# Supplementary material for: Integration of CO2capture, activation, and conversion with a ternary acetylglucosyl 2-methyl-imidazolium modified Pd catalyst
Source: Royal Society of Chemistry journal article supplement (doi:10.1039/d3qo00067b), 2023-01-01
Supplement: d3qo00067b1.pdf [file d3qo00067b1.pdf]

*Electronic Supplementary Information for*

## **Integration of CO<sub>2</sub> Capture, Activation, and Conversion in a Ternary Acetylglucosyl 2-Methyl-imidazolium Modified Pd Catalyst**

Zhong-Gao Zhou,<sup>\*†a</sup> Peng He,<sup>†a</sup> Jing Li,<sup>†a,b</sup> Jia Zhang,<sup>b</sup> Guo-Hai Xu,<sup>a</sup> Shi-Yong Zhang,<sup>a</sup> Xiao-Xiao  
Deng,<sup>b</sup> Zi-Yi Du,<sup>b</sup> Guo-Tian Luo,<sup>a</sup> Hong-Yu Zhen,<sup>c</sup> Yi-Wang Chen<sup>a,b,d</sup> and Chun-Ting He<sup>\*b</sup>

---

<sup>a</sup> *College of Chemistry and Chemical Engineering, Key Laboratory of Jiangxi*

*University for Functional Materials Chemistry, Gannan Normal University, Ganzhou,  
Jiangxi, 341000, R.P. China. Email: [zhgzhou@foxmail.com](mailto:zhgzhou@foxmail.com).*

<sup>b</sup> *Key Lab of Fluorine and Silicon for Energy Materials and Chemistry of Ministry of  
Education/National Engineering Research Center for Carbohydrate Synthesis, College  
of Chemistry and Chemical Engineering, Jiangxi Normal University, Nanchang, Jiangxi,  
330022, R.P. China. Email: [hct@jxnu.edu.cn](mailto:hct@jxnu.edu.cn).*

<sup>c</sup> *College of Chemistry and Chemical Engineering College of Materials Science and  
Engineering, Fujian Key Laboratory of Polymer Materials, Fujian Normal University,  
Fuzhou, Fujian, 350007, R.P. China.*

<sup>d</sup> *Institute of Polymers and Energy Chemistry, Nanchang University, Nanchang,  
Jiangxi, 330031, R.P. China.*

† Z. Zhou, P. He, and J. Li contributed equally to this work.

## Table of Contents

|                                                                                                           |    |
|-----------------------------------------------------------------------------------------------------------|----|
| 1. Experimental Section                                                                                   | 2  |
| 1.1 General                                                                                               | 2  |
| 1.2 Synthesis and Characterization of Imidazolium Salts                                                   | 3  |
| 1.3 Synthesis and Characterization of Propargyl Amines                                                    | 10 |
| 2. Catalytic Section                                                                                      | 13 |
| 2.1 Optimization of the Reaction Conditions                                                               | 13 |
| 2.2 Comparison of Turnover Frequency with Other Reported Catalysts                                        | 15 |
| 2.3 General Procedure for Pd-catalyzed Carboxylative Cyclization of CO <sub>2</sub> with Propargyl Amines | 16 |
| 2.4 NMR Data of 2-oxazolidinones <b>14a-14p</b>                                                           | 18 |
| 2.5 NMR, FT-IR and HR-MS Spectra of Imidazolium Salts                                                     | 21 |
| 2.6 NMR Spectra of Mechanisms                                                                             | 41 |
| 2.7 NMR Spectra of Propargyl Amines and 2-oxazolidinones                                                  | 48 |
| 3. Notes and references                                                                                   | 60 |

## 1. Experimental Section

### 1.1 General

All NMR spectra were tested with Bruker Advance III 400 NMR spectrometer. Chemical shifts were given in ppm. Melting points were determined on X-5 melting point instrument. FT-IR spectra were tested on an Avatar Nicolet FT-IR spectrometer in neat with the smart OMNI-transmission accessories or KBr pellets by standard method, and frequencies were reported as  $\text{cm}^{-1}$ . HPLC/HR-MS (ESI) spectra were acquired using a Waters G2-XS QTOF mass spectrometer, and the samples were dissolved in methanol.

All reagents were supplied commercially from Sinopharm Chemical Reagent Limited Corporation or Shanghai Aladdin Biochemical Technology Co., Ltd., and were used as received unless otherwise noted. Nitrogen gas ( $\text{N}_2$ , 99.999%) and dilute  $\text{CO}_2$  ( $\text{CO}_2/\text{N}_2$ , Vol/Vol = 15:85) were purchased from Ganzhou Shengda Gas Co., Ltd. Flash column chromatography was performed over silica gel (300-400 mesh).

## 1.2 Synthesis and Characterization of Imidazolium Salts

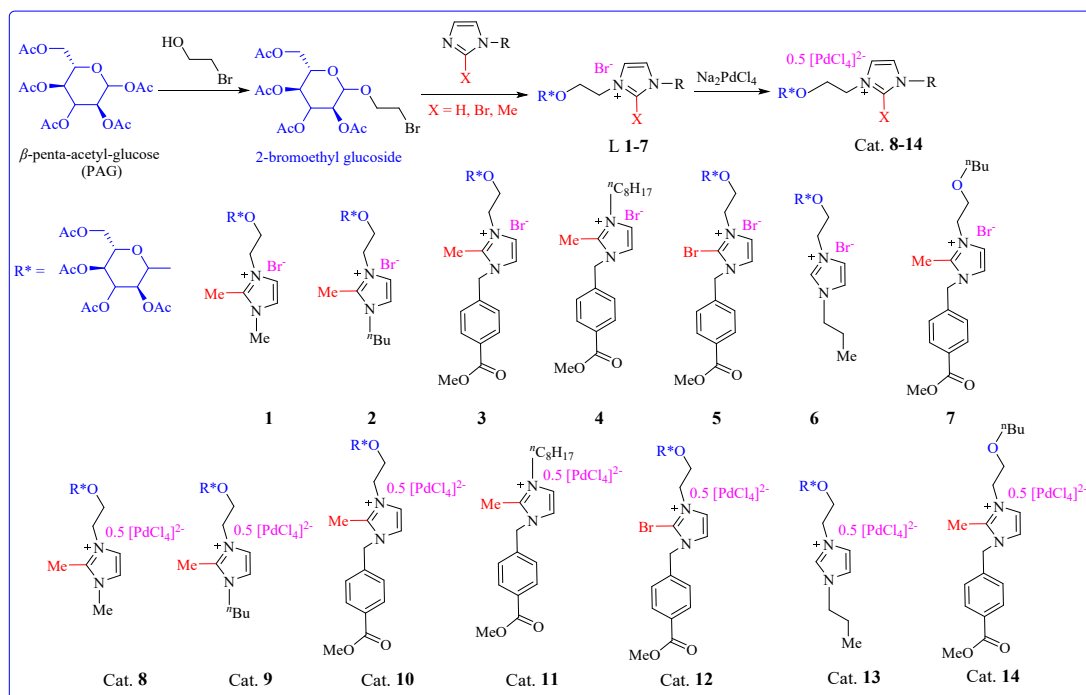

Scheme S1. The synthesis and structures of imidazolium salts **1-14**.

### Synthesis of R-Im-Br **1-7**.

$\beta$ -Penta-acetyl-glucose (PAG, 12.00 g, 30 mmol) and bromoethanol (4.2 g, 34 mmol) were dissolved in DCM (100 mL) and treated with  $\text{BF}_3 \cdot \text{OEt}_2$  (6.6 g, 46 mmol). The reaction was stirred at R.T. for 6 h and washed with a solution of  $\text{NaHCO}_3$  and saturated salt water. The organic layer was dried over  $\text{MgSO}_4$  and then concentrated. The solid was crystallized from ethanol to give colorless crystals 2-bromoethyl glucoside (7.8 g, 56%). The 2-bromoethyl glucoside (1.0 equivalent) and *N*-alkylated imidazole (3.0 equivalent) were dissolved in dry acetonitrile, and the resulting solution was heated at 110 °C for 48 h. After cooling, acetonitrile was removed by rotary evaporation. Purification by column chromatography on silica with dichloromethane/methanol (V:V = 20:1 to 10:1) afforded products R-Im-Br **1-7** (84-96 %) as pale yellow solids.<sup>1</sup>

### Synthesis of Im- $\text{PdCl}_4$ **8-14**.

In a 100 mL round-bottom flask, R-Im-Br **1** (0.17 g, 0.30 mmol) were dissolved in 50.0 mL of dichloromethane, and aqueous solution of potassium tetrachloropalladate (0.1 g·mL<sup>-1</sup>, 7.6 mL) was added in the flask and the mixture was stirred at room temperature overnight. The

solution was washed twice with ultrapure water, then removed by rotary evaporation and dried under vacuum to get the product Im-PdCl<sub>4</sub> **8** (0.17 g, 99%) as a reddish brown solid. R-Im-PdCl<sub>4</sub> **9-14** were prepared in a similar method of that for R-Im-PdCl<sub>4</sub> **8**. The R-Im-PdCl<sub>4</sub> **8-14** absorbs moisture easily and followed the trend of the other palladium salts, being reddish brown.

**1-[2-(2,3,4,6-tetra-O-acetyl-β-D-glucopyranosyloxy)-ethyl]-2,3-dimethyl-imidazolium bromide (1)**

Pale yellow solid, 89%, *M<sub>p</sub>*: 105 – 107 °C. <sup>1</sup>H NMR (400 MHz, CDCl<sub>3</sub>): δ 7.96 (d, *J* = 1.9 Hz, 1H), 7.55 (d, *J* = 1.9 Hz, 1H), 5.13 (dd, *J* = 11.0, 8.0 Hz, 1H), 4.98 (t, *J* = 9.7 Hz, 1H), 4.83 (dd, *J* = 9.5, 8.1 Hz, 1H), 4.68 (dd, *J* = 15.0, 3.0 Hz, 1H), 4.52 (d, *J* = 8.0 Hz, 2H), 4.22 (dd, *J* = 12.4, 4.8 Hz, 2H), 4.14 – 4.00 (m, 2H), 3.91 (s, 3H), 3.72 (ddd, *J* = 10.1, 4.7, 2.0 Hz, 1H), 2.70 (s, 3H), 2.07 (s, 3H), 2.01 – 1.88 (m, 9H); <sup>13</sup>C NMR (101 MHz, CDCl<sub>3</sub>): δ 170.1, 169.3, 168.9, 168.8, 144.5, 122.0, 120.9, 99.5, 77.3, 77.0, 76.7, 71.8, 70.8, 70.4, 67.6, 67.5, 61.0, 53.2, 47.8, 35.3, 20.2, 20.2, 19.9, 19.9, 10.1. FT-IR (KBr): 3417, 2958, 1748, 1632, 1592, 1541, 1429, 1375, 1228, 1039, 909, 697, 601, 431 cm<sup>-1</sup>. LC-HR/MS (ESI-QTOF) *m/z*: [M-Br]<sup>+</sup> calcd for C<sub>21</sub>H<sub>31</sub>N<sub>2</sub>O<sub>10</sub>, 471.1973; found, 471.1980.

**1-[2-(2,3,4,6-tetra-O-acetyl-β-D-glucopyranosyloxy)-ethyl]-2-methyl-3-butyl-imidazolium bromide (2)**

Pale yellow solid, 91%, *M<sub>p</sub>*: 123 – 128 °C. <sup>1</sup>H NMR (400 MHz, CDCl<sub>3</sub>): δ 7.96 (d, *J* = 2.1 Hz, 1H), 7.43 (d, *J* = 2.1 Hz, 1H), 5.09 (t, *J* = 9.5 Hz, 1H), 4.92 (t, *J* = 9.7 Hz, 1H), 4.78 (dd, *J* = 9.7, 8.0 Hz, 1H), 4.66 (ddd, *J* = 14.6, 5.3, 2.9 Hz, 1H), 4.55 (dd, *J* = 7.8, 3.1 Hz, 1H), 4.51 (d, *J* = 8.0 Hz, 1H), 4.19 (ddd, *J* = 12.3, 7.0, 4.1 Hz, 2H), 4.14 – 4.04 (m, 3H), 4.01 (dd, *J* = 12.4, 2.2 Hz, 1H), 3.70 (ddd, *J* = 10.1, 4.9, 2.2 Hz, 1H), 2.67 (s, 3H), 2.02 (s, 3H), 1.94 (s, 3H), 1.89 (d, *J* = 6.6 Hz, 6H), 1.76 (dt, *J* = 20.9, 7.5 Hz, 2H), 1.43 – 1.27 (m, 2H), 0.91 (t, *J* = 7.4 Hz, 3H); <sup>13</sup>C NMR (101 MHz, CDCl<sub>3</sub>): δ 170.5, 169.8, 169.5, 169.4, 144.3, 122.6, 121.8, 100.2, 77.3, 77.0, 76.7, 72.5, 71.8, 71.0, 68.1, 67.7, 61.6, 53.4, 49.4, 49.3, 31.4, 20.9, 20.5, 20.5, 19.7, 13.5, 11.5. FT-IR (KBr): 3408, 2961, 2937, 2876, 1749, 1634, 1586, 1533, 1431, 1376, 1231, 1167, 1040, 909, 752, 675, 600, 557, 490 cm<sup>-1</sup>. LC-HR/MS (ESI-QTOF) *m/z*: [M-Br]<sup>+</sup> calcd for C<sub>24</sub>H<sub>37</sub>N<sub>2</sub>O<sub>10</sub>, 513.2443; found, 513.2446.

**1-[2-(2,3,4,6-tetra-O-acetyl- $\beta$ -D-glucopyranosyloxy)-ethyl]-2-methyl-3-[4-(methoxycarbonyl)phenyl]-imidazolium bromide (3)**

Pale yellow solid, 86%,  $M_p$ : 100 – 102 °C.  $^1\text{H}$  NMR (400 MHz,  $\text{CDCl}_3$ ):  $\delta$  7.87 (d,  $J$  = 8.3 Hz, 2H), 7.78 (d,  $J$  = 1.8 Hz, 1H), 7.62 (d,  $J$  = 1.8 Hz, 1H), 7.29 (d,  $J$  = 8.3 Hz, 2H), 5.53 (dd,  $J$  = 43.3, 15.7 Hz, 2H), 5.02 (t,  $J$  = 9.5 Hz, 1H), 4.83 (t,  $J$  = 9.7 Hz, 1H), 4.66 (dd,  $J$  = 9.6, 8.1 Hz, 1H), 4.47 (d,  $J$  = 8.0 Hz, 1H), 4.08 (dt,  $J$  = 12.4, 6.2 Hz, 2H), 3.98 – 3.89 (m, 2H), 3.75 (s, 3H), 3.64 (ddd,  $J$  = 10.1, 4.5, 2.2 Hz, 1H), 2.57 (s, 3H), 1.90 (s, 3H), 1.90 (s, 3H), 1.85 (s, 3H), 1.83 (s, 3H), 1.77 (s, 3H);  $^{13}\text{C}$  NMR (101 MHz,  $\text{CDCl}_3$ ):  $\delta$  170.0, 169.3, 168.91, 168.9, 165.6, 144.6, 137.5, 130.0, 129.8, 127.5, 121.7, 121.4, 99.5, 77.3, 77.0, 76.7, 71.8, 71.1, 70.4, 67.6, 67.3, 61.1, 51.7, 51.1, 48.1, 20.2, 20.2, 19.9, 19.9, 10.5. FT-IR (KBr): 3416, 2957, 2929, 2858, 1753, 1723, 1615, 1584, 1531, 1434, 1374, 1283, 1226, 1111, 1039, 963, 909, 746, 672, 600, 539  $\text{cm}^{-1}$ . LC–HR/MS (ESI-QTOF)  $m/z$ :  $[\text{M-Br}]^+$  calcd for  $\text{C}_{29}\text{H}_{37}\text{N}_2\text{O}_{12}$ , 605.2346; found, 605.2349.

**1-(*n*-octyl)-2-methyl-3-[4-(methoxycarbonyl)phenyl]-imidazolium bromide (4)**

Pale yellow solid, 84%,  $M_p$ : 86 – 88 °C.  $^1\text{H}$  NMR (400 MHz,  $\text{CDCl}_3$ ):  $\delta$  8.01 (d,  $J$  = 2.0 Hz, 1H), 7.97 (d,  $J$  = 8.3 Hz, 2H), 7.74 (d,  $J$  = 2.0 Hz, 1H), 7.52 (d,  $J$  = 8.3 Hz, 2H), 5.86 (s, 2H), 4.28 (t,  $J$  = 7.4 Hz, 2H), 3.89 (s, 3H), 2.80 (s, 3H), 1.86 – 1.76 (m, 2H), 1.32 – 1.20 (m, 10H), 0.85 (t,  $J$  = 6.9 Hz, 3H);  $^{13}\text{C}$  NMR (101 MHz,  $\text{CDCl}_3$ ):  $\delta$  165.4, 142.9, 137.7, 129.5, 129.4, 127.3, 121.7, 120.9, 77.3, 77.00, 76.7, 53.0, 51.4, 50.8, 48.8, 48.1, 30.7, 28.9, 28.1, 28.1, 25.4, 21.6, 13.1, 10.4. FT-IR (KBr): 3425, 3089, 3039, 2929, 2857, 1724, 1613, 1579, 1525, 1436, 1380, 1279, 1186, 1109, 1020, 964, 739, 540  $\text{cm}^{-1}$ . LC–HR/MS (ESI-QTOF)  $m/z$ :  $[\text{M-Br}]^+$  calcd for  $\text{C}_{21}\text{H}_{31}\text{N}_2\text{O}_2$ , 343.2380; found, 343.2383.

**1-[2-(2,3,4,6-tetra-O-acetyl- $\beta$ -D-glucopyranosyloxy)-ethyl]-2-bromo-3-[4-(methoxycarbonyl)phenyl]-imidazolium bromide (5)**

Pale yellow solid, 96%,  $M_p$ : 112 – 116 °C.  $^1\text{H}$  NMR (400 MHz,  $\text{CDCl}_3$ ):  $\delta$  7.97 (d,  $J$  = 1.7 Hz, 1H), 7.90 (d,  $J$  = 1.8 Hz, 1H), 7.83 (d,  $J$  = 8.2 Hz, 2H), 7.37 (d,  $J$  = 8.2 Hz, 2H), 5.51 (q,  $J$  = 15.1 Hz, 2H), 5.00 (t,  $J$  = 9.5 Hz, 1H), 4.81 (t,  $J$  = 9.7 Hz, 1H), 4.72 – 4.64 (m, 1H), 4.52 (d,  $J$  = 8.0 Hz, 1H), 4.44 (s, 2H), 4.13 – 3.99 (m, 2H), 3.94 (d,  $J$  = 11.8 Hz, 2H), 3.71 (s, 3H), 3.68 – 3.63 (m, 1H), 1.88 (s, 3H), 1.84 – 1.73 (m, 9H);  $^{13}\text{C}$  NMR (101 MHz,  $\text{CDCl}_3$ ):  $\delta$  170.2, 169.5, 169.0, 169.0, 165.7, 136.7, 130.5, 130.0, 129.9, 128.3, 124.8, 123.9, 122.9, 99.6, 77.3,

77.0, 76.7, 72.0, 71.3, 70.5, 67.7, 66.2, 61.2, 53.0, 51.9, 50.3, 49.5, 20.4, 20.4, 20.1, 20.1. FT-IR (KBr): 3421, 2955, 1752, 1616, 1571, 1514, 1436, 1374, 1286, 1277, 1111, 1039, 908, 741, 675, 601, 538  $\text{cm}^{-1}$ . LC-HR/MS (ESI-QTOF)  $m/z$ :  $[\text{M-Br}]^+$  calcd for  $\text{C}_{28}\text{H}_{34}\text{BrN}_2\text{O}_{12}$ , 669.1295; found, 669.1297.

**1-[2-(2,3,4,6-tetra-O-acetyl- $\beta$ -D-glucopyranosyloxy)-ethyl]-3-propyl-imidazolium bromide (6)**

Pale yellow solid, 88%,  $M_p$ : 86 – 88 °C.  $^1\text{H}$  NMR (400 MHz,  $\text{CDCl}_3$ ):  $\delta$  9.34 (s, 1H), 7.36 (d,  $J = 13.4$  Hz, 2H), 4.85 (t,  $J = 9.5$  Hz, 1H), 4.67 (t,  $J = 9.7$  Hz, 1H), 4.60 – 4.52 (m, 1H), 4.43 (d,  $J = 8.0$  Hz, 1H), 4.39 – 4.28 (m, 2H), 3.97 (t,  $J = 7.2$  Hz, 2H), 3.90 (dd,  $J = 12.1, 4.4$  Hz, 2H), 3.85 – 3.72 (m, 2H), 3.60 – 3.53 (m, 1H), 1.73 (s, 3H), 1.68 (s, 3H), 1.67 – 1.61 (m, 8H), 0.64 (t,  $J = 7.4$  Hz, 3H);  $^{13}\text{C}$  NMR (101 MHz,  $\text{CDCl}_3$ ):  $\delta$  169.8, 169.0, 168.8, 168.6, 135.7, 122.6, 121.2, 99.4, 77.3, 77.0, 76.7, 71.5, 70.9, 70.3, 67.3, 66.9, 60.9, 50.6, 48.9, 22.7, 20.0, 20.0, 19.7, 19.7, 9.9. FT-IR (KBr): 3420, 2968, 2887, 1750, 1632, 1565, 1435, 1375, 1229, 1169, 1040, 909, 600, 540  $\text{cm}^{-1}$ . LC-HR/MS (ESI-QTOF)  $m/z$ :  $[\text{M-Br}]^+$  calcd for  $\text{C}_{22}\text{H}_{33}\text{N}_2\text{O}_{10}$ , 485.2130; found, 485.2137.

**3-(2-butoxyethyl)-1-(4-(methoxycarbonyl)benzyl)-2-methyl-1H-imidazol-3-ium bromide (7)**

Pale yellow solid, 89%.  $^1\text{H}$  NMR (400 MHz,  $\text{CDCl}_3$ ):  $\delta$  8.02 (d,  $J = 8.3$  Hz, 2H), 7.85 (d,  $J = 2.0$  Hz, 1H), 7.81 (d,  $J = 2.0$  Hz, 1H), 7.36 (d,  $J = 8.3$  Hz, 2H), 4.52 – 4.47 (m, 2H), 3.91 (s, 3H), 3.78 – 3.73 (m, 2H), 3.36 (t,  $J = 6.5$  Hz, 2H), 2.71 (s, 3H), 1.44 – 1.36 (m, 3H), 1.33 – 1.26 (m, 1H), 1.19 (dt,  $J = 22.1, 7.4$  Hz, 3H), 0.82 (t,  $J = 7.4$  Hz, 3H);  $^{13}\text{C}$  NMR (101 MHz,  $\text{CDCl}_3$ ):  $\delta$  166.1, 144.7, 138.4, 130.3, 130.2, 127.6, 122.3, 122.0, 119.7, 77.3, 77.0, 76.7, 52.1, 51.5, 48.9, 31.3, 19.0, 13.6, 10.8. FT-IR (KBr): 3487, 3415, 3130, 3070, 2955, 2870, 1735, 1631, 1586, 1424, 1292, 1191, 1111, 1020, 834, 776, 745, 687, 557, 420  $\text{cm}^{-1}$ .

**1-[2-(2,3,4,6-tetra-O-acetyl- $\beta$ -D-glucopyranosyloxy)-ethyl]-2,3-dimethyl-imidazolium tetratetrachloropalladate (8)**

Reddish brown solid, 99%,  $M_p$ : 96 – 98 °C.  $^1\text{H}$  NMR (400 MHz,  $\text{CDCl}_3$ ):  $\delta$  7.76 (d,  $J = 2.1$  Hz, 1H), 7.57 (d,  $J = 2.0$  Hz, 1H), 5.19 (t,  $J = 9.5$  Hz, 1H), 5.03 (t,  $J = 9.7$  Hz, 1H), 4.92 (dd,  $J = 9.6, 8.0$  Hz, 1H), 4.81 – 4.64 (m, 3H), 4.37 (dt,  $J = 8.7, 4.2$  Hz, 1H), 4.27 (dd,  $J = 12.5, 4.6$  Hz, 1H), 4.22 – 4.10 (m, 2H), 4.06 (s, 3H), 3.80 (ddd,  $J = 10.0, 4.5, 2.2$  Hz, 1H), 2.93 (s,

3H), 2.10 (s, 3H), 2.02 – 1.96 (m, 9H) ppm;  $^{13}\text{C}$  NMR (101 MHz,  $\text{CDCl}_3$ ):  $\delta$  170.6, 169.9, 169.5, 145.1, 128.5, 123.0, 122.2, 121.1, 100.3, 77.3, 77.0, 76.7, 72.5, 71.8, 71.1, 68.1, 67.8, 61.6, 49.3, 36.4, 20.9, 20.5, 20.5, 11.6. FT-IR (KBr): 3436, 3139, 2961, 2360, 1747, 1589, 1537, 1513, 1429, 1369, 1223, 1169, 1120, 1037, 957, 800, 748, 697  $\text{cm}^{-1}$ . LC-HR/MS (ESI-QTOF)  $m/z$ :  $[\text{M-PdCl}_4]^+$  calcd for  $\text{C}_{21}\text{H}_{31}\text{N}_2\text{O}_{10}$ , 471.1973; found, 471.1980.

**1-[2-(2,3,4,6-tetra-O-acetyl- $\beta$ -D-glucopyranosyloxy)-ethyl]-2-methyl-3-butyl-imidazolium tetratetrachloropalladate (9)**

Reddish brown solid, 98%,  $M_p$ : 120 – 122  $^\circ\text{C}$ .  $^1\text{H}$  NMR (400 MHz,  $\text{CDCl}_3$ ):  $\delta$  7.78 (d,  $J = 2.0$  Hz, 1H), 7.52 (d,  $J = 2.0$  Hz, 1H), 5.16 (d,  $J = 9.5$  Hz, 1H), 5.00 (t,  $J = 9.7$  Hz, 1H), 4.89 (dd,  $J = 9.5, 8.1$  Hz, 1H), 4.73 (dd,  $J = 18.8, 5.8$  Hz, 3H), 4.39 (s, 1H), 4.34 – 4.28 (m, 2H), 4.28 – 4.22 (m, 2H), 4.12 (dd,  $J = 12.4, 1.9$  Hz, 1H), 3.81 (dd,  $J = 10.1, 2.3$  Hz, 1H), 2.91 (s, 3H), 2.07 (s, 3H), 2.00 – 1.94 (m, 9H), 1.93 – 1.87 (m, 2H), 1.45 (dq,  $J = 14.7, 7.3$  Hz, 2H), 1.45 (dq,  $J = 14.7, 7.3$  Hz, 2H), 0.99 (t,  $J = 7.3$  Hz, 3H), 0.99 (t,  $J = 7.3$  Hz, 3H) ppm;  $^{13}\text{C}$  NMR (101 MHz,  $\text{CDCl}_3$ ):  $\delta$  170.6, 169.9, 169.5, 144.4, 122.7, 121.9, 100.3, 77.3, 77.0, 76.7, 72.5, 71.9, 71.1, 68.1, 67.6, 61.7, 49.6, 49.4, 31.5, 20.9, 20.5, 20.5, 19.8, 13.6, 11.5. FT-IR (KBr): 3597, 3513, 3177, 3134, 2960, 2936, 2874, 1753, 1626, 1585, 1530, 1433, 1375, 1227, 1169, 1126, 1037, 908, 749, 698  $\text{cm}^{-1}$ . LC-HR/MS (ESI-QTOF)  $m/z$ :  $[\text{M-PdCl}_4]^+$  calcd for  $\text{C}_{24}\text{H}_{37}\text{N}_2\text{O}_{10}$ , 513.2443; found, 513.2446.

**1-[2-(2,3,4,6-tetra-O-acetyl- $\beta$ -D-glucopyranosyloxy)-ethyl]-2-methyl-3-[4-(methoxycarbonyl)phenyl]-imidazolium tetratetrachloropalladate (10)**

Reddish brown solid, 98%,  $M_p$ : 93 – 95  $^\circ\text{C}$ .  $^1\text{H}$  NMR (400 MHz,  $\text{CDCl}_3$ ):  $\delta$  8.13 (d,  $J = 8.4$  Hz, 2H), 7.82 (d,  $J = 2.2$  Hz, 1H), 7.49 (d,  $J = 2.2$  Hz, 1H), 7.47 (d,  $J = 8.4$  Hz, 2H), 5.74 (d,  $J = 2.7$  Hz, 2H), 5.22 (t,  $J = 9.5$  Hz, 1H), 5.08 – 5.00 (m, 1H), 4.93 (dd,  $J = 9.7, 8.0$  Hz, 1H), 4.83 (t,  $J = 4.9$  Hz, 2H), 4.70 (d,  $J = 8.0$  Hz, 1H), 4.42 (dt,  $J = 10.6, 4.4$  Hz, 1H), 4.30 – 4.22 (m, 2H), 4.16 (dd,  $J = 12.5, 2.2$  Hz, 1H), 3.94 (s, 3H), 3.79 (ddd,  $J = 10.1, 4.6, 2.2$  Hz, 1H), 3.00 (s, 3H), 2.08 (s, 3H), 2.02 (s, 3H), 2.01 (s, 3H), 2.00 (s, 3H);  $^{13}\text{C}$  NMR (101 MHz,  $\text{CDCl}_3$ ):  $\delta$  170.5, 169.9, 169.5, 169.4, 166.2, 145.2, 137.3, 131.0, 130.6, 128.4, 122.8, 122.3, 100.2, 77.3, 77.0, 76.7, 72.4, 71.9, 71.0, 68.1, 67.3, 61.6, 52.7, 52.3, 49.5, 20.9, 20.8, 20.5, 20.5, 11.8. FT-IR (KBr): 3452, 3141, 2954, 1752, 1615, 1585, 1529, 1434, 1376, 1285, 1227, 1111, 1038, 908, 744, 699  $\text{cm}^{-1}$ . LC-HR/MS (ESI-QTOF)  $m/z$ :  $[\text{M-PdCl}_4]^+$  calcd for



C<sub>29</sub>H<sub>37</sub>N<sub>2</sub>O<sub>12</sub>, 605.2346; found, 605.2349.

**1-(*n*-octyl)-2-methyl-3-[4-(methoxycarbonyl)phenyl]-imidazolium**

**tetratetrachloropalladate (11)**

Reddish brown solid, 99%, *M<sub>p</sub>*: 104 – 106 °C. <sup>1</sup>H NMR (400 MHz, CDCl<sub>3</sub>): δ 8.03 (d, *J* = 8.2 Hz, 2H), 7.46 (d, *J* = 1.6 Hz, 1H), 7.41 (d, *J* = 8.3 Hz, 3H), 5.78 (s, 2H), 4.32 (t, *J* = 7.5 Hz, 2H), 3.90 (s, 3H), 2.95 (s, 3H), 1.91 – 1.78 (m, 2H), 1.39 – 1.15 (m, 11H), 0.86 (t, *J* = 6.8 Hz, 3H); <sup>13</sup>C NMR (101 MHz, CDCl<sub>3</sub>): δ 166.2, 144.0, 138.3, 130.5, 130.4, 128.1, 122.5, 121.7, 77.3, 77.0, 76.7, 52.7, 52.2, 49.5, 31.5, 29.4, 28.9, 28.9, 26.4, 22.5, 13.9, 11.9. FT-IR (KBr): 3440, 3158, 3115, 3093, 2953, 2934, 2853, 2382, 1953, 1728, 1656, 1613, 1580, 1530, 1465, 1439, 1379, 1358, 1352, 1278, 1186, 1165, 1109, 1020, 965, 871, 838, 805, 782, 751, 733, 703 cm<sup>-1</sup>. LC-HR/MS (ESI-QTOF) *m/z*: [M-PdCl<sub>4</sub>]<sup>+</sup> calcd for C<sub>21</sub>H<sub>31</sub>N<sub>2</sub>O<sub>2</sub>, 343.2380; found, 343.2383.

**1-[2-(2,3,4,6-tetra-O-acetyl-β-D-glucopyranosyloxy)-ethyl]-2-bromo-3-[4-**

**(methoxycarbonyl)phenyl]-imidazolium tetratetrachloropalladate (12)**

Reddish brown solid, 99%, *M<sub>p</sub>*: 94 – 97 °C. <sup>1</sup>H NMR (400 MHz, CDCl<sub>3</sub>): δ 8.13 – 8.09 (m, 3H), 7.75 (d, *J* = 2.2 Hz, 1H), 7.55 (d, *J* = 8.2 Hz, 2H), 5.81 (s, 2H), 5.20 (t, *J* = 9.5 Hz, 1H), 5.03 (t, *J* = 9.8 Hz, 1H), 4.94 (dd, *J* = 9.5, 8.1 Hz, 1H), 4.86 (t, *J* = 4.8 Hz, 2H), 4.76 (d, *J* = 8.0 Hz, 1H), 4.49 (dd, *J* = 10.6, 5.6 Hz, 1H), 4.38 – 4.30 (m, 1H), 4.25 (dd, *J* = 12.5, 4.4 Hz, 1H), 4.18 (dd, *J* = 12.4, 2.0 Hz, 1H), 3.92 (s, 3H), 3.85 – 3.79 (m, 1H), 2.07 (s, 3H), 2.00 (s, 3H), 1.98 (s, 6H); <sup>13</sup>C NMR (101 MHz, CDCl<sub>3</sub>): δ 170.6, 170.0, 169.6, 169.5, 166.2, 136.4, 131.4, 130.7, 129.0, 126.2, 124.9, 121.8, 100.3, 77.3, 77.0, 76.7, 72.5, 72.0, 71.0, 68.1, 66.4, 61.6, 54.9, 52.4, 51.8, 20.9, 20.5. FT-IR (KBr): 3449, 3104, 2958, 2851, 1752, 1720, 1642, 1614, 1570, 1507, 1434, 1371, 1285, 1258, 1225, 1185, 1038, 964, 911, 873, 841, 801, 735, 697 cm<sup>-1</sup>. LC-HR/MS (ESI-QTOF) *m/z*: [M-PdCl<sub>4</sub>]<sup>+</sup> calcd for C<sub>28</sub>H<sub>34</sub>BrN<sub>2</sub>O<sub>12</sub>, 669.1295; found, 669.1297.

**1-[2-(2,3,4,6-tetra-O-acetyl-β-D-glucopyranosyloxy)-ethyl]-3-propyl-imidazolium**

**tetratetrachloropalladate (13)**

Reddish brown solid, 99%, *M<sub>p</sub>*: 94 – 97 °C. <sup>1</sup>H NMR (400 MHz, CDCl<sub>3</sub>): δ 10.20 (s, 1H), 7.54 (s, 1H), 7.32 (s, 1H), 5.21 (t, *J* = 9.5 Hz, 1H), 5.05 (t, *J* = 9.7 Hz, 2H), 4.97 (dd, *J* = 9.5, 8.1 Hz, 1H), 4.85 (dd, *J* = 13.1, 6.4 Hz, 1H), 4.70 (d, *J* = 8.0 Hz, 1H), 4.40 (ddd, *J* = 17.7,

12.0, 5.3 Hz, 4H), 4.33 – 4.26 (m, 1H), 4.16 (dd,  $J = 12.3, 1.6$  Hz, 1H), 3.87 – 3.78 (m, 1H), 2.10 (s, 3H), 2.04 (s, 3H), 2.02 (t,  $J = 6.6$  Hz, 8H), 1.02 (t,  $J = 7.4$  Hz, 3H).  $^{13}\text{C}$  NMR (101 MHz,  $\text{CDCl}_3$ ):  $\delta$  170.5, 169.9, 169.7, 169.4, 137.1, 123.6, 121.0, 100.4, 77.3, 77.0, 76.7, 72.4, 71.7, 71.1, 68.6, 68.1, 61.6, 51.7, 50.2, 23.5, 20.8, 20.8, 20.5, 10.8. FT-IR (KBr): 3484, 3136, 3098, 3055, 2967, 2881, 1752, 1628, 1564, 1523, 1440, 1375, 1227, 1167, 1062, 1039, 957, 909, 842, 799, 755, 697  $\text{cm}^{-1}$ . LC-HR/MS (ESI-QTOF)  $m/z$ :  $[\text{M-PdCl}_4]^+$  calcd for  $\text{C}_{22}\text{H}_{33}\text{N}_2\text{O}_{10}$ , 485.2130; found, 485.2137.

**3-(2-butoxyethyl)-1-(4-(methoxycarbonyl)benzyl)-2-methyl-1H-imidazol-3-ium  
tetratetrachloropalladate (14)**

Reddish brown solid, 99%.  $^1\text{H}$  NMR (400 MHz,  $\text{CDCl}_3$ ):  $\delta$  8.02 (d,  $J = 8.0$  Hz, 2H), 7.50 (s, 1H), 7.33 (d,  $J = 7.9$  Hz, 3H), 4.56 (s, 2H), 3.90 (s, 3H), 3.79 (s, 2H), 3.40 (t,  $J = 6.4$  Hz, 2H), 2.91 (s, 3H), 1.48 – 1.35 (m, 3H), 1.27 – 1.22 (m, 4H), 0.83 (t,  $J = 7.3$  Hz, 3H);  $^{13}\text{C}$  NMR (101 MHz,  $\text{CDCl}_3$ ):  $\delta$  166.3, 145.4, 138.6, 130.5, 130.4, 127.8, 122.1, 122.1, 77.3, 77.0, 76.7, 71.1, 68.4, 52.5, 52.2, 49.5, 31.6, 31.5, 29.6, 19.2, 13.8, 11.9. FT-IR (KBr): 3439, 3114, 3089, 2959, 2932, 2872, 1723, 1615, 1583, 1521, 1454, 1420, 1283, 1185, 1121, 1106, 1018, 833, 796, 750, 543, 417.

### 1.3 Synthesis and Characterization of Propargyl Amines

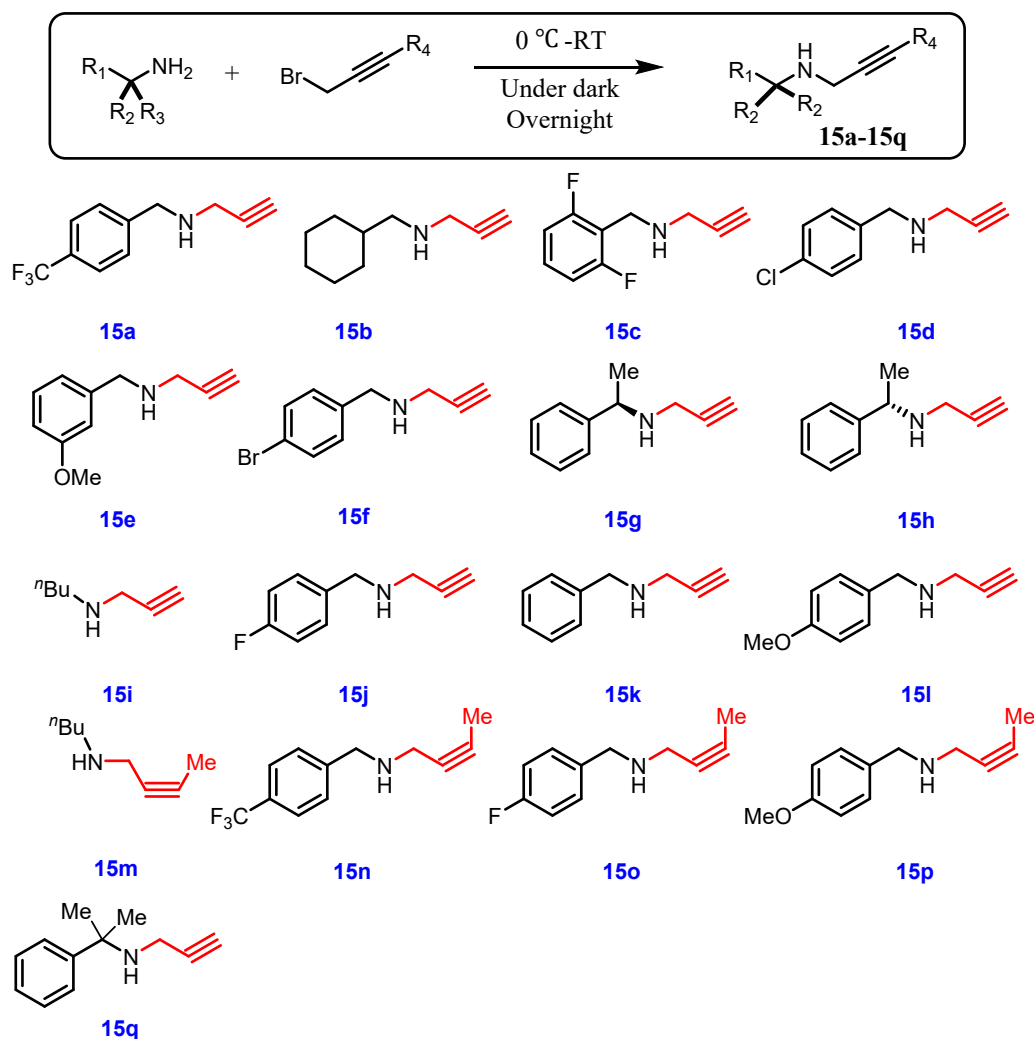

Scheme S2. The synthesis and structures of propargyl amines **15a-15q**.

Synthesis of propargyl amines **15a-15q**.<sup>2</sup> For the preparation of propargyl amines, propargyl halide (1.0 mmol) was added dropwise to the corresponding amine (3.0 mmol) at 0 °C in dark and warm up to room temperature slowly, the reaction was stirred for 12-24 h. Then, NaOH and dichloromethane were added. After extraction of the aqueous layer with dichloromethane, washed with saturate brine, dried with MgSO<sub>4</sub> and the solvent was removed. The crude was purified by flash column chromatography (silica gel, V<sub>PE</sub>/V<sub>EA</sub> = 20:1).

*N*-(4-(trifluoromethyl)benzyl)prop-2-yn-1-amine (**15a**), <sup>1</sup>H NMR (400 MHz, CDCl<sub>3</sub>) δ: 7.58 (d, *J* = 8.1 Hz, 2H), 7.47 (d, *J* = 8.0 Hz, 2H), 3.95 (s, 2H), 3.42 (d, *J* = 2.4 Hz, 2H), 2.27 (t, *J* = 2.4 Hz, 1H). <sup>13</sup>C NMR (101 MHz, CDCl<sub>3</sub>) δ: 143.52, 128.57, 125.58, 125.34, 122.88, 81.69, 71.84, 51.60, 37.32.<sup>3</sup>

*N*-(cyclohexylmethyl)prop-2-yn-1-amine (**15b**). <sup>1</sup>H NMR (400 MHz, CDCl<sub>3</sub>) δ: 3.40 – 3.34 (m, 2H), 2.49 (d, *J* = 6.7 Hz, 2H), 2.18 (t, *J* = 2.1 Hz, 1H), 1.76 – 1.61 (m, 5H), 1.41 (dtd, *J* = 14.0, 7.0, 3.5 Hz, 1H), 1.30 – 1.09 (m, 4H), 0.97 – 0.85 (m, 2H). <sup>13</sup>C NMR (101 MHz, CDCl<sub>3</sub>) δ: 82.45, 71.01, 55.51, 38.41, 37.89, 31.37, 26.61, 26.00.<sup>4</sup>

*N*-(2,6-difluorobenzyl)prop-2-yn-1-amine (**15c**). <sup>1</sup>H NMR (400 MHz, CDCl<sub>3</sub>) δ: 7.22 (ddd, *J* = 13.1, 7.5, 4.2 Hz, 1H), 6.92 – 6.84 (m, 2H), 3.96 (s, 2H), 3.44 (d, *J* = 2.4 Hz, 2H), 2.23 (t, *J* = 2.4 Hz, 1H). <sup>13</sup>C NMR (101 MHz, CDCl<sub>3</sub>) δ: 163.04, 160.58, 129.07, 115.29, 111.45 – 110.99, 81.66, 71.50, 39.65, 37.65.<sup>2</sup>

*N*-(4-chlorobenzyl)prop-2-yn-1-amine (**15d**). <sup>1</sup>H NMR (400 MHz, CDCl<sub>3</sub>) δ: 7.28 (s, 4H), 3.84 (s, 2H), 3.40 (d, *J* = 2.4 Hz, 2H), 2.26 (t, *J* = 2.4 Hz, 1H). <sup>13</sup>C NMR (101 MHz, CDCl<sub>3</sub>) δ: 137.79, 132.80, 129.68, 128.48, 81.78, 71.69, 51.37, 37.17.<sup>5</sup>

*N*-(3-methoxybenzyl)prop-2-yn-1-amine (**15e**). <sup>1</sup>H NMR (400 MHz, CDCl<sub>3</sub>) δ: 7.26 (t, *J* = 8.0 Hz, 1H), 6.95 (d, *J* = 7.1 Hz, 2H), 6.86 – 6.80 (m, 1H), 3.88 (s, 2H), 3.83 (s, 3H), 3.45 (d, *J* = 2.4 Hz, 2H). <sup>13</sup>C NMR (101 MHz, CDCl<sub>3</sub>) δ: 159.80, 141.05, 129.42, 120.69, 81.97, 71.70, 55.19, 52.24, 37.29.<sup>2</sup>

*N*-(4-bromobenzyl)prop-2-yn-1-amine (**15f**). <sup>1</sup>H NMR (400 MHz, CDCl<sub>3</sub>) δ: 7.49 – 7.44 (m, 2H), 7.25 (d, *J* = 8.3 Hz, 2H), 3.86 (s, 2H), 3.43 (d, *J* = 2.4 Hz, 2H). <sup>13</sup>C NMR (101 MHz, CDCl<sub>3</sub>) δ: 138.39, 131.52, 130.12, 120.98, 81.82, 71.76, 51.49, 37.25.<sup>6</sup>

(*R*)-*N*-(1-phenylethyl)prop-2-yn-1-amine (**15g**). <sup>1</sup>H NMR (400 MHz, CDCl<sub>3</sub>) δ: 7.46 – 7.16 (m, 5H), 4.05 (q, *J* = 6.6 Hz, 1H), 3.39 (dd, *J* = 17.1, 2.4 Hz, 1H), 3.19 (dd, *J* = 17.1, 2.4 Hz, 1H), 2.30 – 2.09 (m, 1H), 1.40 (t, *J* = 5.3 Hz, 3H). <sup>13</sup>C NMR (101 MHz, CDCl<sub>3</sub>) δ: 144.47, 128.52, 127.22, 126.90, 82.31, 71.30, 56.36, 35.91, 23.93.<sup>7</sup>

(*S*)-*N*-(1-phenylethyl)prop-2-yn-1-amine (**15h**). <sup>1</sup>H NMR (400 MHz, CDCl<sub>3</sub>) δ: 7.44 – 7.20 (m, 5H), 4.05 (q, *J* = 6.6 Hz, 1H), 3.39 (dd, *J* = 17.1, 2.5 Hz, 1H), 3.19 (dd, *J* = 17.1, 2.4 Hz, 1H), 2.20 (dd, *J* = 37.3, 34.9 Hz, 1H), 1.40 (d, *J* = 6.6 Hz, 3H). <sup>13</sup>C NMR (101 MHz, CDCl<sub>3</sub>) δ: 144.51, 128.54, 127.23, 126.92, 82.35, 71.36, 56.36, 35.91, 23.96.<sup>8</sup>

*N*-(prop-2-yn-1-yl)butan-1-amine (**15i**). <sup>1</sup>H NMR (400 MHz, CDCl<sub>3</sub>) δ: 3.38 (d, *J* = 2.4 Hz, 2H), 2.72 – 2.58 (m, 2H), 2.16 (t, *J* = 2.4 Hz, 1H), 1.44 (qd, *J* = 6.9, 2.7 Hz, 2H), 1.32 (dq, *J* = 14.1, 7.0 Hz, 2H), 0.88 (t, *J* = 7.3 Hz, 3H). <sup>13</sup>C NMR (101 MHz, CDCl<sub>3</sub>) δ: 82.30, 71.11, 48.35, 38.13, 31.90, 20.38, 13.91.<sup>6</sup>

*N*-(4-fluorobenzyl)prop-2-yn-1-amine (**15j**). <sup>1</sup>H NMR (400 MHz, CDCl<sub>3</sub>) δ: 7.34 – 7.27 (m, 2H), 7.04 – 6.96 (m, 2H), 3.84 (s, 2H), 3.40 (d, *J* = 2.4 Hz, 2H), 2.25 (t, *J* = 2.4 Hz, 1H). <sup>13</sup>C NMR (101 MHz, CDCl<sub>3</sub>) δ: 163.28, 160.84, 135.13, 135.10, 130.01, 129.93, 115.31, 115.10, 81.93, 71.65, 51.42, 37.19.<sup>3</sup>

*N*-benzylprop-2-yn-1-amine (**15k**). <sup>1</sup>H NMR (400 MHz, CDCl<sub>3</sub>) δ: 7.36 – 7.29 (m, 4H), 7.28 – 7.22 (m, 1H), 3.87 (s, 2H), 3.42 (d, *J* = 2.4 Hz, 2H), 2.26 (t, *J* = 2.4 Hz, 1H). <sup>13</sup>C NMR (101 MHz, CDCl<sub>3</sub>) δ: 139.43, 128.45, 127.19, 82.11, 71.62, 52.29, 37.35.<sup>2</sup>

*N*-(4-methoxybenzyl)prop-2-yn-1-amine (**15l**). <sup>1</sup>H NMR (400 MHz, CDCl<sub>3</sub>) δ: 7.31 – 7.26 (m, 2H), 6.91 – 6.86 (m, 2H), 3.83 (s, 2H), 3.81 (s, 3H), 3.42 (d, *J* = 2.4 Hz, 2H), 2.28 (t, *J* = 2.4 Hz, 1H). <sup>13</sup>C NMR (101 MHz, CDCl<sub>3</sub>) δ: 158.82, 131.45, 129.64, 113.85, 82.11, 71.56, 55.26, 51.62, 37.14.<sup>6</sup>

*N*-butylbut-2-yn-1-amine (**15m**). <sup>1</sup>H NMR (400 MHz, CDCl<sub>3</sub>) δ: 2.96 (dd, *J* = 4.6, 2.2 Hz, 2H), 2.27 (t, *J* = 7.1 Hz, 2H), 1.42 (t, *J* = 2.4 Hz, 3H), 1.14 (s, 1H), 1.12 – 1.02 (m, 2H), 1.02 – 0.89 (m, 2H), 0.55 (t, *J* = 7.3 Hz, 3H).<sup>2</sup>

*N*-(4-(trifluoromethyl)benzyl)but-2-yn-1-amine (**15n**). <sup>1</sup>H NMR (400 MHz, CDCl<sub>3</sub>) δ: 7.58 (d, *J* = 8.0 Hz, 2H), 7.47 (d, *J* = 8.1 Hz, 2H), 3.92 (s, 2H), 3.37 (q, *J* = 2.3 Hz, 2H), 1.84 (t, *J* = 2.3 Hz, 3H). <sup>13</sup>C NMR (101 MHz, CDCl<sub>3</sub>) δ: 143.84, 128.51, 125.59, 125.26, 79.50, 77.34, 77.02, 76.75, 51.86, 37.85, 3.42.<sup>2</sup>

*N*-(4-fluorobenzyl)but-2-yn-1-amine (**15o**). <sup>1</sup>H NMR (400 MHz, CDCl<sub>3</sub>) δ: 7.30 (d, *J* = 8.5, 5.6 Hz, 2H), 7.00 (t, *J* = 8.7 Hz, 2H), 3.82 (s, 2H), 3.35 (q, *J* = 2.3 Hz, 2H), 1.84 (t, *J* = 2.3 Hz, 3H), 1.62 (s, 1H). <sup>13</sup>C NMR (101 MHz, CDCl<sub>3</sub>) δ: 163.16, 160.72, 135.38, 135.34, 129.90, 129.82, 115.19, 114.98, 79.24, 76.97, 51.66, 37.69, 3.44.<sup>2</sup>

*N*-(4-methoxybenzyl)but-2-yn-1-amine (**15p**). <sup>1</sup>H NMR (400 MHz, CDCl<sub>3</sub>) δ: 7.15 (d, *J* = 8.5 Hz, 2H), 6.75 (d, *J* = 8.6 Hz, 2H), 3.67 (s, 2H), 3.63 (d, *J* = 0.7 Hz, 3H), 3.27 – 3.19 (m, 2H), 1.73 (t, *J* = 2.4 Hz, 3H). <sup>13</sup>C NMR (101 MHz, CDCl<sub>3</sub>) δ: 158.72, 131.81, 129.58, 113.78, 79.13, 77.19, 55.22, 51.89, 37.69, 3.52.<sup>9</sup>

*N*-(2-phenylpropan-2-yl)prop-2-yn-1-amine (**15q**). <sup>1</sup>H NMR (400 MHz, CDCl<sub>3</sub>) δ: 7.46 (dd, *J* = 8.3, 1.1 Hz, 2H), 7.37 (dd, *J* = 10.4, 5.0 Hz, 2H), 7.29 – 7.23 (m, 1H), 3.13 (d, *J* = 2.5 Hz, 2H), 2.20 (t, *J* = 2.5 Hz, 1H), 1.51 (s, 6H). <sup>13</sup>C NMR (101 MHz, CDCl<sub>3</sub>) δ: 146.5, 128.3, 126.5, 125.7, 83.1, 70.7, 56.2, 32.6, 29.4.

## 2 Catalytic Section

### 2.1 Optimization of the Reaction Conditions

Table S1 Optimization of bases in reactions <sup>a</sup>

| Entry | Base                                                | Solvent | T (°C)/t (h) | Yields (%) <sup>b</sup> | TOF (h <sup>-1</sup> ) |
|-------|-----------------------------------------------------|---------|--------------|-------------------------|------------------------|
| 1     | NaO <sup>t</sup> Bu                                 | DMF     | 70/1 (2)     | 60 (100)                | 60 (100)               |
| 2     | NaO <sup>t</sup> Bu                                 | MeCN    | 70/6         | 45                      | 7.5                    |
| 3     | NaO <sup>t</sup> Bu                                 | MeOH    | 70/6         | 56                      | 9.5                    |
| 4     | NaO <sup>t</sup> Bu                                 | EtOH    | 70/1 (2)     | 96 (100)                | 96 (100)               |
| 5     | NaO <sup>t</sup> Bu                                 | Dioxane | 70/6         | 15                      | 2.5                    |
| 6     | NaO <sup>t</sup> Bu                                 | THF     | 70/6         | 33                      | 5.5                    |
| 7     | NaO <sup>t</sup> Bu                                 | DMSO    | 70/1         | 100 (93 <sup>c</sup> )  | 100 (930)              |
| 8     | KOH                                                 | DMSO    | 70/2         | 65 <sup>c</sup>         | 325                    |
| 9     | NaOH                                                | DMSO    | 70/2         | 52 <sup>c</sup>         | 260                    |
| 10    | NaOAc                                               | DMSO    | 70/2         | 57 <sup>c</sup>         | 285                    |
| 11    | Na <sub>3</sub> PO <sub>4</sub> ·12H <sub>2</sub> O | DMSO    | 70/2         | 49 <sup>c</sup>         | 245                    |
| 12    | Na <sub>2</sub> CO <sub>3</sub>                     | DMSO    | 70/2         | 63 <sup>c</sup>         | 315                    |
| 13    | NaHCO <sub>3</sub>                                  | DMSO    | 70/2         | 38 <sup>c</sup>         | 190                    |
| 14    | K <sub>2</sub> CO <sub>3</sub>                      | DMSO    | 70/2         | 83 <sup>c</sup>         | 415                    |
| 15    | Et <sub>3</sub> N                                   | DMSO    | 70/2         | N.R. <sup>d</sup>       | /                      |
| 16    | Base-free                                           | DMSO    | 70/2         | N.R.                    | /                      |
| 17    | NaO <sup>t</sup> Bu                                 | DMSO    | 60/1         | 43 <sup>c</sup>         | 860                    |

<sup>a</sup>The reactions were carried out with **13a** (0.1 mmol), Cat. **10** (1.0 mol %), dilute CO<sub>2</sub> (bubbling), NaO<sup>t</sup>Bu (0.15 mmol), DMSO (2.0 mL) and stirred at 70 °C, unless noted otherwise. <sup>b</sup>Determined by <sup>1</sup>H NMR. <sup>c</sup>Catalyst (0.1 mol %). <sup>d</sup>N.R. = no reaction. <sup>e</sup>Catalyst (0.05 mol %) at 60 °C for 1 h.

Table S2 Screening of the reaction temperatures <sup>a</sup>

| Entry | T (°C)/t (h) | Yields (%) <sup>b</sup> | TOF (h <sup>-1</sup> ) |
|-------|--------------|-------------------------|------------------------|
| 1     | RT           | 74                      | 74                     |
| 2     | 30           | 85                      | 85                     |
| 3     | 40           | 89                      | 89                     |
| 4     | 50           | 97                      | 97                     |
| 5     | 60           | 100                     | 100                    |
| 6     | 70           | 100                     | 100                    |
| 7     | 80           | 86                      | 86                     |
| 8     | 90           | 74                      | 74                     |

<sup>a</sup>The reactions were carried out with **13a** (0.1 mmol), Cat. **9** (1.0 mol %), dilute CO<sub>2</sub> (bubbling), NaO<sup>t</sup>Bu (0.15 mmol), DMSO (2.0 mL) and stirred at different temperatures for 1.0 hour, unless noted otherwise. <sup>b</sup>Determined by <sup>1</sup>H NMR.

## 2.2 Comparison of Turnover Frequency with Other Reported Catalysts

Table S3 Comparison with the TOFs of previously catalytic systems <sup>a</sup>

| Entry | Catalyst                               | T (°C)/t (h) | P (atm) <sup>b</sup> | TOF (h <sup>-1</sup> ) | Ref.   |
|-------|----------------------------------------|--------------|----------------------|------------------------|--------|
| 1     | AcGlu-Im-PdCl <sub>4</sub> <b>10</b>   | 60/0.5       | 0.15                 | 1440                   | Herein |
| 2     | CuI/DBU                                | 50/4         | 1.0                  | 2                      | 10     |
| 3     | AgOAc                                  | 25/7         | 1.0                  | 7                      | 11     |
| 4     | AgNO <sub>3</sub> /DBU                 | 60/2         | 1.0                  | 94                     | 12     |
| 5     | CoBr <sub>2</sub> /TBD                 | 80/9         | 1.0                  | 1                      | 13     |
| 6     | ZnCl <sub>2</sub> (TBD) <sub>2</sub>   | 60/12        | 1.0                  | 2                      | 14     |
| 7     | Ag <sub>27</sub> -MOF                  | 25/6         | 1.0                  | 16                     | 15     |
| 8     | TOS-Ag <sub>4</sub>                    | 25/24        | 1.0                  | 4                      | 16     |
| 9     | Zn <sub>116</sub>                      | 70/12        | 1.0                  | 31                     | 17     |
| 10    | PdSCS                                  | 50/0.33      | 1.0                  | 60                     | 18     |
| 11    | Ag@TpPa-1                              | 60/18        | 1.0                  | 17                     | 19     |
| 12    | Ag@2,6-FPP-TAPT                        | 50/2         | 1.0                  | 964                    | 20     |
| 13    | Cu <sub>2</sub> O@ZIF-8                | 40/6         | 1.0                  | 3.3                    | 21     |
| 14    | Cu <sup>I</sup> /Cu <sup>II</sup> -MOF | 30/0.17      | 1.0                  | 230                    | 22     |
| 15    | Pd@BBA-2                               | 40/2         | 1.0                  | 43.68                  | 23     |
| 15    | AuCl(IPr)                              | 40/15        | 1.0                  | 3.03                   | 24     |
| 16    | AgCl(IPr)                              | 40/15        | 1.0                  | 3.03                   | 25     |
| 17    | [Au]                                   | RT/24        | air                  | 5.33                   | 26     |
| 18    | Ag-HMP-2                               | 60/20        | 1.0                  | 10.6                   | 27     |
| 19    | Ag-MOF-1                               | RT/24        | 1.0                  | 0.56                   | 28     |
| 20    | 2Gn[TEG][Au]                           | RT/24        | 1.0                  | 1.77                   | 29     |

<sup>a</sup>TOF is calculated directly using the optimal conditions given in the literature.



### 2.3 General Procedure for Pd-catalyzed Carboxylative Cyclization of CO<sub>2</sub> with Propargyl Amines.

The carboxylative cyclization of dilute CO<sub>2</sub> with *N*-(4-(trifluoromethyl)benzyl)prop-2-yn-1-amine (**15a**) into 5-methylene-3-(4-(trifluoromethyl)benzyl)oxazolidin-2-one (**16a**) was carried out in DMSO. AcGlu-Im-PdCl<sub>4</sub> (1.0 mol%), **15a** (13.5 mg, 0.05 mmol), and NaO<sup>t</sup>Bu (3.6 mg, 0.075 mmol) were added to DMSO (2.0 mL) in the reaction tube (10 mL). dilute CO<sub>2</sub> (bubbling, CO<sub>2</sub>/N<sub>2</sub>, Vol/Vol = 15:85) was introduced into the reaction mixture with stirring using a long hollow needle (φ 0.7 × 200 mm). The reaction mixture was stirred in a preheated 60 °C oil bath for 1.0 h. After the reaction stopped, the mixture was transferred to ethyl acetate solution (10 mL) and water (5.0 mL), the mixture was stirred for 10 min, then extracted with ethyl acetate (3 × 5.0 mL). The combined organic layers were dried over Mg<sub>2</sub>SO<sub>4</sub> and filtered, the organic solution was concentrated in vacuo to give the crude product, and the yield was determined by <sup>1</sup>H NMR, the pure **16a** was purified by flash chromatograph (V<sub>PE</sub> : V<sub>EA</sub> = 30:1 – 20:1).

## 2.4 NMR Data of 2-Oxazolidinones 16a-16q.

### 5-methylene-3-(4-(trifluoromethyl)benzyl)oxazolidin-2-one (16a)

<sup>1</sup>H NMR (400 MHz, CDCl<sub>3</sub>): δ 7.63 (d, *J* = 8.1 Hz, 2H), 7.41 (d, *J* = 8.0 Hz, 2H), 4.78 (dd, *J* = 5.8, 2.6 Hz, 1H), 4.53 (s, 2H), 4.28 (dt, *J* = 3.2, 2.2 Hz, 1H), 4.05 (t, *J* = 2.4 Hz, 2H). <sup>13</sup>C NMR (101 MHz, CDCl<sub>3</sub>): δ 155.7, 148.5, 139.1, 128.4, 126.0, 87.3, 47.4.<sup>3</sup>

### 3-(cyclohexylmethyl)-5-methyleneoxazolidin-2-one (16b)

<sup>1</sup>H NMR (400 MHz, CDCl<sub>3</sub>): δ 4.74 (q, *J* = 2.7 Hz, 1H), 4.28 (dd, *J* = 5.2, 2.2 Hz, 1H), 4.17 (t, *J* = 2.4 Hz, 2H), 3.13 (d, *J* = 7.3 Hz, 2H), 1.77 – 1.65 (m, 5H), 1.59 (dtd, *J* = 15.0, 7.4, 3.8 Hz, 1H), 1.28 – 1.17 (m, 3H), 0.97 (td, *J* = 11.7, 6.2 Hz, 2H). <sup>13</sup>C NMR (101 MHz, CDCl<sub>3</sub>): δ 155.9, 149.21, 86.3, 50.2, 48.7, 36.0, 30.5, 26.2, 25.6.<sup>30</sup>

### 3-(2,6-difluorobenzyl)-5-methyleneoxazolidin-2-one (16c)

Light yellow liquid, 99%. <sup>1</sup>H NMR (400 MHz, CDCl<sub>3</sub>): δ 7.34 (tt, *J* = 8.4, 6.5 Hz, 1H), 7.02 – 6.88 (m, 2H), 4.74 (dd, *J* = 5.6, 2.7 Hz, 1H), 4.63 (s, 2H), 4.27 (dd, *J* = 5.3, 2.2 Hz, 1H), 4.10 (t, *J* = 2.3 Hz, 2H). <sup>13</sup>C NMR (101 MHz, CDCl<sub>3</sub>): δ 162.9, 162.8, 160.4, 160.4, 154.9, 148.8, 130.7, 130.63, 130.5, 111.8, 111.7, 111.6, 111.5, 110.7, 110.5, 86.8, 47.4, 35.2, 35.2, 35.1, 31.5, 30.1, 1.0. LC–HR/MS (ESI-QTOF) *m/z*: [M–H]<sup>+</sup> calcd for C<sub>11</sub>H<sub>8</sub>F<sub>2</sub>NO<sub>2</sub>, 224.0601; found, 224.0603.

### 3-(4-chlorobenzyl)-5-methyleneoxazolidin-2-one (16d)

<sup>1</sup>H NMR (400 MHz, CDCl<sub>3</sub>): δ 7.36 – 7.27 (m, 2H), 7.24 – 7.16 (m, 2H), 4.72 (dd, *J* = 5.6, 2.7 Hz, 1H), 4.41 (s, 2H), 4.24 (dd, *J* = 5.3, 2.2 Hz, 1H), 4.01 (t, *J* = 2.4 Hz, 2H). <sup>13</sup>C NMR (101 MHz, CDCl<sub>3</sub>): δ 155.5, 148.6, 134.0, 133.5, 129.4, 129.0, 86.9, 47.1, 47.1.<sup>3</sup>

### 3-(3-methoxybenzyl)-5-methyleneoxazolidin-2-one (16e)

Yellow oil, 86%. <sup>1</sup>H NMR (400 MHz, CDCl<sub>3</sub>): δ 7.27 (dd, *J* = 10.3, 5.4 Hz, 1H), 6.91 – 6.76 (m, 3H), 4.72 (dd, *J* = 5.7, 2.7 Hz, 1H), 4.42 (d, *J* = 3.5 Hz, 2H), 4.24 (dt, *J* = 3.0, 2.2 Hz, 1H), 4.03 (t, *J* = 2.4 Hz, 2H), 3.80 (s, 3H). <sup>13</sup>C NMR (101 MHz, CDCl<sub>3</sub>): δ 160.1, 155.6, 149.0, 136.6, 130.0, 120.3, 113.7, 113.6, 86.7, 55.3, 47.8, 47.3. LC–HR/MS (ESI-QTOF) *m/z*: [M–H]<sup>+</sup> calcd for C<sub>12</sub>H<sub>12</sub>NO<sub>3</sub>, 218.0895; found, 218.0893.

**3-(4-bromobenzyl)-5-methyleneoxazolidin-2-one (16f)**

<sup>1</sup>H NMR (400 MHz, CDCl<sub>3</sub>): δ 7.55 – 7.43 (m, 2H), 7.21 – 7.11 (m, 2H), 4.75 (dd, *J* = 5.7, 2.6 Hz, 1H), 4.42 (s, 2H), 4.26 (dt, *J* = 3.2, 2.2 Hz, 1H), 4.03 (t, *J* = 2.4 Hz, 2H). <sup>13</sup>C NMR (101 MHz, CDCl<sub>3</sub>): δ 155.6, 148.7, 134.1, 132.1, 129.8, 122.3, 87.0, 47.2, 47.2, 47.1.<sup>31</sup>

**(R)-5-methylene-3-(1-phenylethyl)oxazolidin-2-one (16g)**

Light yellow liquid, 100%. <sup>1</sup>H NMR (400 MHz, CDCl<sub>3</sub>): δ 7.36 (qdd, *J* = 6.9, 5.4, 1.8 Hz, 5H), 5.27 (q, *J* = 7.1 Hz, 1H), 4.72 (dd, *J* = 5.6, 2.7 Hz, 1H), 4.29 – 4.21 (m, 1H), 4.12 (dt, *J* = 14.2, 2.4 Hz, 1H), 3.79 (dt, *J* = 14.2, 2.4 Hz, 1H), 1.61 (d, *J* = 7.1 Hz, 3H). <sup>13</sup>C NMR (101 MHz, CDCl<sub>3</sub>): δ 155.1, 149.3, 138.9, 128.9, 128.2, 127.0, 86.5, 51.4, 43.7, 16.4. LC–HR/MS (ESI-QTOF) *m/z*: [M-H]<sup>+</sup> calcd for C<sub>12</sub>H<sub>12</sub>NO<sub>2</sub>, 202.0946; found, 202.0948.

**(S)-5-methylene-3-(1-phenylethyl)oxazolidin-2-one (16h)**

Yellow oil, 100%. <sup>1</sup>H NMR (400 MHz, CDCl<sub>3</sub>): δ 7.55 – 7.29 (m, 5H), 5.27 (q, *J* = 7.1 Hz, 1H), 4.72 (q, *J* = 2.7 Hz, 1H), 4.23 (dd, *J* = 5.3, 2.2 Hz, 1H), 4.12 (dt, *J* = 14.2, 2.4 Hz, 1H), 3.79 (dt, *J* = 14.2, 2.4 Hz, 1H), 1.61 (d, *J* = 7.1 Hz, 3H). <sup>13</sup>C NMR (101 MHz, CDCl<sub>3</sub>): δ 155.1, 149.3, 138.9, 128.9, 128.2, 127.0, 86.5, 51.4, 43.7, 16.4. LC–HR/MS (ESI-QTOF) *m/z*: [M-H]<sup>+</sup> calcd for C<sub>12</sub>H<sub>12</sub>NO<sub>2</sub>, 202.0946; found, 202.0948.

**3-butyl-5-methyleneoxazolidin-2-one (16i)**

<sup>1</sup>H NMR (400 MHz, CDCl<sub>3</sub>): δ 4.75 (q, *J* = 2.7 Hz, 1H), 4.29 (dd, *J* = 5.2, 2.2 Hz, 1H), 4.17 (t, *J* = 2.4 Hz, 2H), 3.31 (t, *J* = 7.3 Hz, 2H), 1.60 – 1.51 (m, 2H), 1.36 (dd, *J* = 15.1, 7.4 Hz, 2H), 0.96 (t, *J* = 7.3 Hz, 3H). <sup>13</sup>C NMR (101 MHz, CDCl<sub>3</sub>): δ 155.6, 149.2, 86.3, 47.8, 43.5, 29.3, 19.8, 13.6.<sup>32</sup>

**3-(4-fluorobenzyl)-5-methyleneoxazolidin-2-one (16j)**

<sup>1</sup>H NMR (400 MHz, CDCl<sub>3</sub>): δ 7.30 – 7.24 (m, 2H), 7.12 – 6.97 (m, 2H), 4.74 (dd, *J* = 5.7, 2.7 Hz, 1H), 4.44 (s, 2H), 4.26 (dt, *J* = 3.1, 2.2 Hz, 1H), 4.03 (t, *J* = 2.4 Hz, 2H). <sup>13</sup>C NMR (101 MHz, CDCl<sub>3</sub>): δ 161.4, 155.6, 148.8, 130.9, 129.9, 115.9, 86.9, 47.2, 47.1.<sup>3</sup>

**3-benzyl-5-methyleneoxazolidin-2-one (16k)**

<sup>1</sup>H NMR (400 MHz, CDCl<sub>3</sub>): δ 7.44 – 7.23 (m, 5H), 4.74 (dd, *J* = 5.7, 2.7 Hz, 1H), 4.47 (s, 2H), 4.25 (dt, *J* = 3.1, 2.2 Hz, 1H), 4.03 (t, *J* = 2.4 Hz, 2H). <sup>13</sup>C NMR (101 MHz, CDCl<sub>3</sub>): δ 155.7, 149.0, 135.0, 129.0, 128.3, 128.2, 86.8, 47.9, 47.2.<sup>3</sup>

**3-(4-methoxybenzyl)-5-methyleneoxazolidin-2-one (16l)**

<sup>1</sup>H NMR (400 MHz, CDCl<sub>3</sub>) δ: 7.26 – 7.16 (m, 2H), 6.95 – 6.85 (m, 2H), 4.73 (dd, *J* = 5.7, 2.7 Hz, 1H), 4.41 (s, 2H), 4.24 (dt, *J* = 3.0, 2.2 Hz, 1H), 4.01 (t, *J* = 2.4 Hz, 2H), 3.81 (s, 3H).

<sup>13</sup>C NMR (101 MHz, CDCl<sub>3</sub>) δ: 159.6, 155.6, 149.1, 129.6, 127.0, 114.3, 86.6, 55.3, 47.2.<sup>3</sup>

**(E)-3-butyl-5-ethylideneoxazolidin-2-one (16m)**

Light yellow liquid, 100%. <sup>1</sup>H NMR (400 MHz, CDCl<sub>3</sub>) δ: 4.53 (qd, *J* = 6.9, 4.8 Hz, 1H), 4.02 (dd, *J* = 4.4, 2.2 Hz, 2H), 3.22 (t, *J* = 7.3 Hz, 2H), 1.61 (dt, *J* = 6.9, 2.2 Hz, 3H), 1.51 – 1.42 (m, 2H), 1.31 – 1.22 (m, 2H), 0.87 (t, *J* = 7.3 Hz, 3H). LC–HR/MS (ESI-QTOF) *m/z*: [M-H]<sup>+</sup> calcd for C<sub>9</sub>H<sub>14</sub>NO<sub>2</sub>, 168.1103; found, 168.1101.

**(E)-5-ethylidene-3-(4-(trifluoromethyl)benzyl)oxazolidin-2-one (16n)**

Light yellow liquid, 83%. <sup>1</sup>H NMR (400 MHz, CDCl<sub>3</sub>) δ: 7.61 (d, *J* = 8.1 Hz, 2H), 7.45 (d, *J* = 8.0 Hz, 2H), 4.78 (dd, *J* = 4.3, 3.2 Hz, 1H), 4.63 (s, 2H), 3.71 (dq, *J* = 3.7, 1.8 Hz, 2H), 1.87 (dd, *J* = 3.0, 1.8 Hz, 3H). <sup>13</sup>C NMR (101 MHz, CDCl<sub>3</sub>) δ: 156.1, 141.2, 139.3, 128.3, 126.0, 125.9, 125.9, 125.8, 98.1, 47.4, 47.2, 9.9. LC–HR/MS (ESI-QTOF) *m/z*: [M-H]<sup>+</sup> calcd for C<sub>13</sub>H<sub>11</sub>F<sub>3</sub>NO<sub>2</sub>, 271.0820; found, 271.0822.<sup>33</sup>

**(E)-5-ethylidene-3-(4-fluorobenzyl)oxazolidin-2-one (16o)**

Light yellow liquid, 86%. <sup>1</sup>H NMR (400 MHz, CDCl<sub>3</sub>) δ: 7.26 (dt, *J* = 4.8, 4.1 Hz, 2H), 7.11 – 7.01 (m, 2H), 4.66 – 4.53 (m, 1H), 4.45 (s, 2H), 3.97 (p, *J* = 2.1 Hz, 2H), 1.68 (ddd, *J* = 9.6, 5.9, 3.7 Hz, 3H). <sup>13</sup>C NMR (101 MHz, CDCl<sub>3</sub>) δ: 163.8, 161.3, 156.0, 141.5, 131.0, 131.0, 130.0, 129.9, 116.0, 115.8, 97.8, 47.2, 47.0, 10.0. LC–HR/MS (ESI-QTOF) *m/z*: [M-H]<sup>+</sup> calcd for C<sub>12</sub>H<sub>11</sub>FNO<sub>2</sub>, 221.0852; found, 221.0850.

**(E)-5-ethylidene-3-(4-methoxybenzyl)oxazolidin-2-one (16p)**

Light yellow liquid, 99%. <sup>1</sup>H NMR (400 MHz, CDCl<sub>3</sub>) δ: 7.21 (d, *J* = 8.6 Hz, 2H), 6.90 (d, *J* = 8.6 Hz, 2H), 4.56 (qt, *J* = 6.9, 2.0 Hz, 1H), 4.41 (s, 2H), 3.99 – 3.91 (m, 2H), 3.82 (s, 3H), 1.68 (dt, *J* = 6.9, 2.2 Hz, 3H). <sup>13</sup>C NMR (101 MHz, CDCl<sub>3</sub>) δ: 159.5, 156.0, 141.8, 129.6, 127.2, 114.3, 97.5, 55.3, 47.3, 46.9, 9.9. LC–HR/MS (ESI-QTOF) *m/z*: [M-H]<sup>+</sup> calcd for C<sub>13</sub>H<sub>14</sub>NO<sub>3</sub>, 232.1052; found, 232.1050.<sup>33</sup>

**5-methylene-3-(2-phenylpropan-2-yl)oxazolidin-2-one (16q)**

Light yellow liquid, 100%. <sup>1</sup>H NMR (400 MHz, CDCl<sub>3</sub>) δ: 7.36 (dd, *J* = 10.0, 3.4 Hz, 4H), 7.32 – 7.26 (m, 1H), 4.66 (dd, *J* = 5.3, 2.6 Hz, 1H), 4.17 (dd, *J* = 4.8, 2.2 Hz, 1H), 4.07 (t, *J* =

2.3 Hz, 2H), 1.80 (s, 6H).  $^{13}\text{C}$  NMR (101 MHz,  $\text{CDCl}_3$ )  $\delta$ : 154.2, 148.9, 144.7, 128.7, 127.4, 125.1, 85.6, 77.3, 77.0, 76.7, 58.9, 47.4, 27.4.

## 2.5 NMR, FT-IR and HR-MS Spectra of Imidazolium Salts

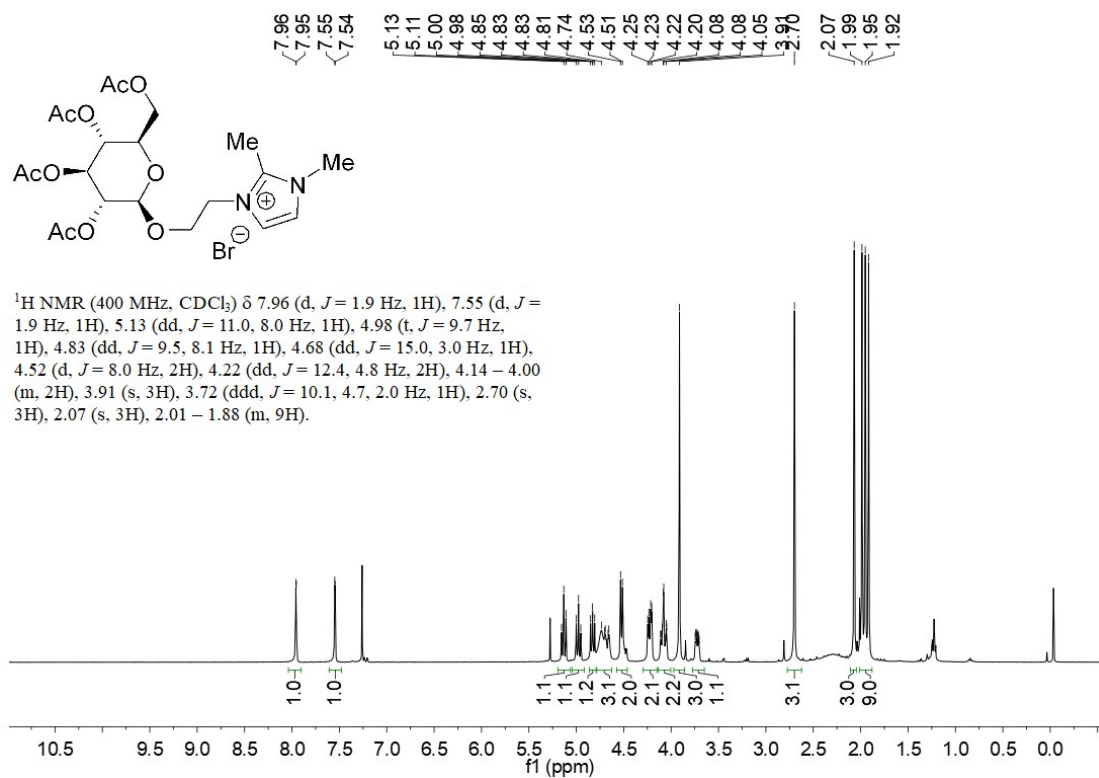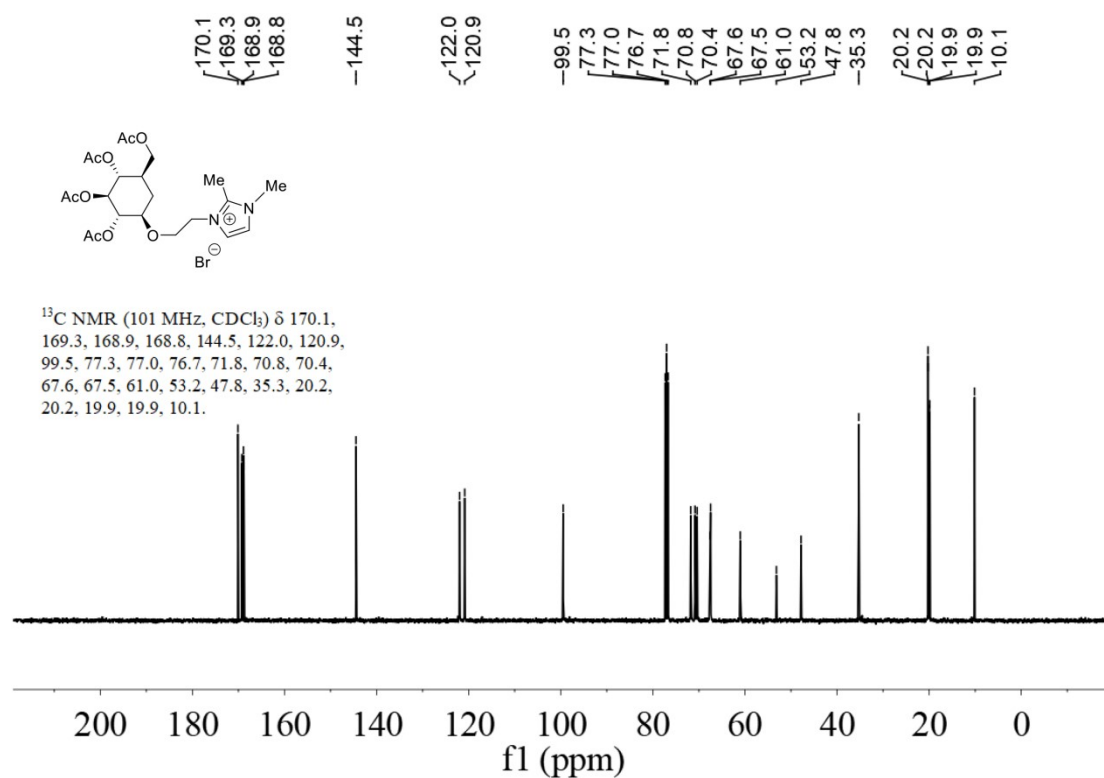

**Figure S1.** The  $^1\text{H}$  and  $^{13}\text{C}$  NMR spectra of AcGlu-Im-Br **1** in  $\text{CDCl}_3$ .

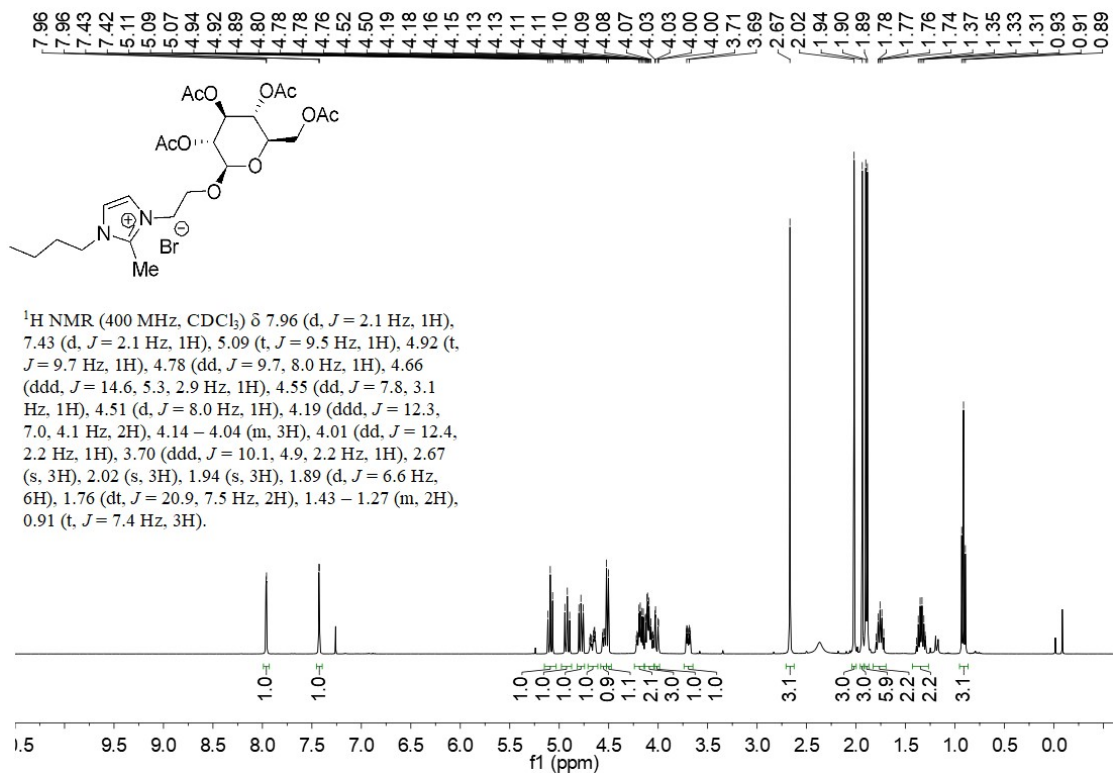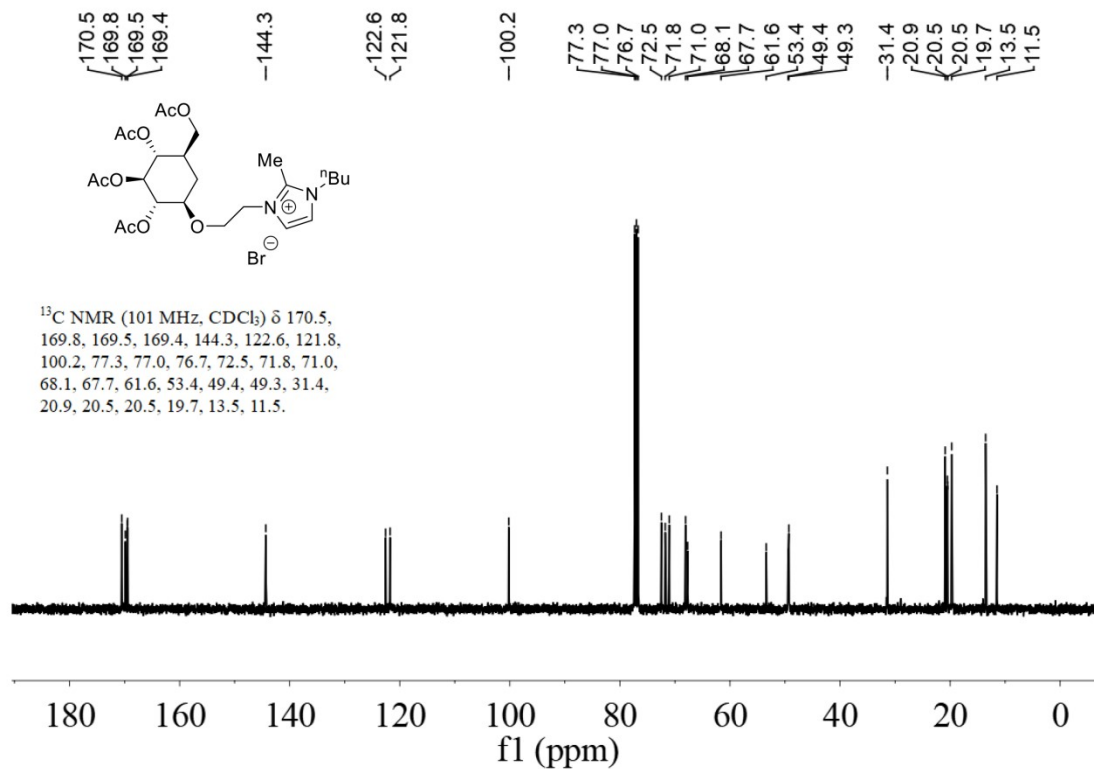

**Figure S2.** The  $^1\text{H}$  and  $^{13}\text{C}$  NMR spectra of AcGlu-Im-Br **2** in  $\text{CDCl}_3$ .

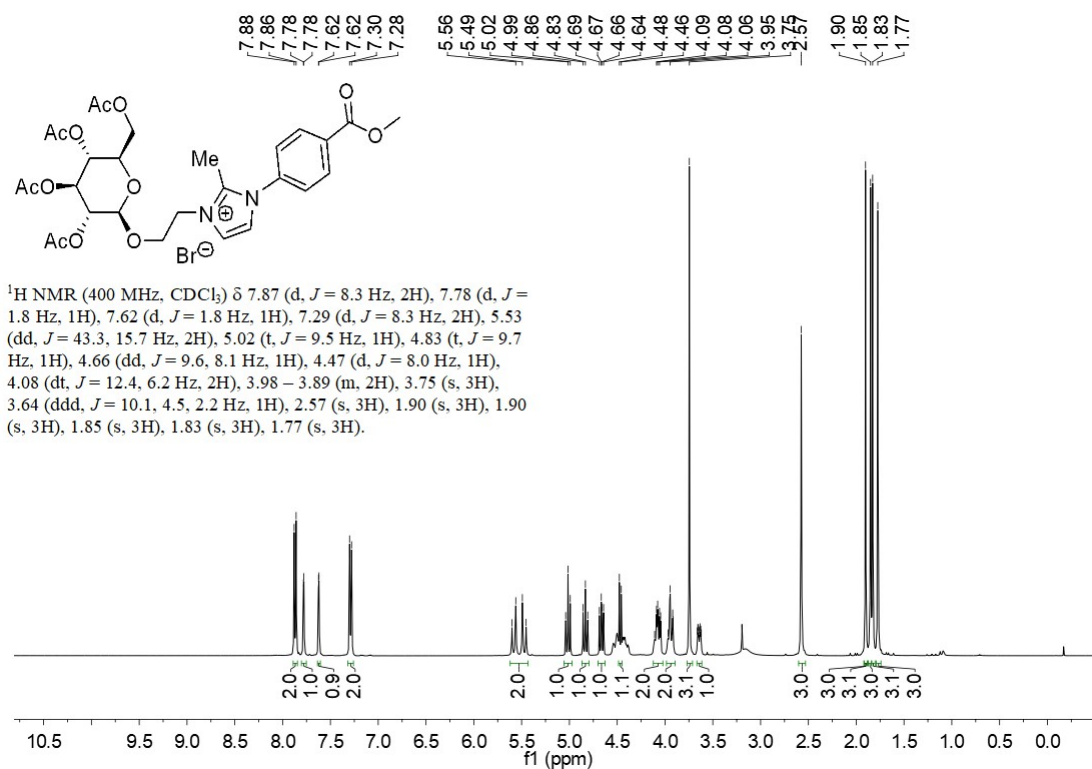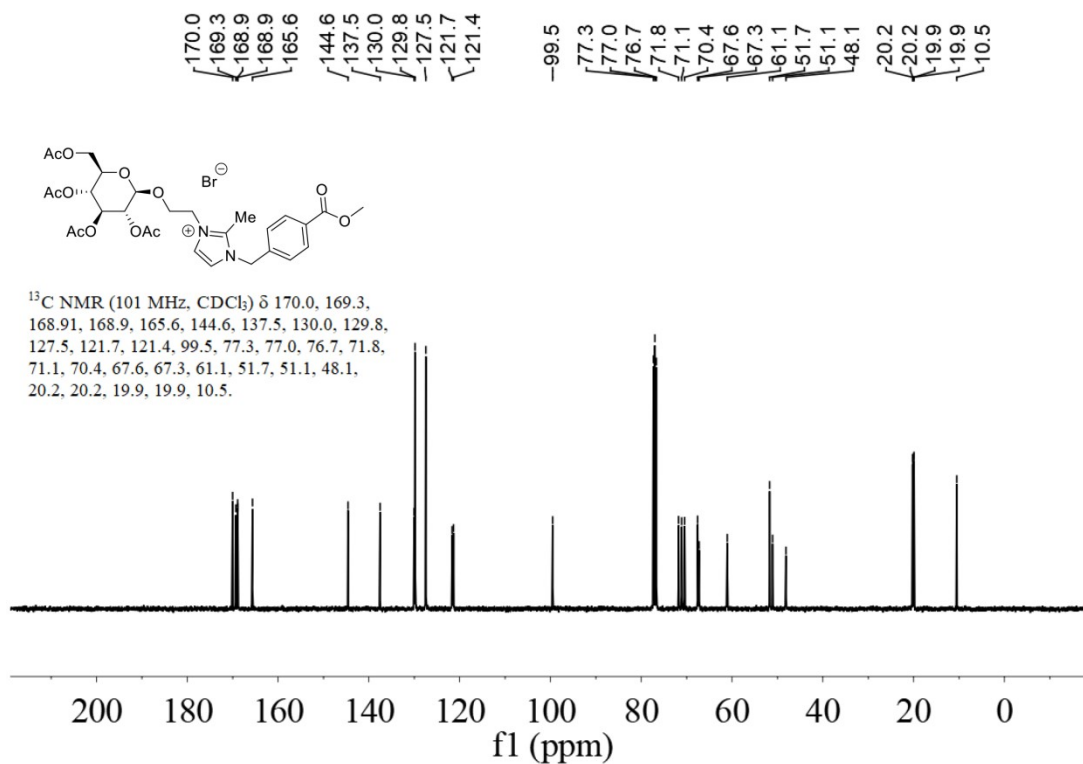

**Figure S3.** The <sup>1</sup>H and <sup>13</sup>C NMR spectra of AcGlu-Im-Br **3** in CDCl<sub>3</sub>.

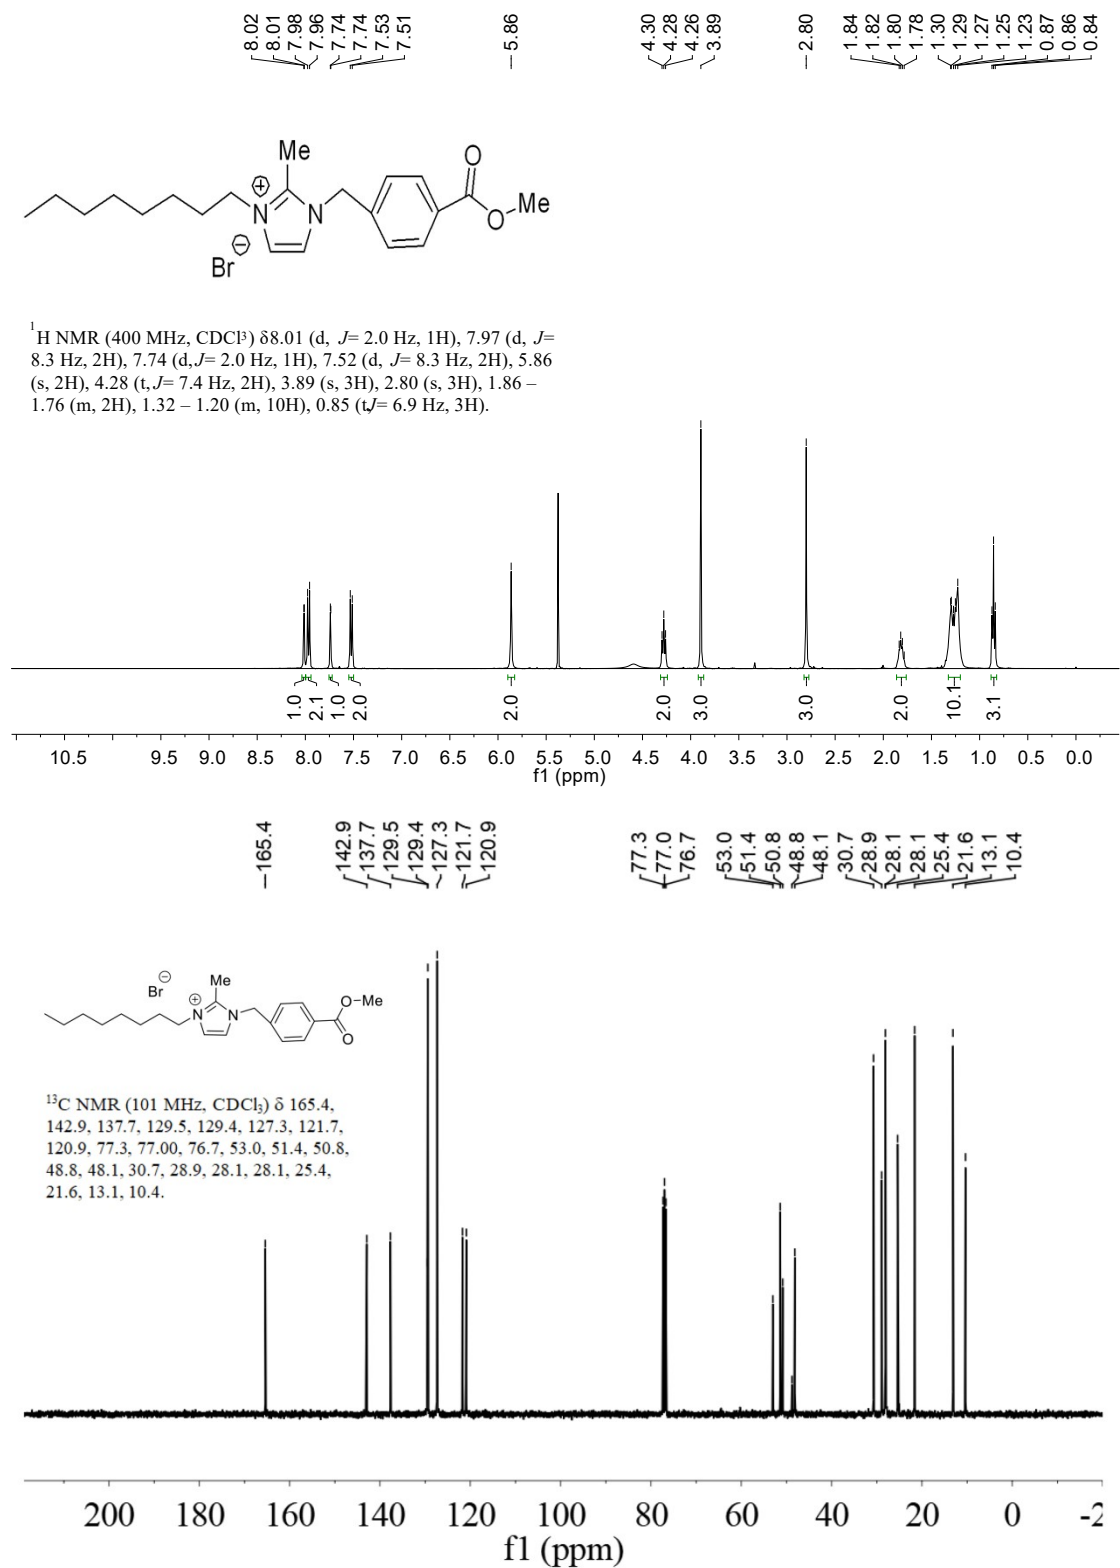

**Figure S4.** The <sup>1</sup>H and <sup>13</sup>C NMR spectra of Octyl-Im-Br 4 in CDCl<sub>3</sub>.



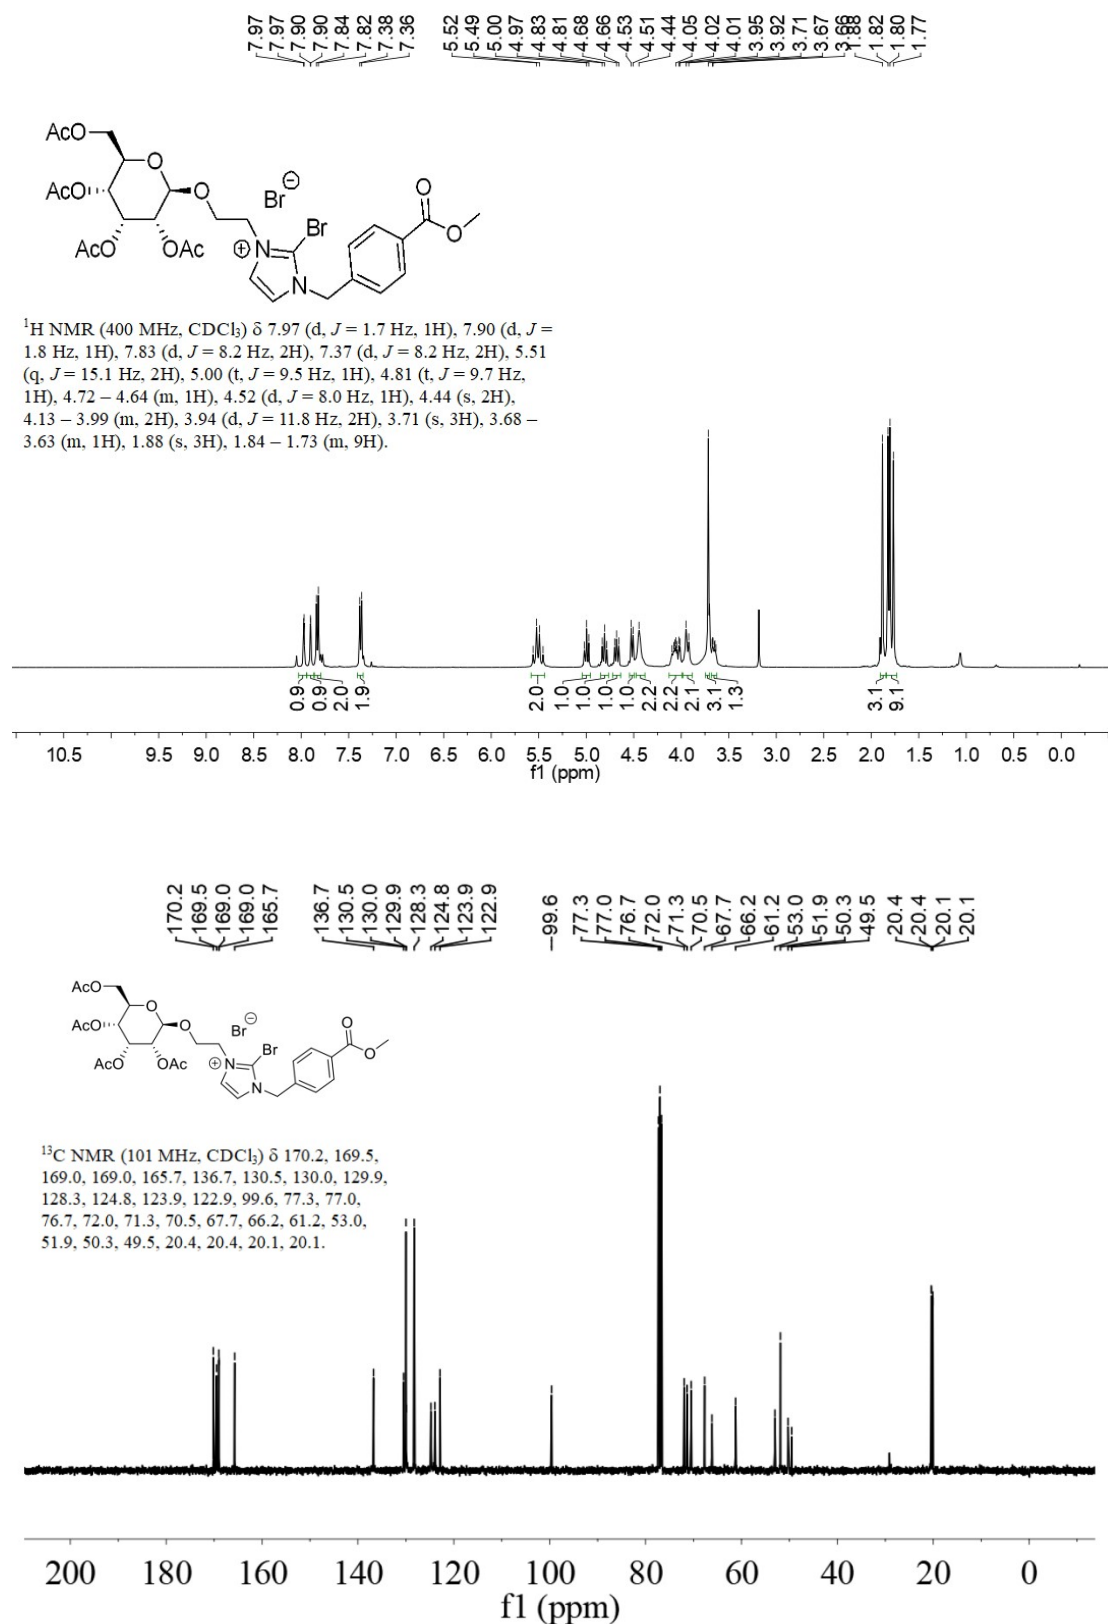

**Figure S5.** The <sup>1</sup>H and <sup>13</sup>C NMR spectra of AcGlu-Im-Br **5** in CDCl<sub>3</sub>.

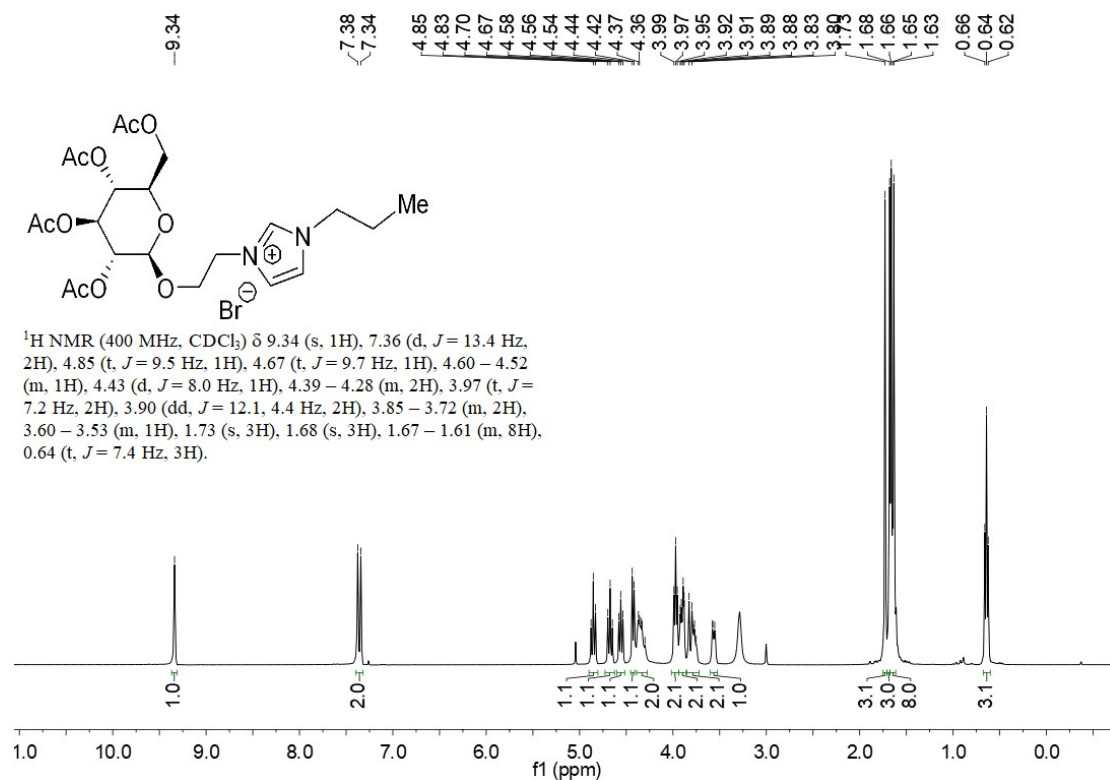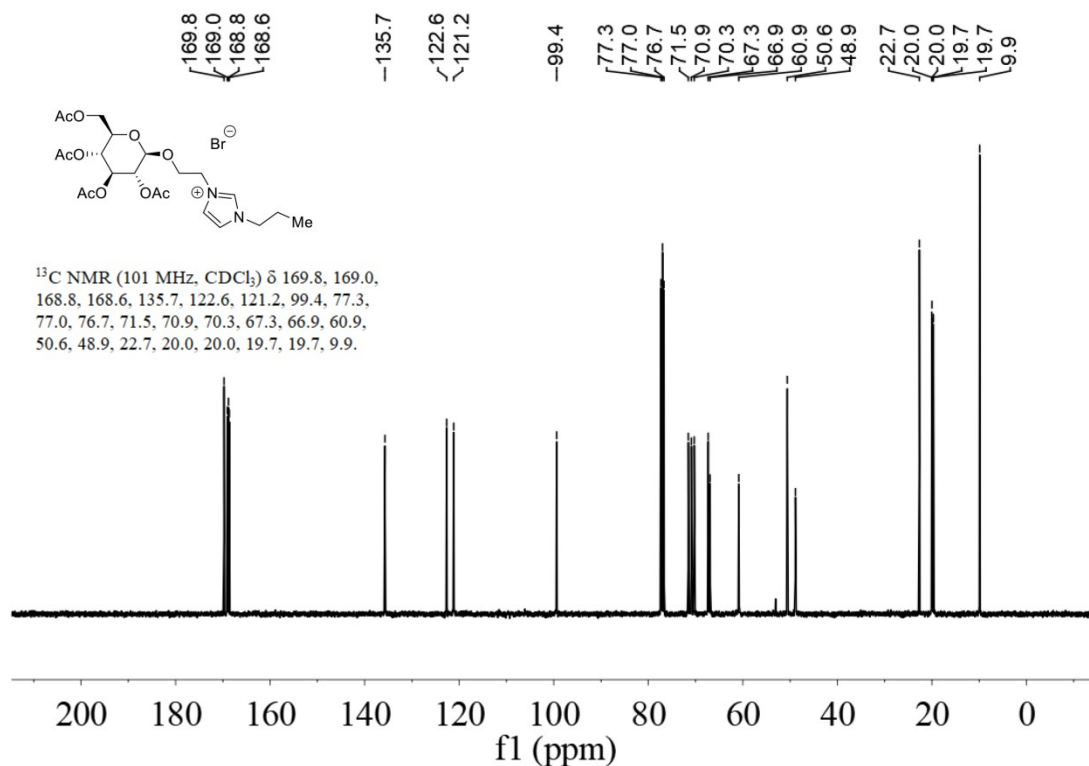

**Figure S6.** The <sup>1</sup>H and <sup>13</sup>C NMR spectra of AcGlu-Im-Br 6 in CDCl<sub>3</sub>.

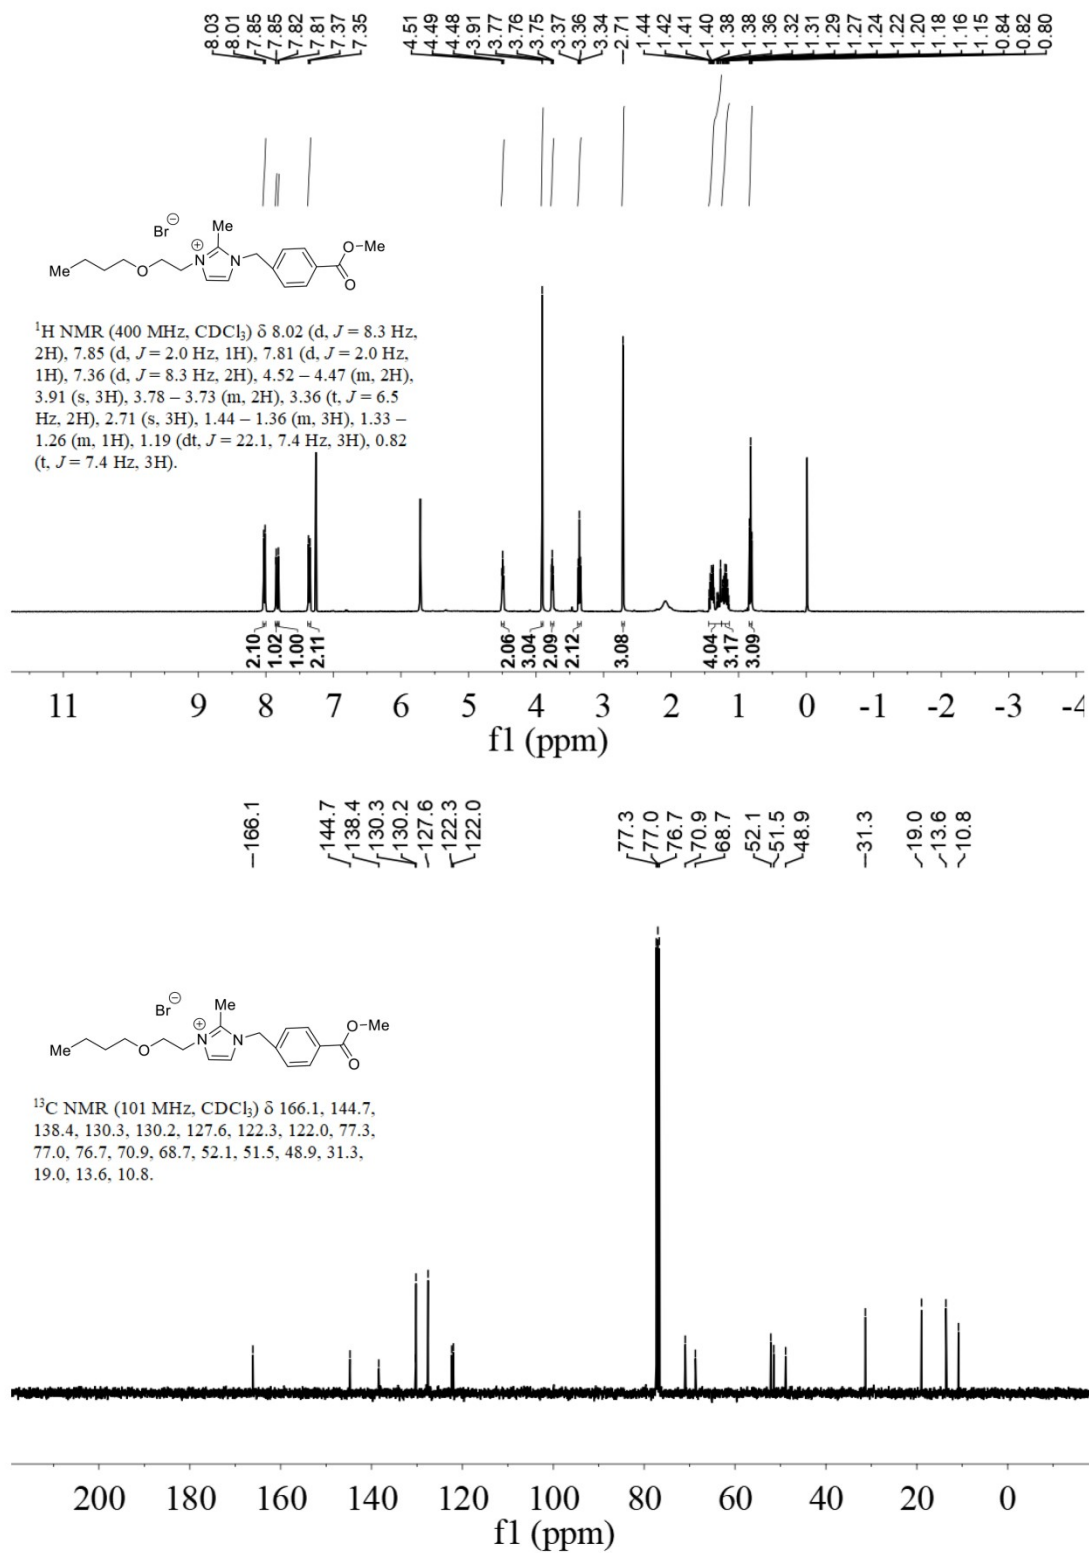

Figure S7. The <sup>1</sup>H and <sup>13</sup>C NMR spectra of BOE-Im-Br 7 in CDCl<sub>3</sub>.

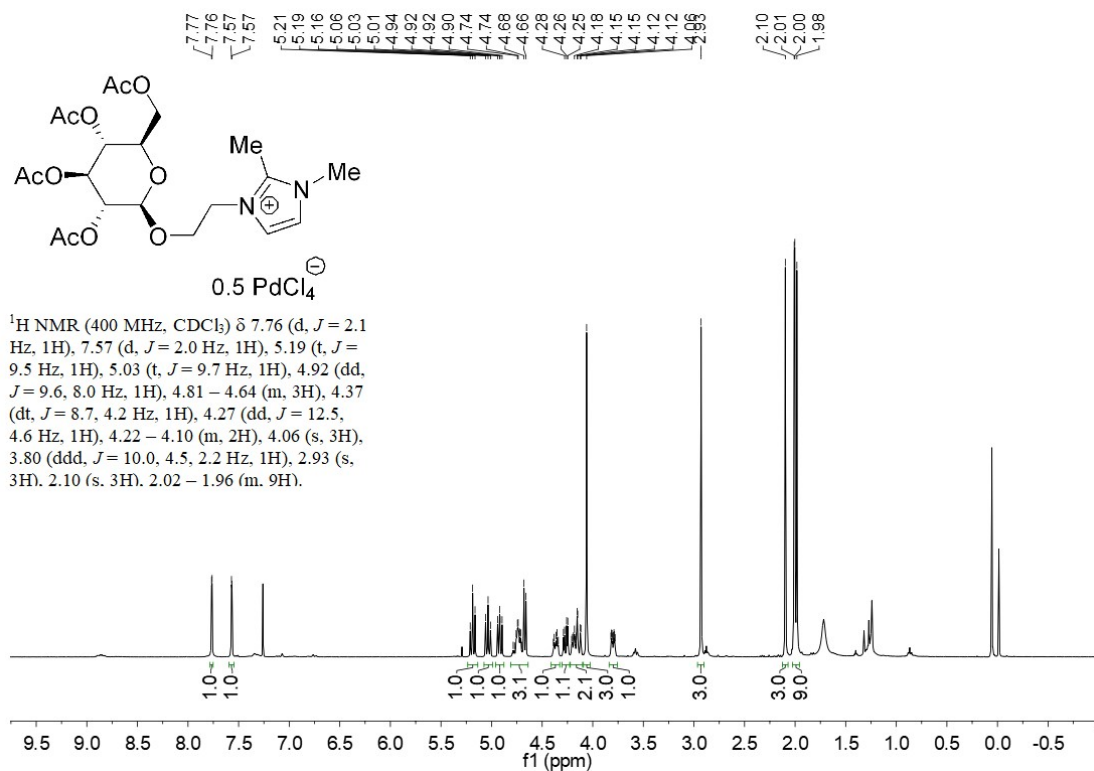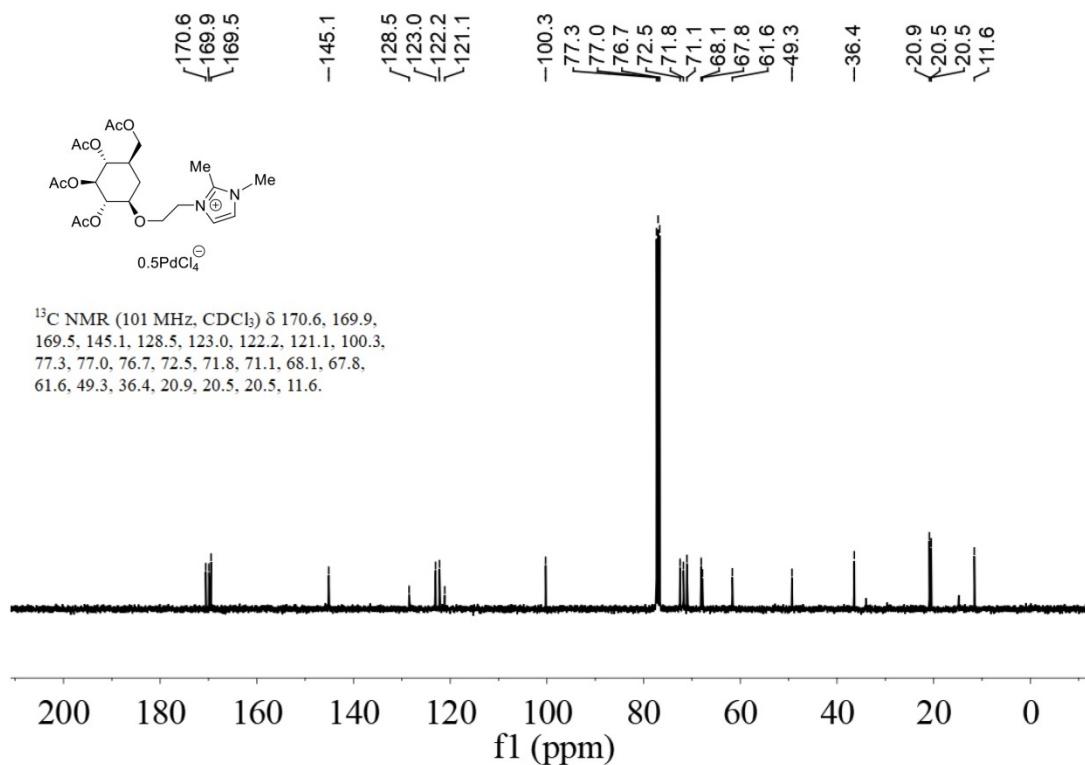

**Figure S8.** <sup>1</sup>H and <sup>13</sup>C NMR spectra of AcGlu-Im-PdCl<sub>4</sub> **8** in CDCl<sub>3</sub>.

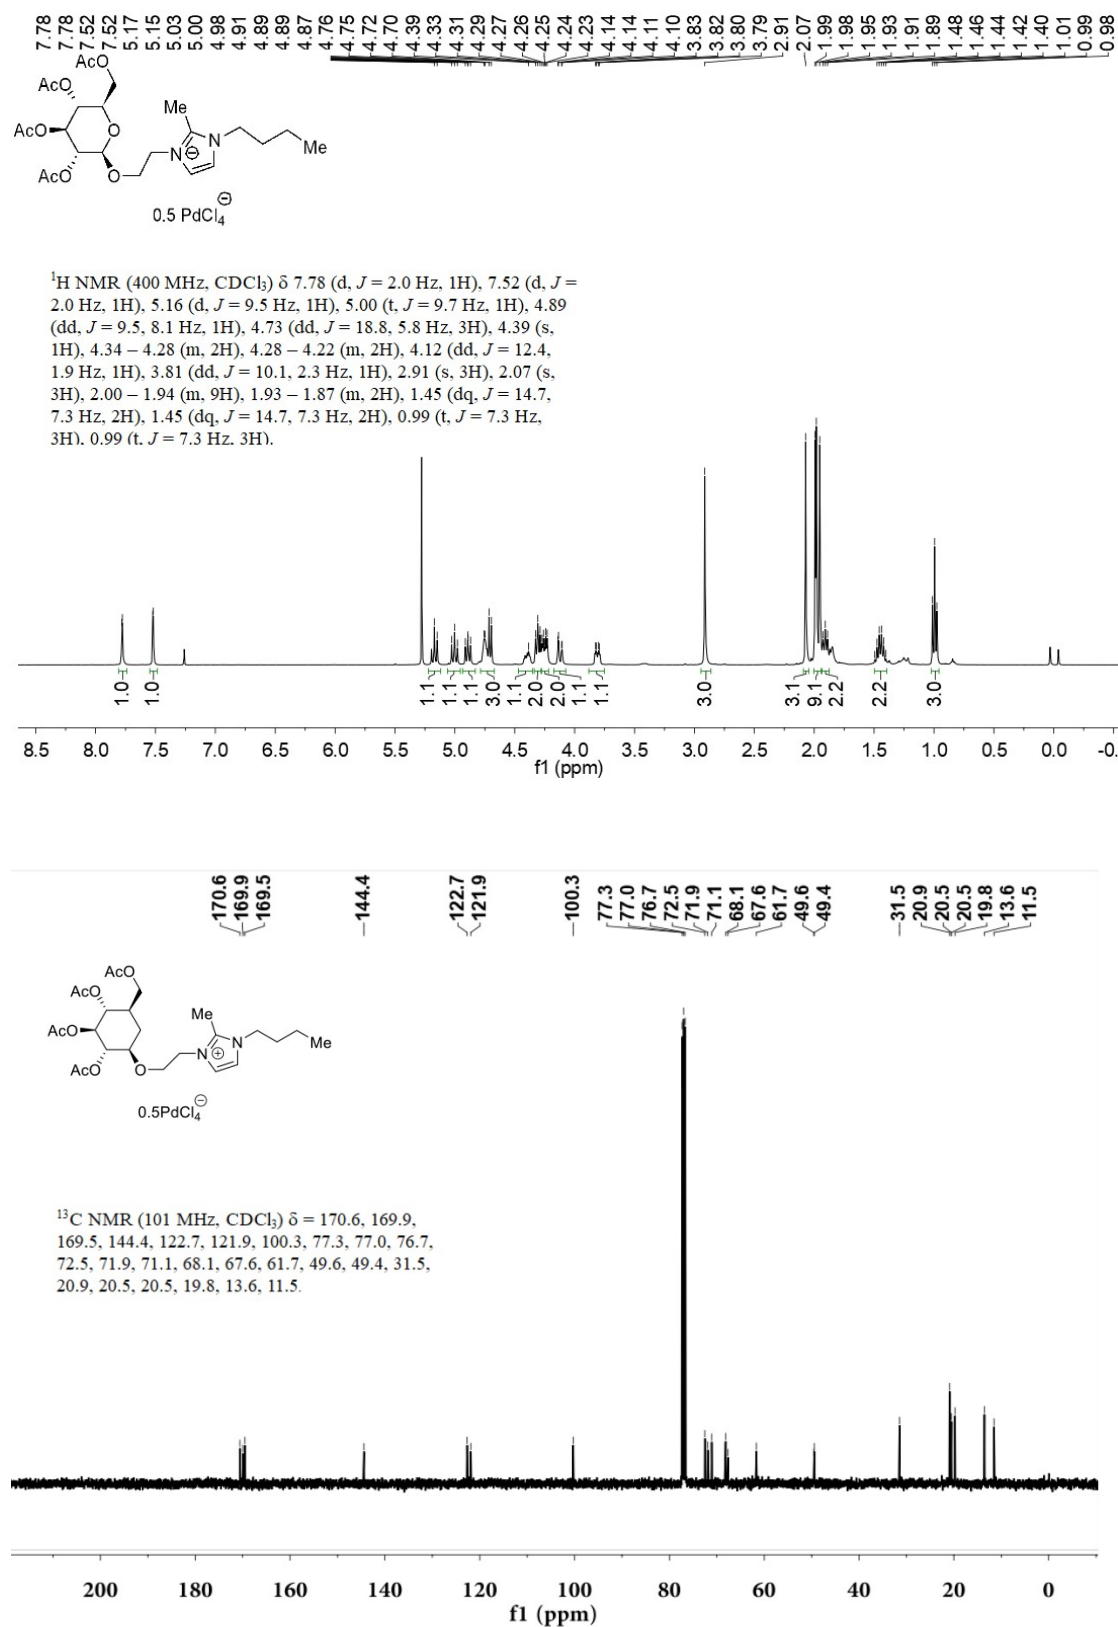

Figure S9. <sup>1</sup>H and <sup>13</sup>C NMR spectra of AcGlu-Im-PdCl<sub>4</sub> **9** in CDCl<sub>3</sub>.

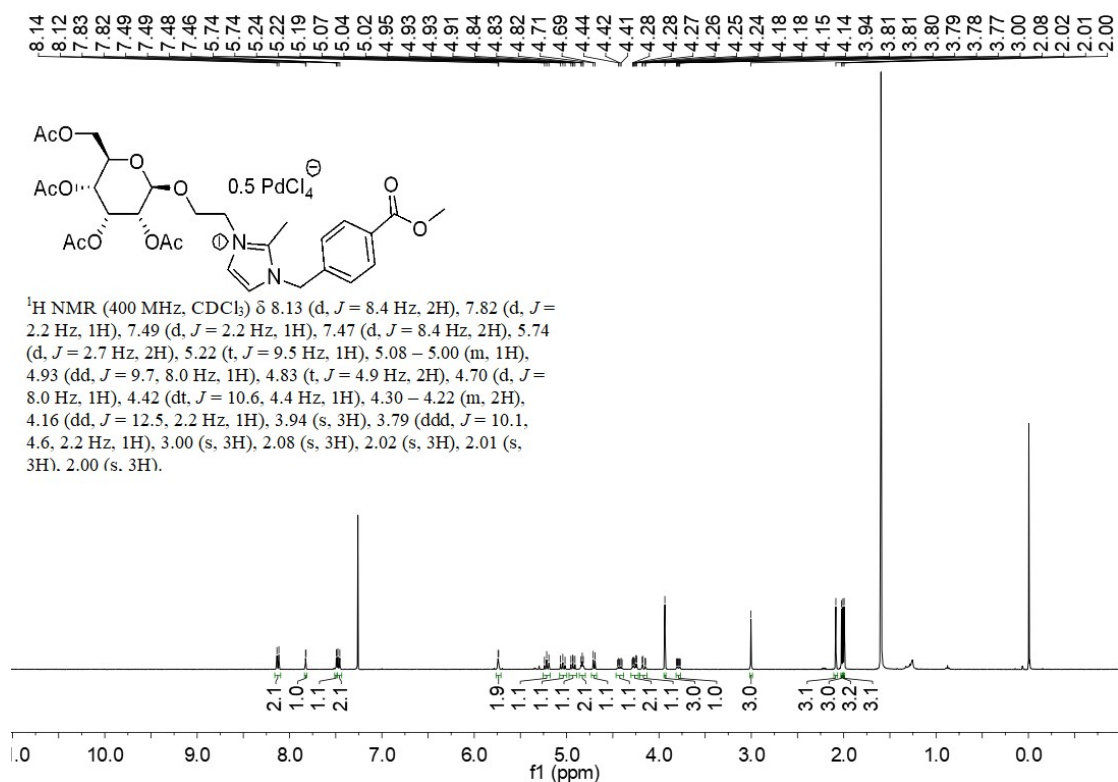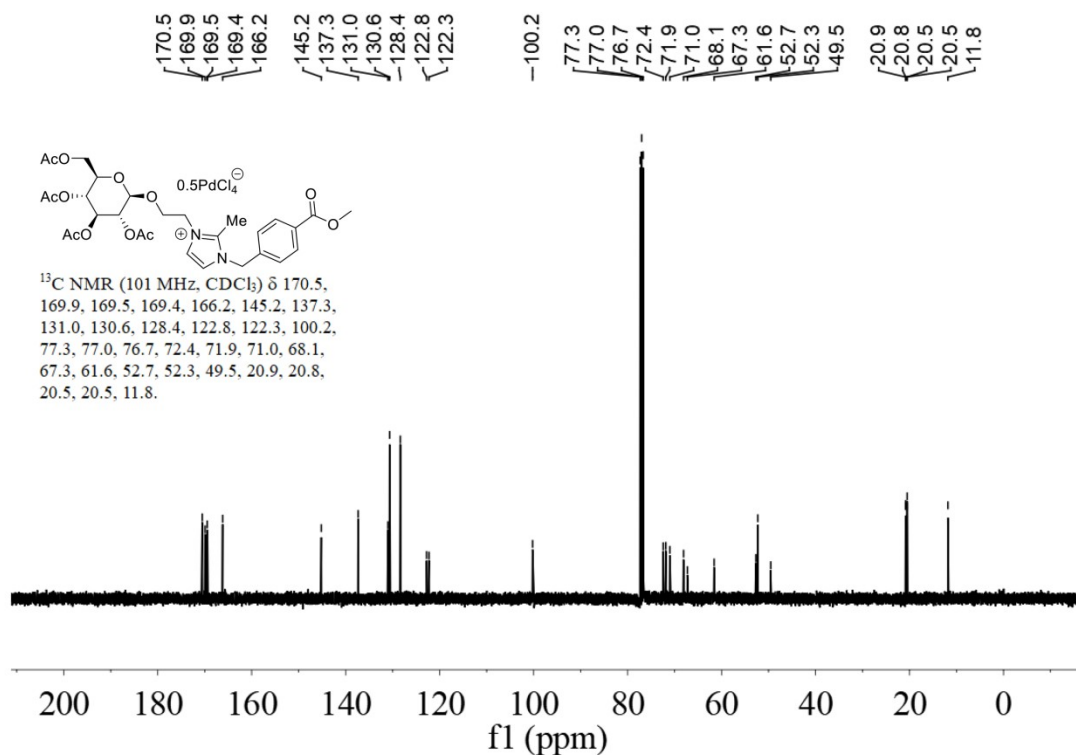

**Figure S10.** <sup>1</sup>H and <sup>13</sup>C NMR spectra of AcGlu-Im-PdCl<sub>4</sub> **10** in CDCl<sub>3</sub>.

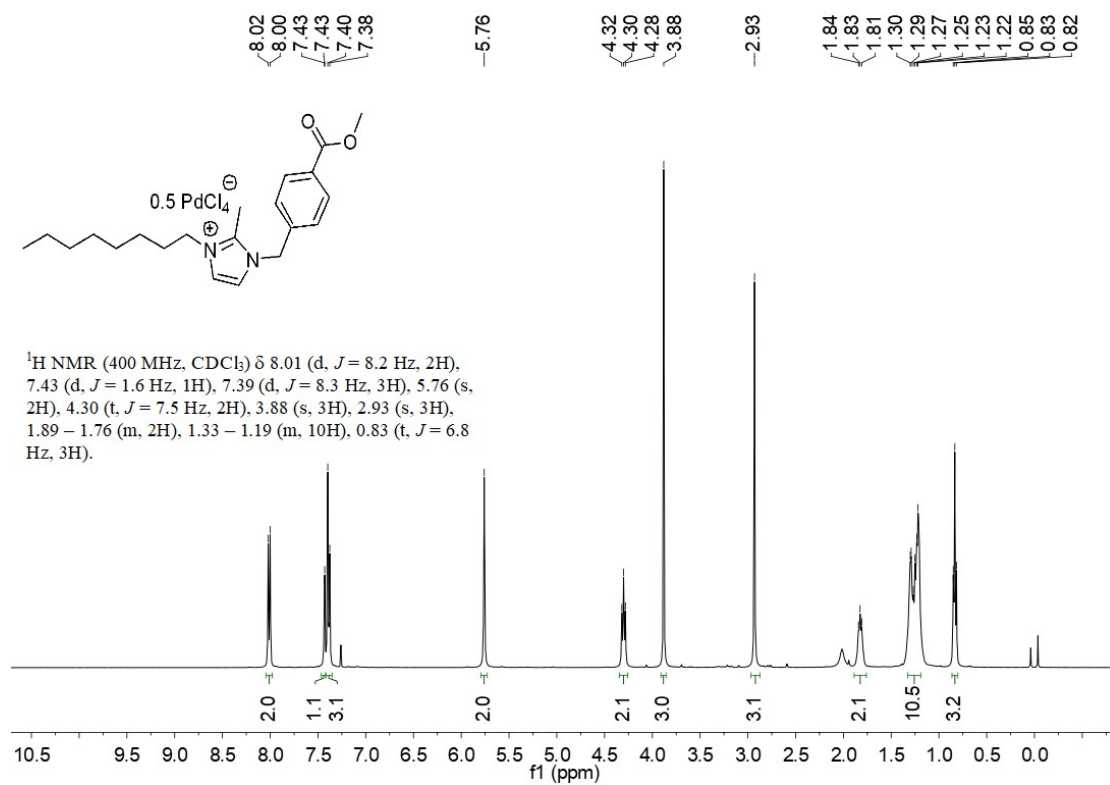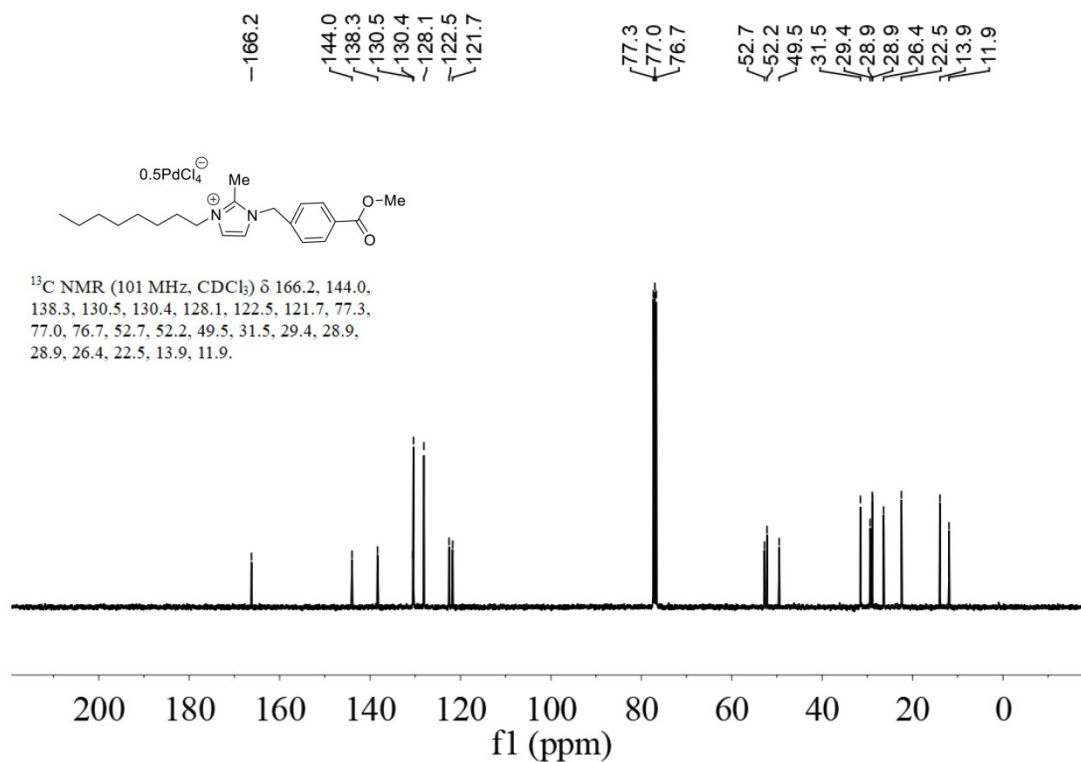

**Figure S11.** <sup>1</sup>H and <sup>13</sup>C NMR spectra of Octyl-Im-PdCl<sub>4</sub> 11 in CDCl<sub>3</sub>.



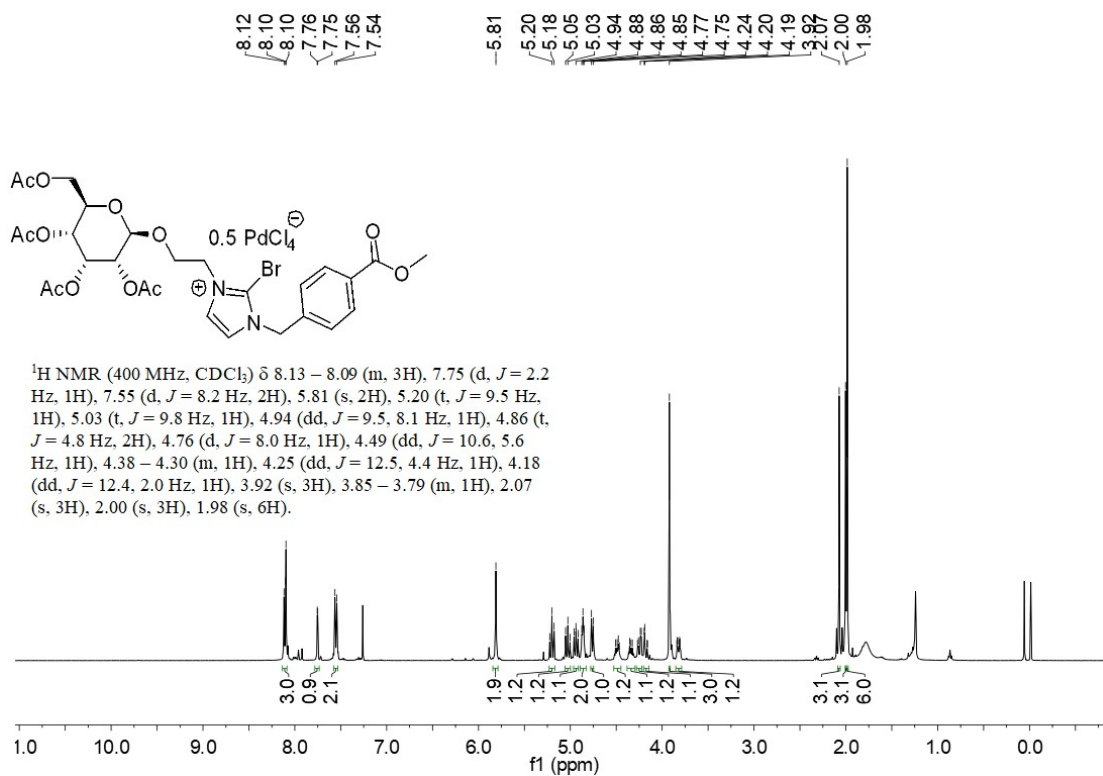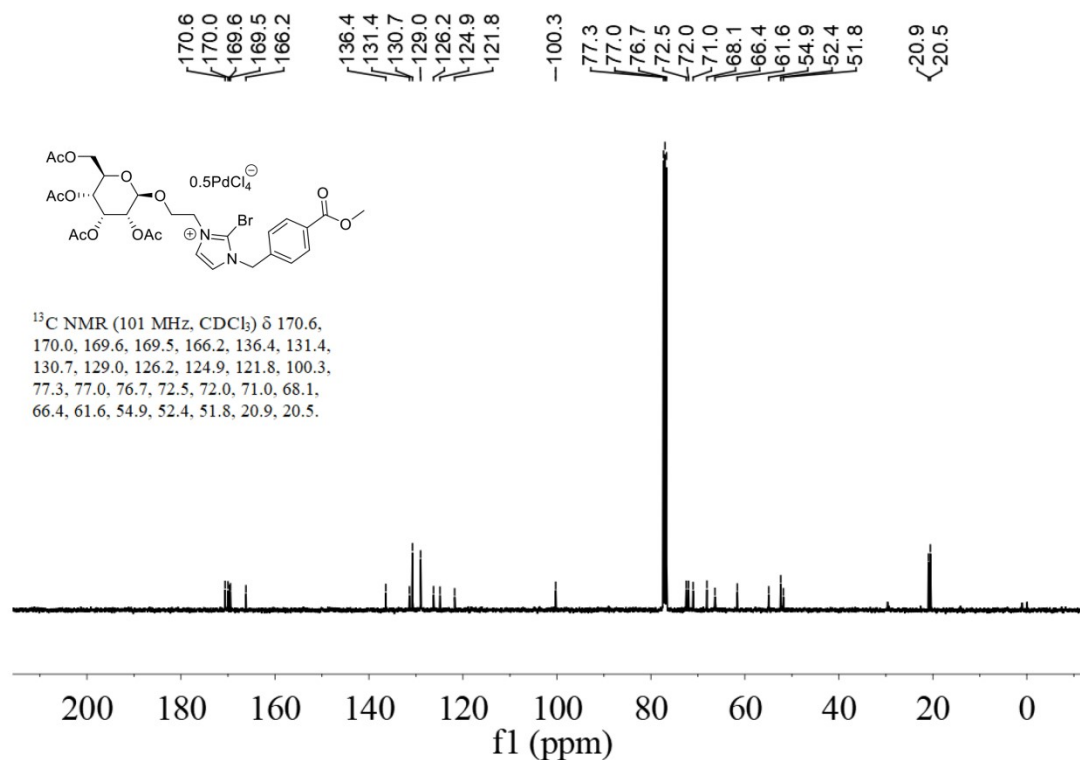

**Figure S12.** <sup>1</sup>H and <sup>13</sup>C NMR spectra of AcGlu-Im-PdCl<sub>4</sub> **12** in CDCl<sub>3</sub>.



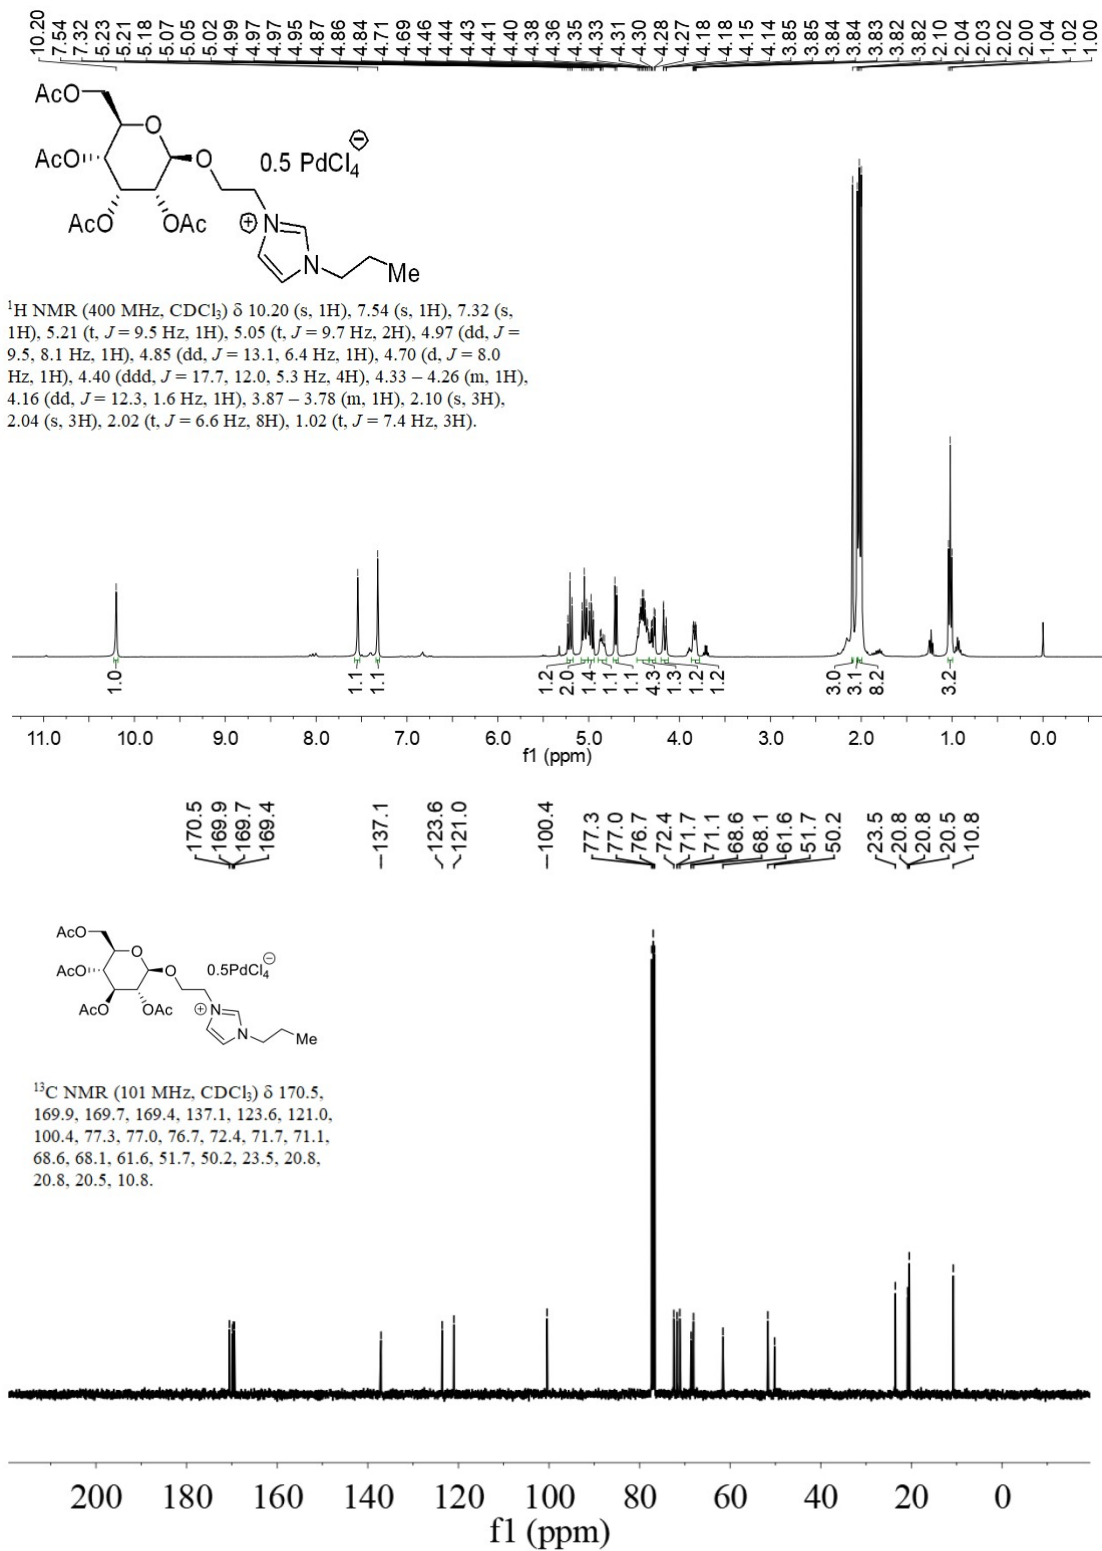

Figure S13. <sup>1</sup>H and <sup>13</sup>C NMR spectra of AcGlu-Im-PdCl<sub>4</sub> 13 in CDCl<sub>3</sub>.

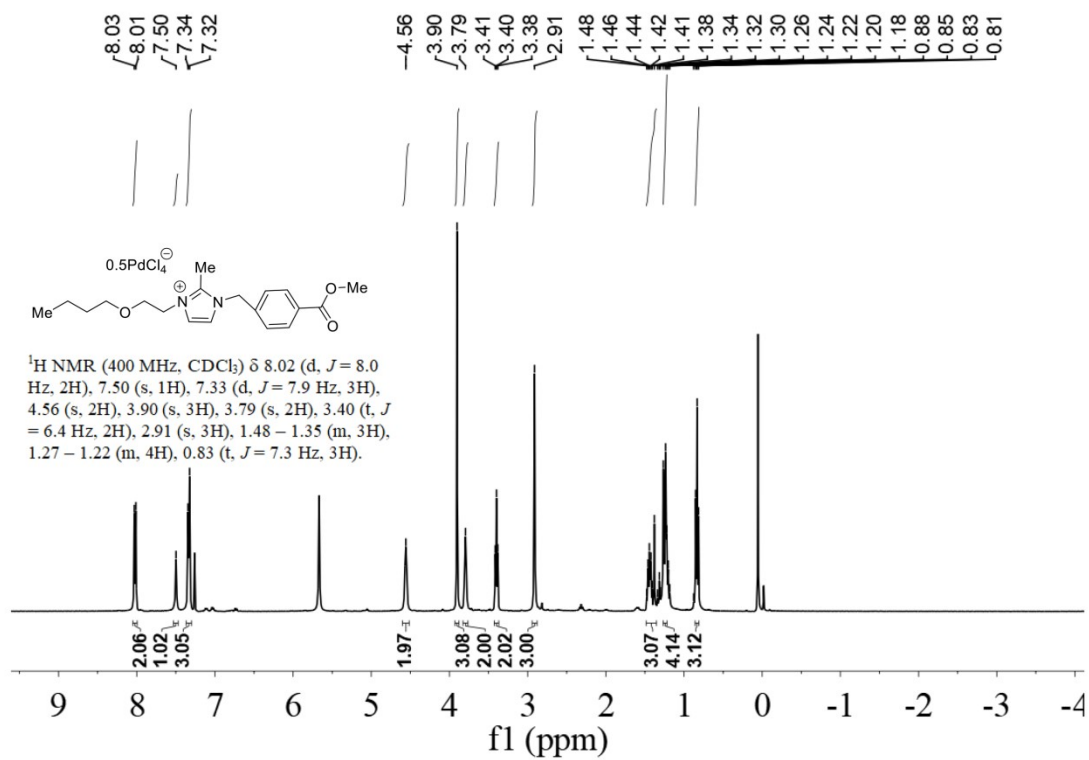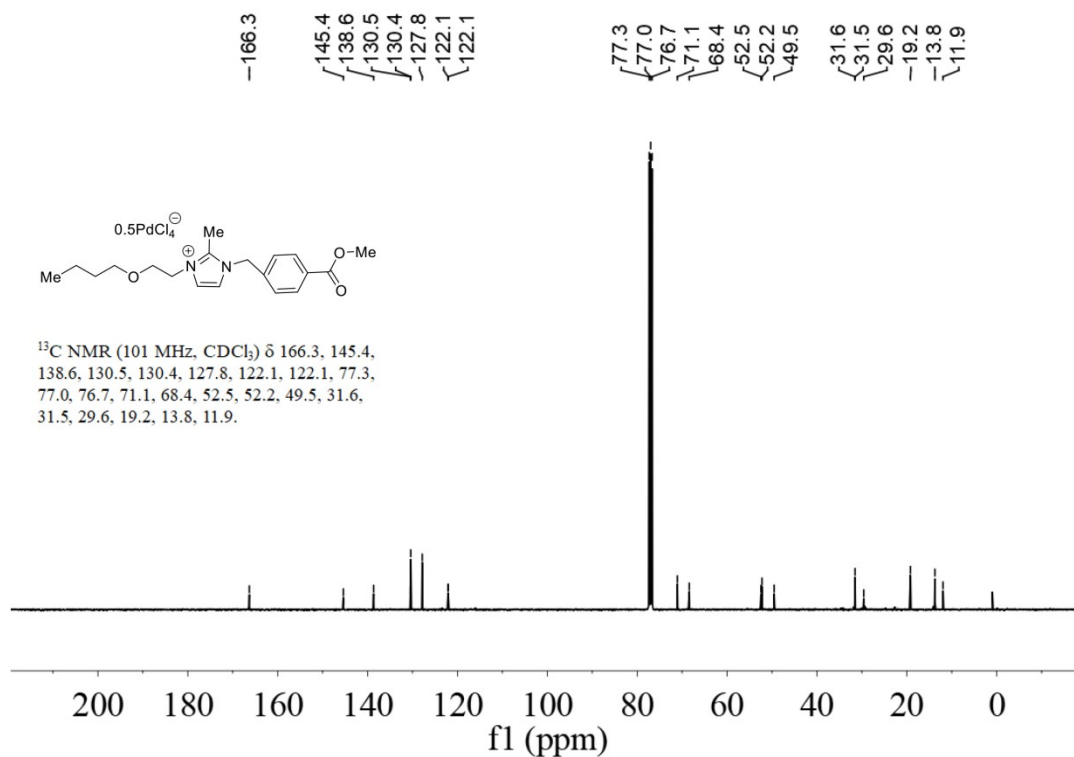

**Figure S14.**  $^1\text{H}$  and  $^{13}\text{C}$  NMR spectra of BOE-Im- $\text{PdCl}_4$  **14** in  $\text{CDCl}_3$ .

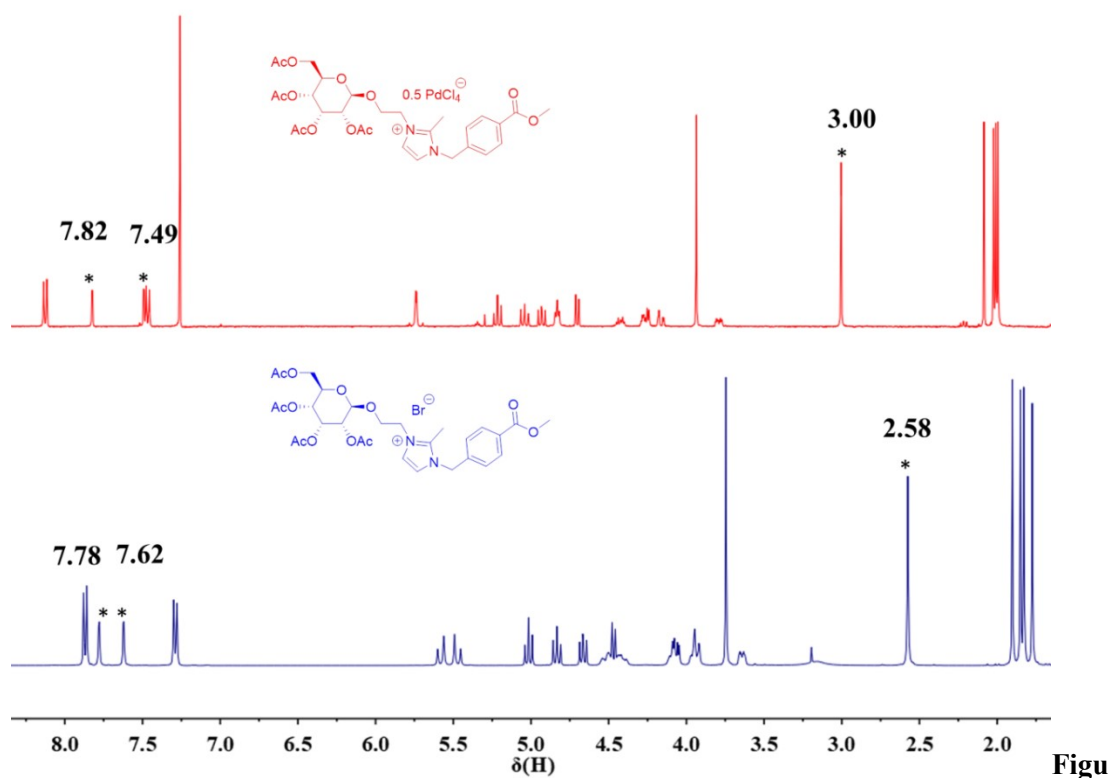

Figure S15.  $^1\text{H}$  NMR spectra of AcGlu-Im-Br **3** and AcGlu-Im-PdCl<sub>4</sub> **10** in CDCl<sub>3</sub>.

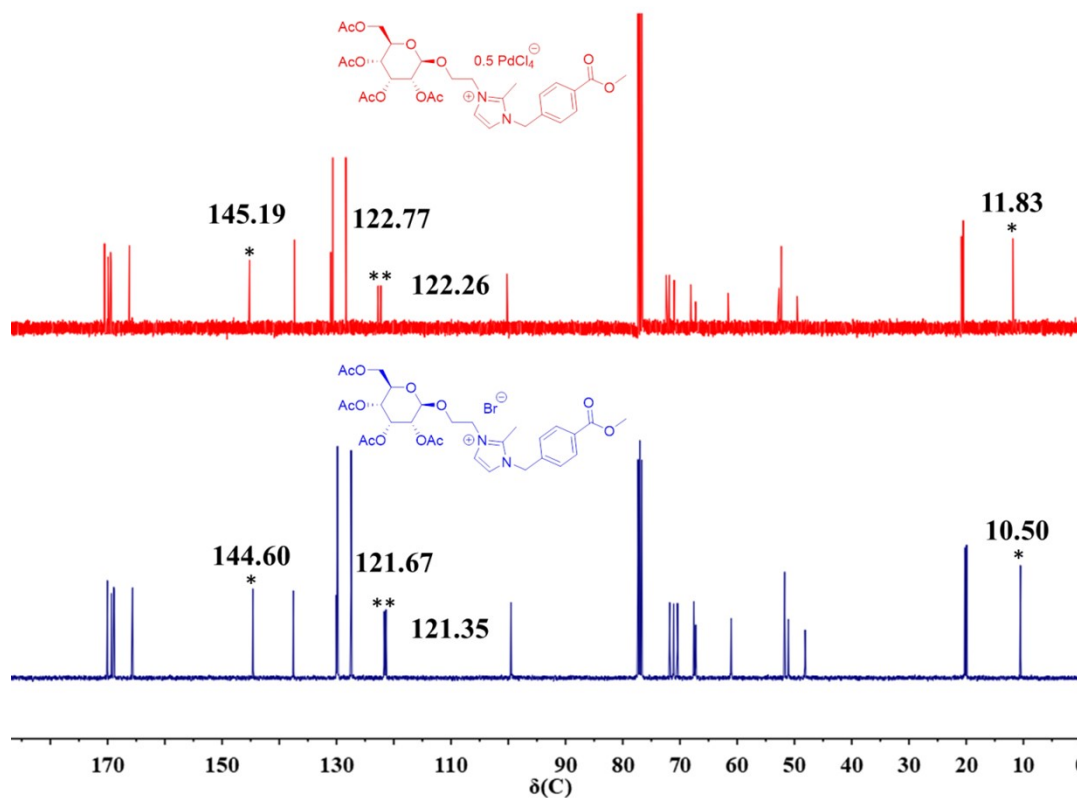

Figure S16.  $^{13}\text{C}$  NMR spectra of AcGlu-Im-Br **3** and AcGlu-Im-PdCl<sub>4</sub> **10** in CDCl<sub>3</sub>.

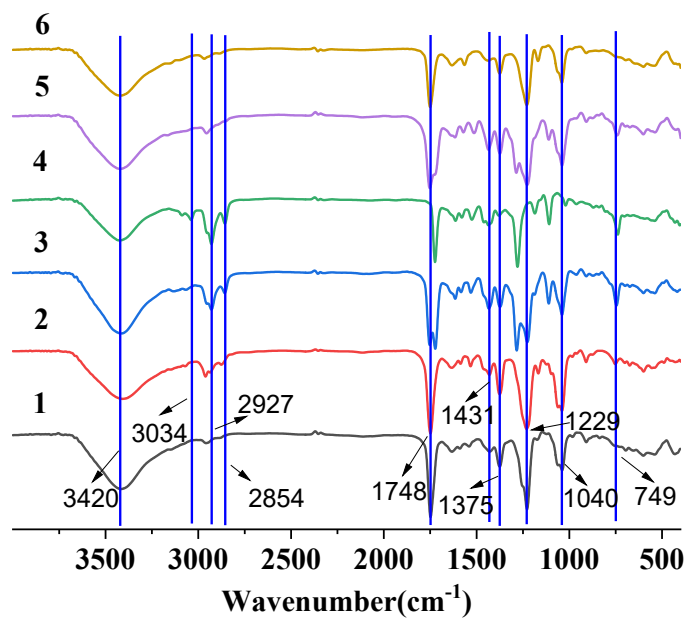

Figure S17. FT-IR spectra of Im-Br 1-6.

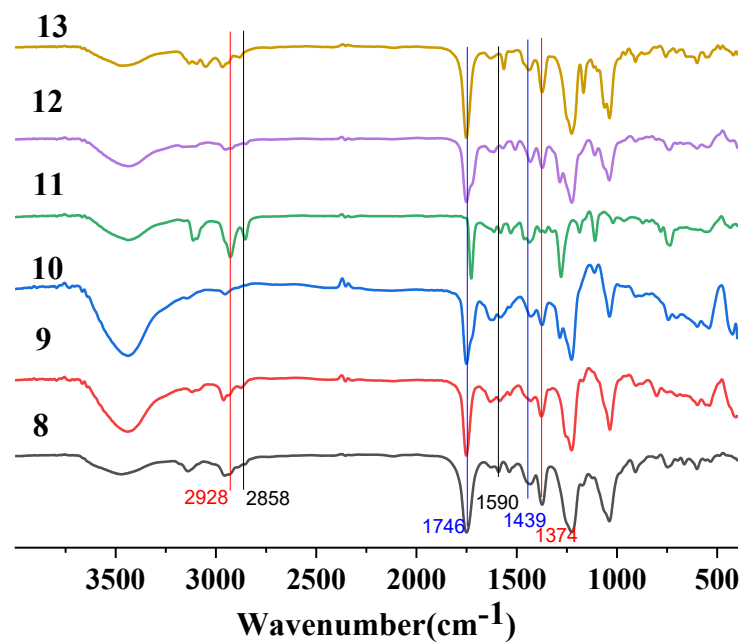

Figure S18. FT-IR spectra of Im- $\text{PdCl}_4$  8-13.

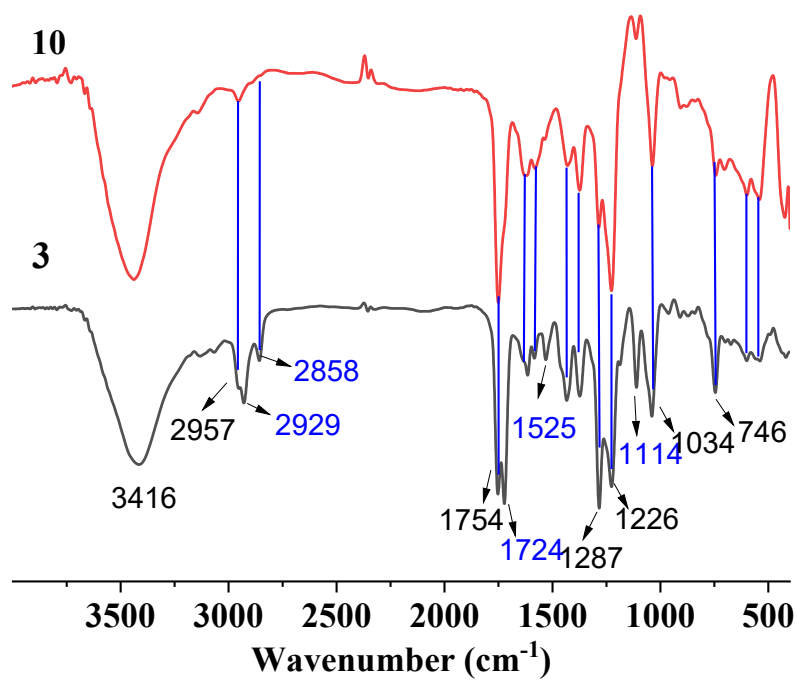

Figure S19. FT-IR spectra of AcGlu-Im-Br **3** and AcGlu-Im-PdCl<sub>4</sub> **10**.

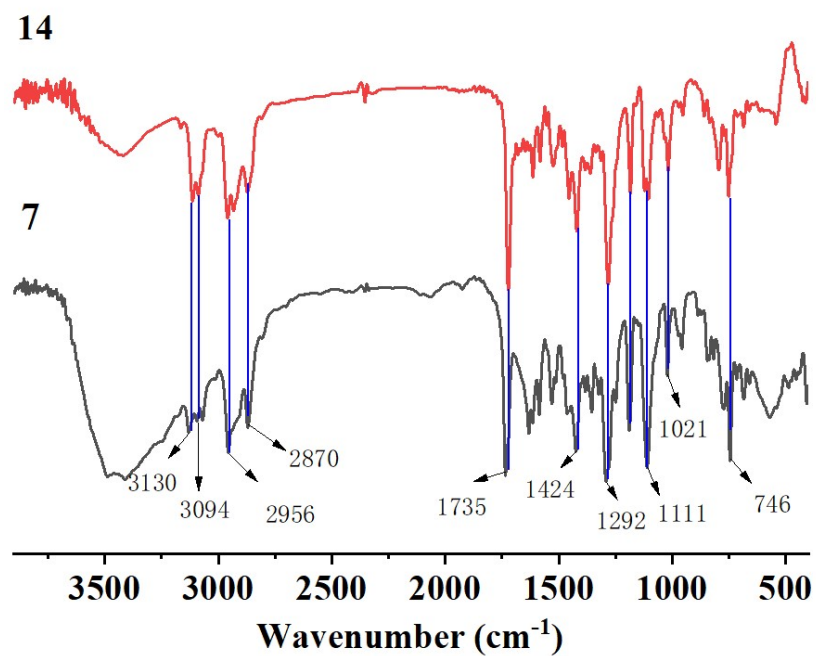

Figure S20. FT-IR spectra of BOE-Im-Br **7** and BOE-Im-PdCl<sub>4</sub> **14**.

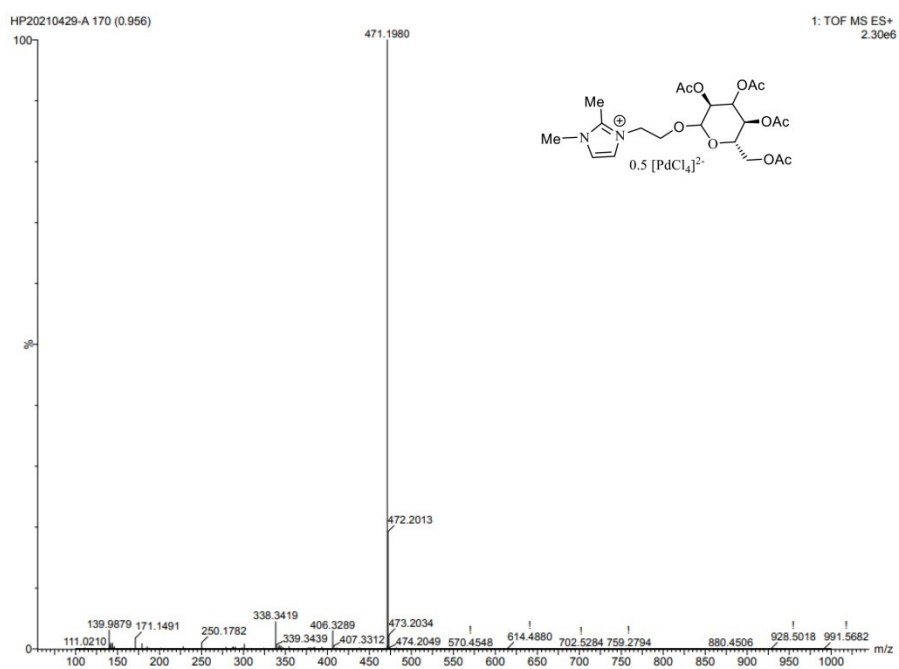

**Figure S21.** HR-MS spectra of AcGlu-Im-PdCl<sub>4</sub> **8**.

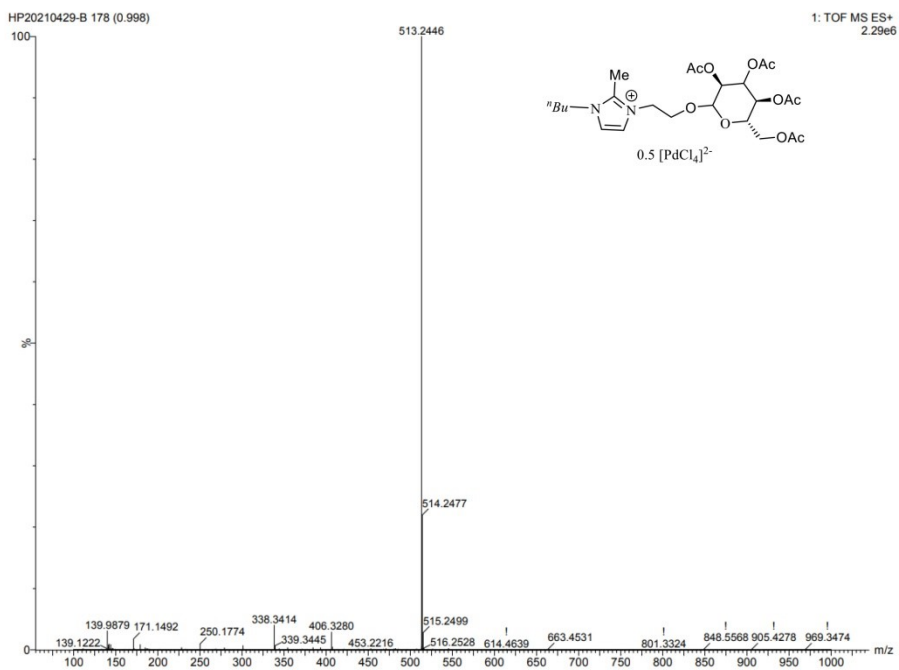

**Figure S22.** HR-MS spectra of AcGlu-Im-PdCl<sub>4</sub> **9**.

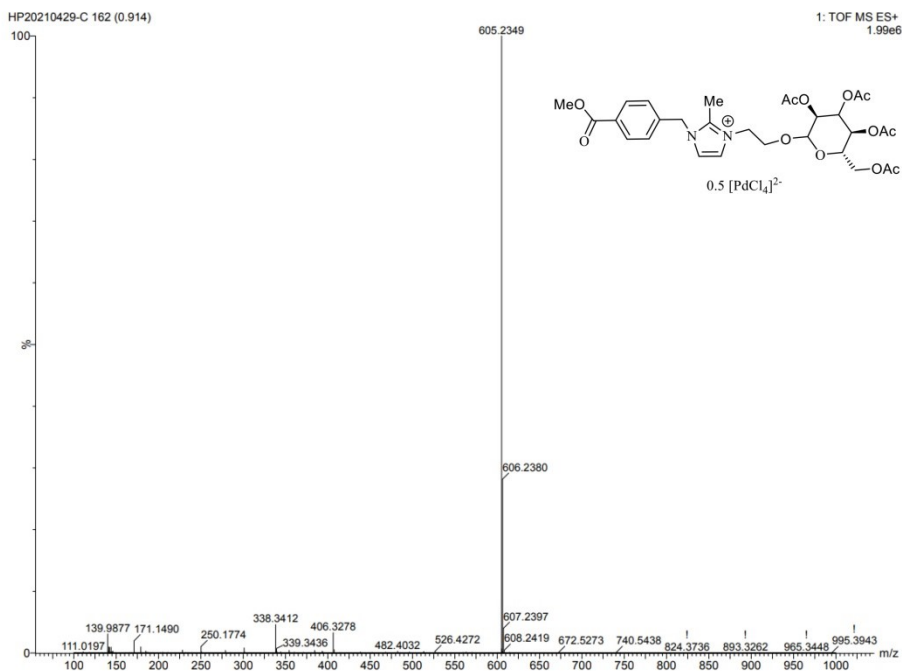

**Figure S23.** HR-MS spectra of AcGlu-Im-PdCl<sub>4</sub> **10**.

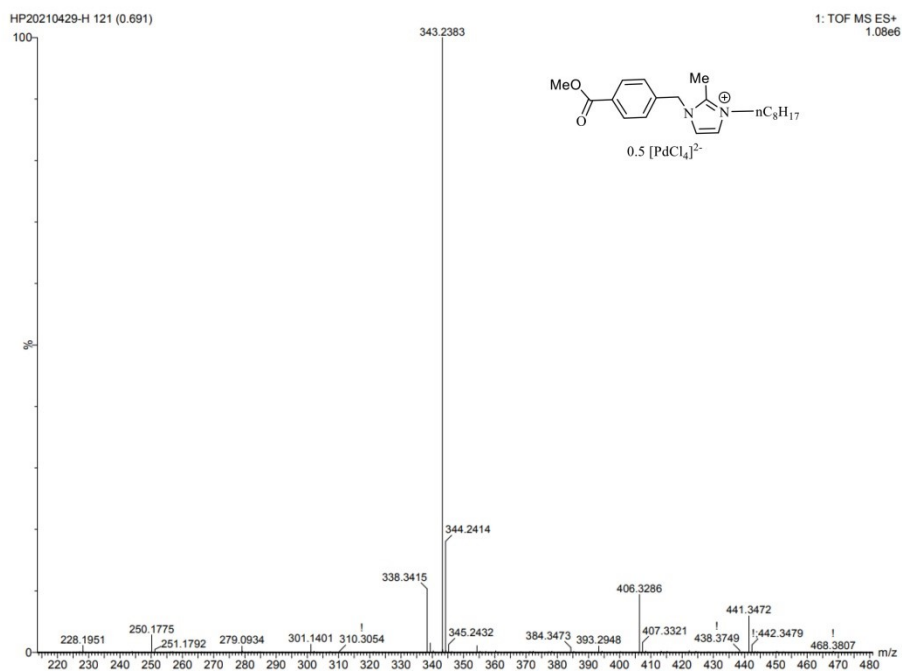

**Figure S24.** HR-MS spectra of Octyl-Im-PdCl<sub>4</sub> **11**.

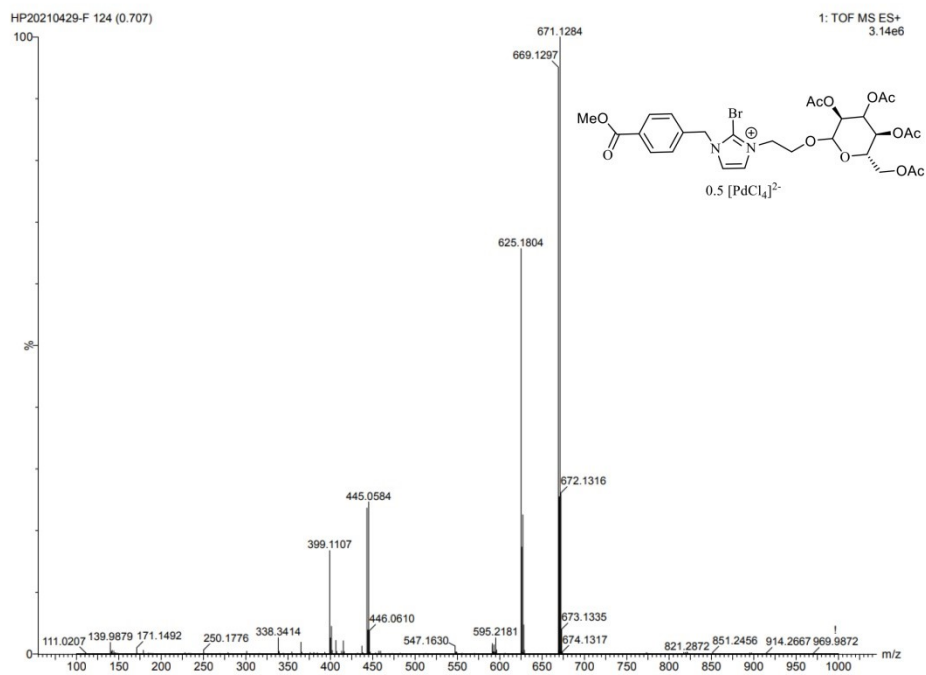

**Figure S25.** HR-MS spectra of Octyl-Im-PdCl<sub>4</sub> **12**.

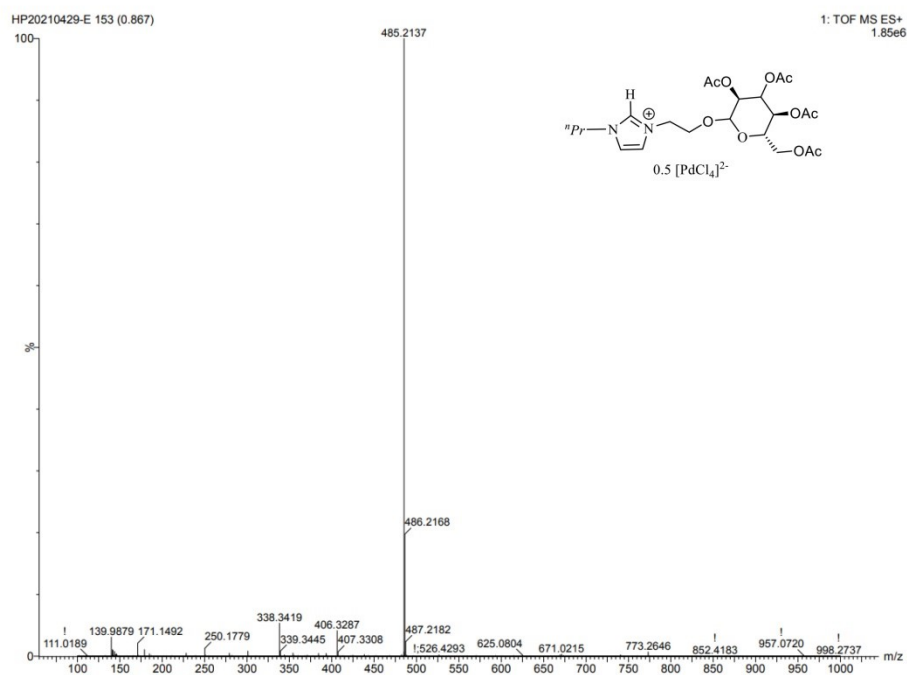

**Figure S26.** HR-MS spectra of AcGlu-Im-PdCl<sub>4</sub> **13**.



| Formula Predictor Result |                     | C19 H27 N2 O3 |  |
|--------------------------|---------------------|---------------|--|
| Mass                     | 332.20789           |               |  |
| Error Margin             | 1.0 ppm             |               |  |
| DBE Range                | Not Used            |               |  |
| Electron Ions            | Both configurations |               |  |
| HC Ratio                 | Not Used            |               |  |
| Nitrogen Rule            | Not Used            |               |  |

| # | Score | Pred. (M) | Pred. m/z | Meas. m/z | Diff. (mDa) | Formulae (M)  | Ion                | Diff. (ppm) | Iso Score | DBE |
|---|-------|-----------|-----------|-----------|-------------|---------------|--------------------|-------------|-----------|-----|
| 4 | 53.46 | 331.20217 | 332.20944 | 332.20789 | -1.55       | C19 H27 N2 O3 | [M+H] <sup>+</sup> | -4.666      | 54.48     | 7.5 |

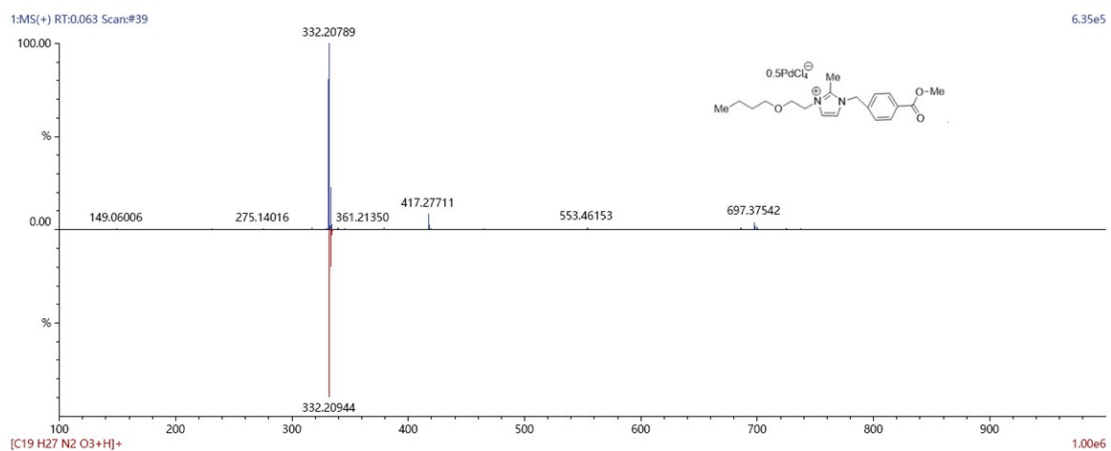

**Figure S27.** HR-MS spectra of BOE-Im-PdCl<sub>4</sub> 14.

## 2.6 NMR Spectra of Mechanisms

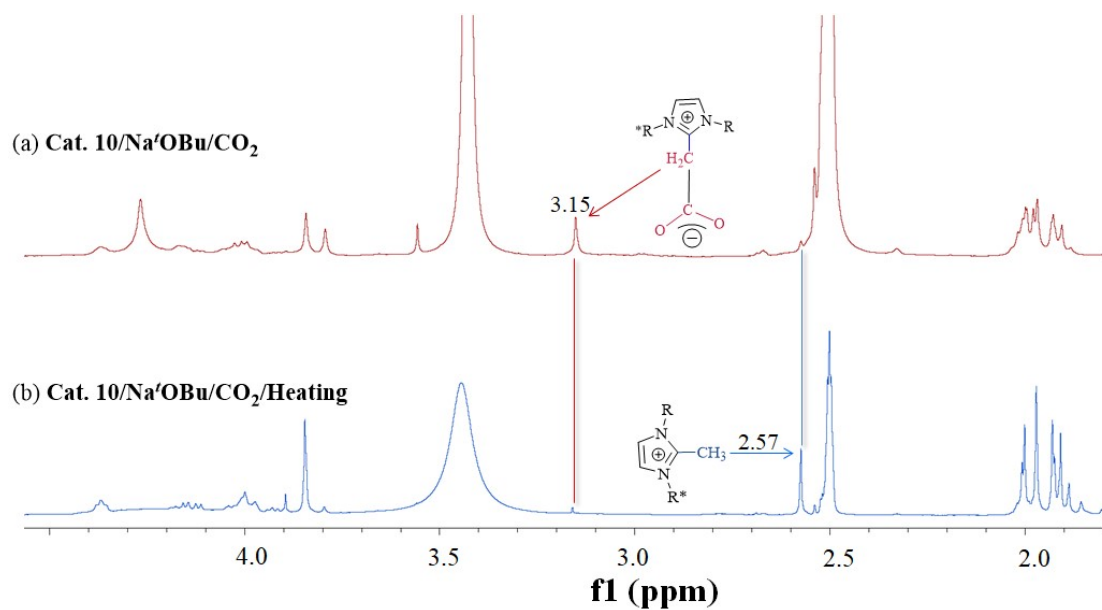

**Figure S28.** <sup>1</sup>H NMR spectrum of (a) Cat. **10**/Na'OBu/CO<sub>2</sub> in DMSO-*d*<sub>6</sub> and (b) Cat. **10**/Na'OBu/CO<sub>2</sub>/Heating at 70 °C for 20 min in DMSO-*d*<sub>6</sub>.

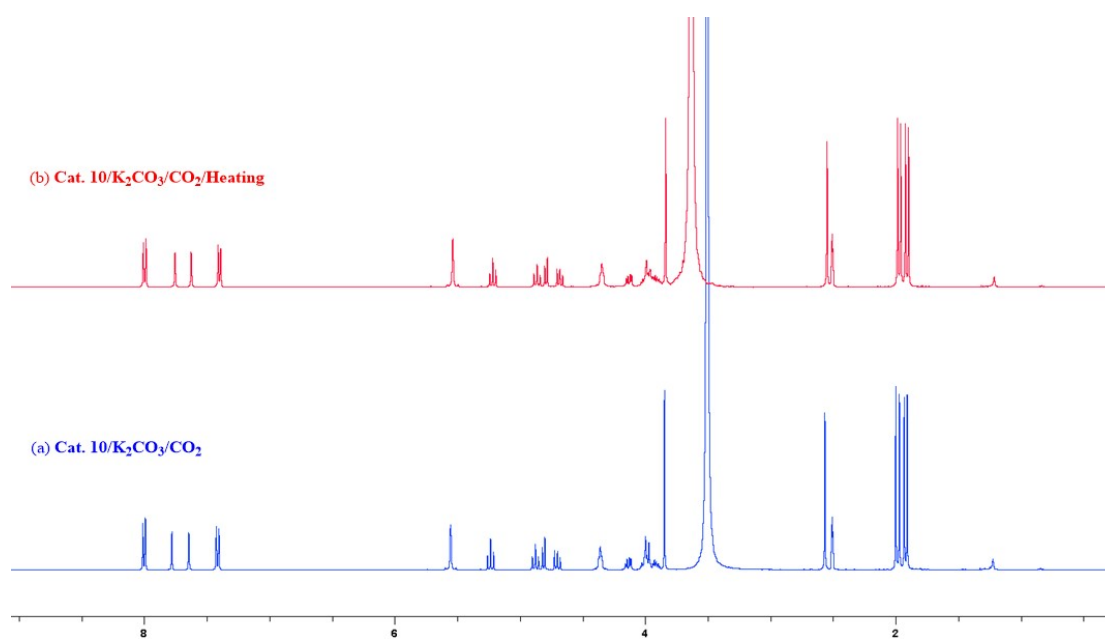

**Figure S29.** <sup>1</sup>H NMR spectra of (a) Cat. **10**/K<sub>2</sub>CO<sub>3</sub>/CO<sub>2</sub> at R.T. and (b) Cat. **10**/K<sub>2</sub>CO<sub>3</sub>/CO<sub>2</sub>/Heating at 35 °C for 1.0 h in DMSO-*d*<sub>6</sub>.

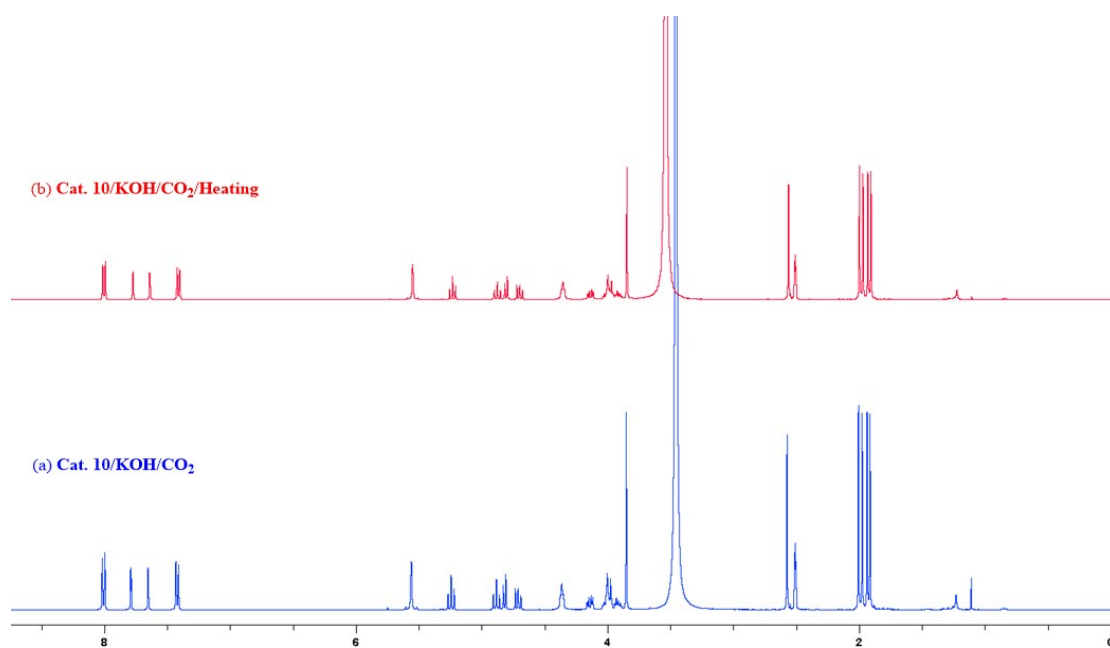

**Figure S30.** <sup>1</sup>H NMR spectra of (a) Cat. **10**/KOH/CO<sub>2</sub> at R.T. and (b) Cat. **10**/KOH/CO<sub>2</sub>/Heating at 35 °C for 1.0 h in DMSO-*d*<sub>6</sub>.

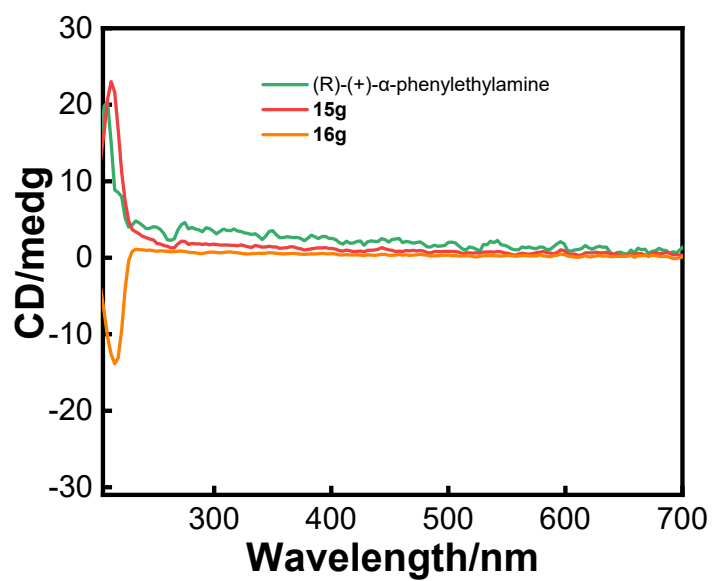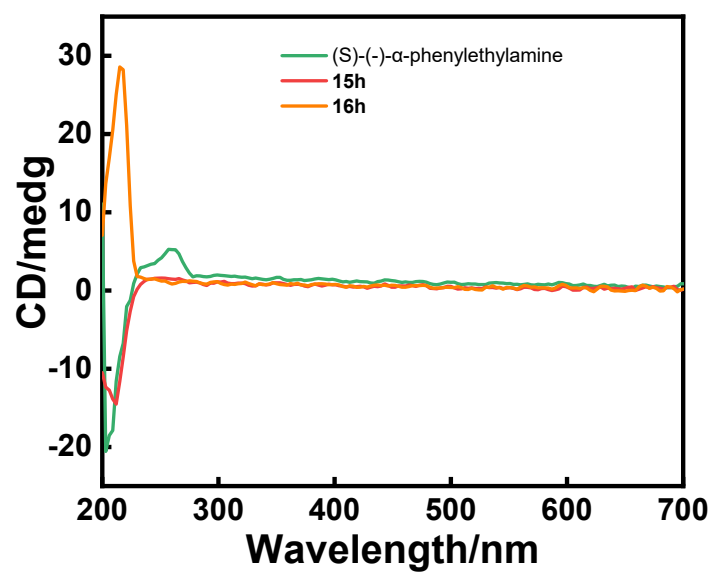

Figure S31. The circular dichroism spectrum of (R)-(+)- $\alpha$ -phenylethylamine, (S)-(-)- $\alpha$ -phenylethylamine, 15g, 15h, 16g, and 16h.

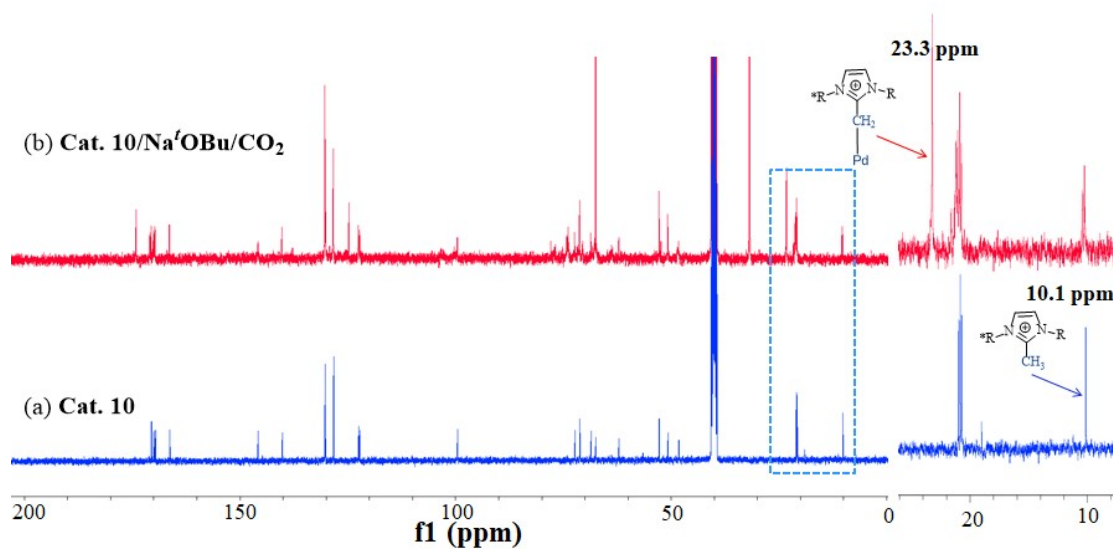

Figure S32. <sup>13</sup>C NMR spectrum of (a) Cat. 10 and (b) Cat. 10/Na<sup>+</sup>OBu/CO<sub>2</sub>.

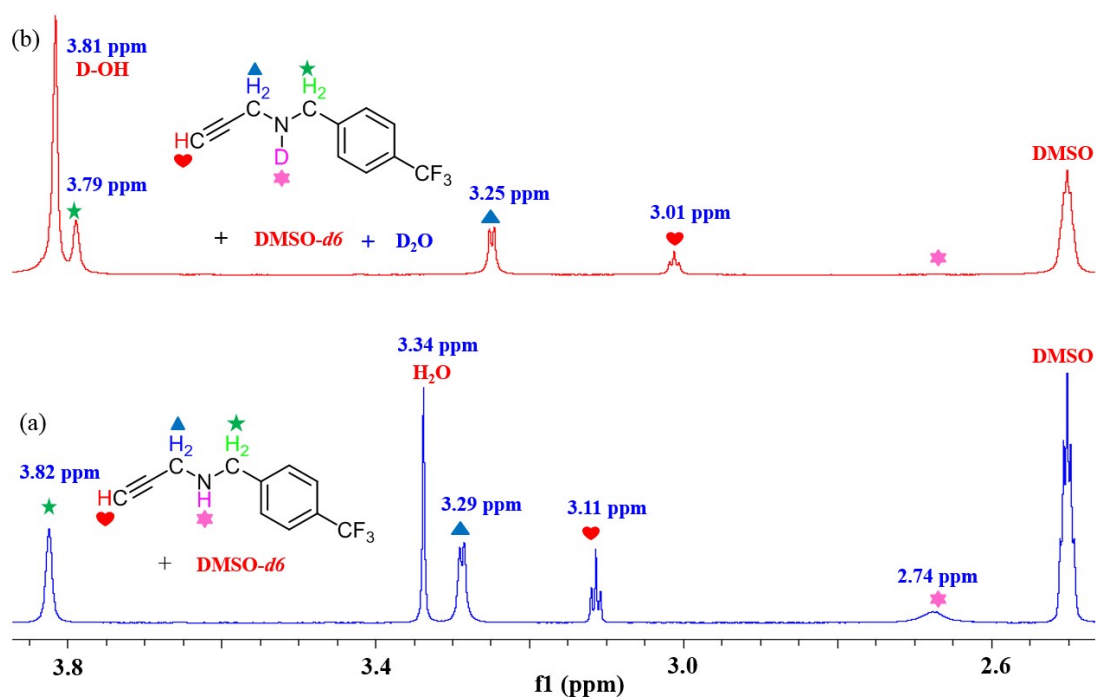

Figure S33. <sup>1</sup>H NMR spectra of (a) **15a** and (b) D<sub>2</sub>O exchange experiment of **15a**/D<sub>2</sub>O (two drops) in DMSO-*d*<sub>6</sub>.

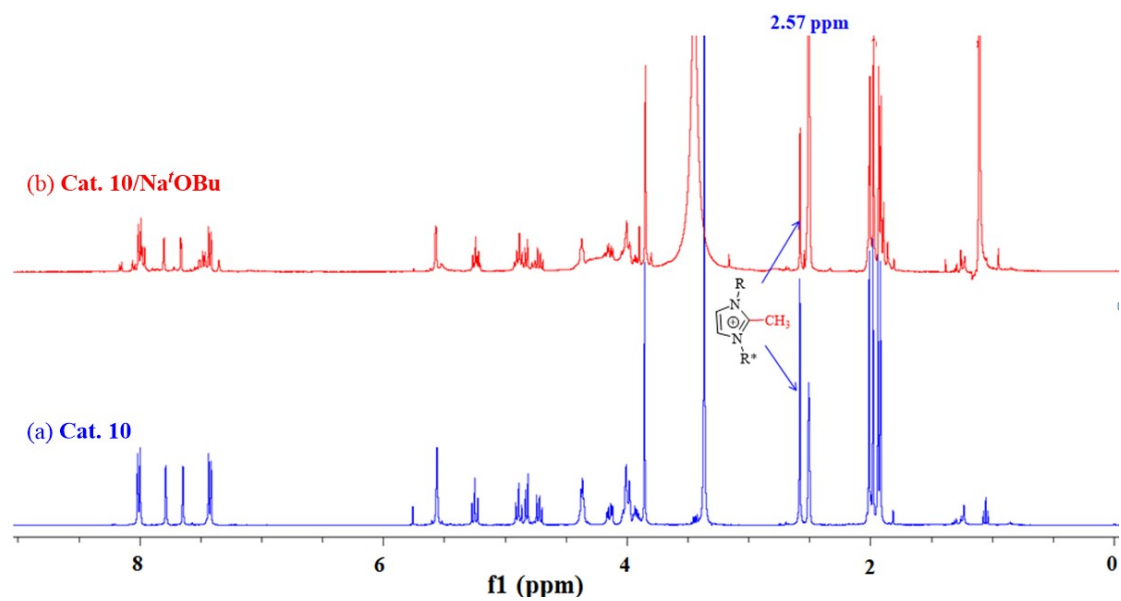

**Figure S34.** <sup>1</sup>H NMR spectra of (a) Cat. 10 and (b) Cat. 10/Na'OBu in DMSO-*d*<sub>6</sub>.

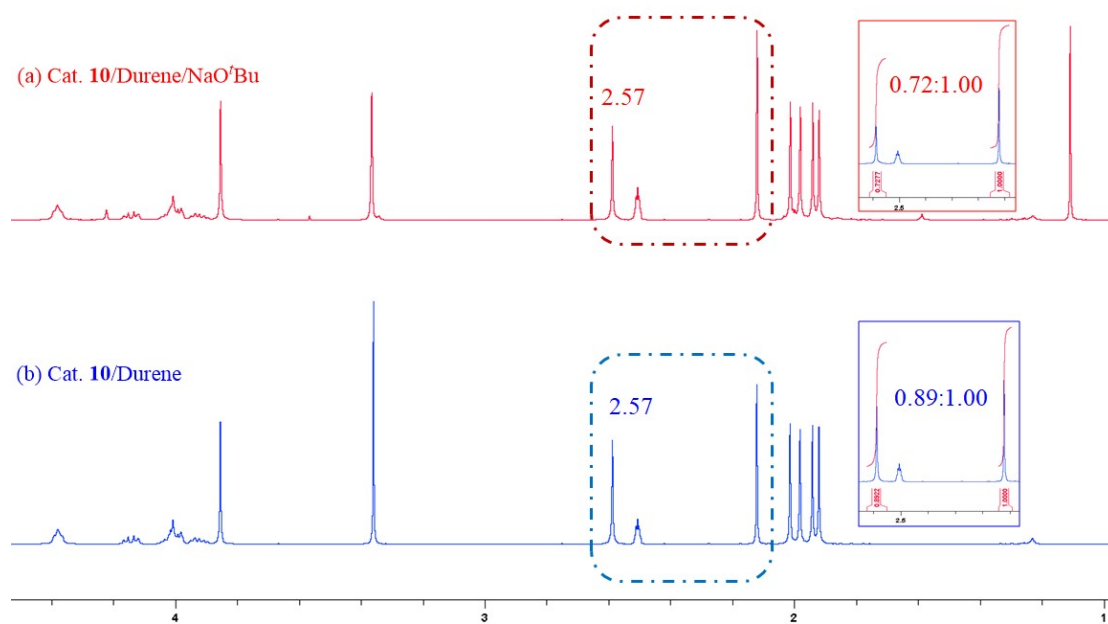

**Figure S35.** (a) <sup>1</sup>H NMR spectra of Cat. 10 with internal standard durene. (b) <sup>1</sup>H NMR spectra of Cat. 10/NaO'Bu with internal standard durene.

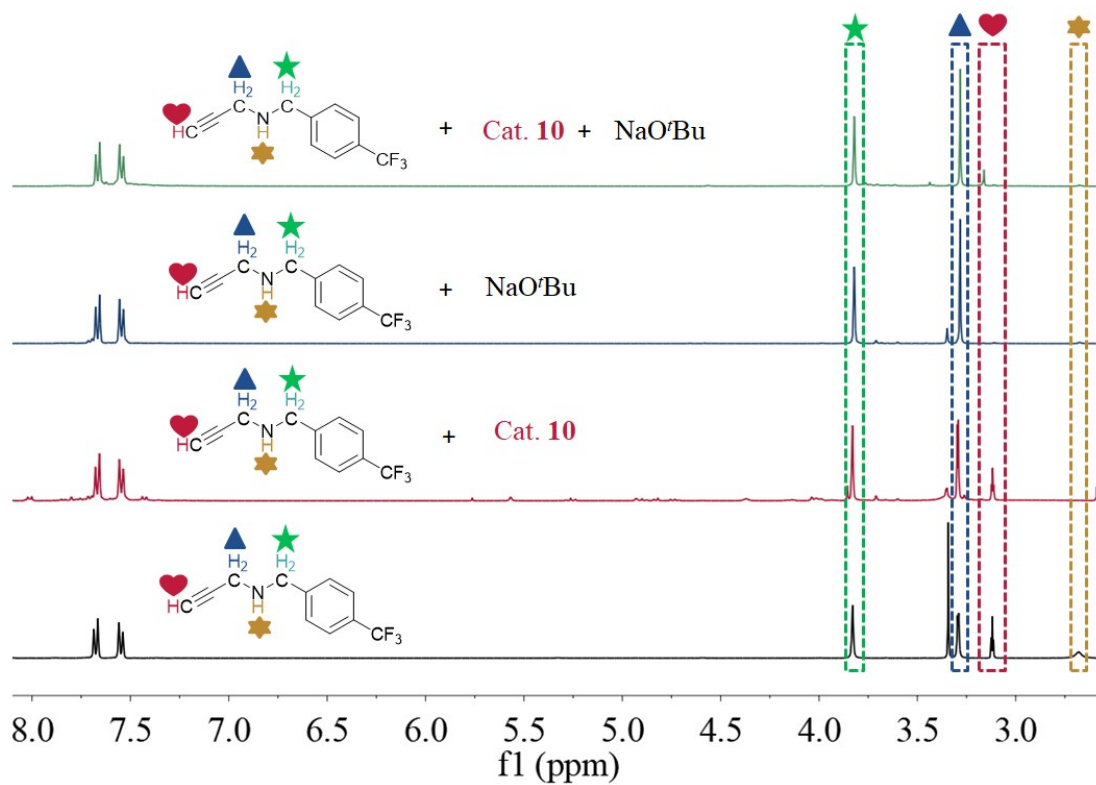

Figure S36. Activation of propargylamine **15a** by different systems in  $\text{DMSO-}d_6$ .

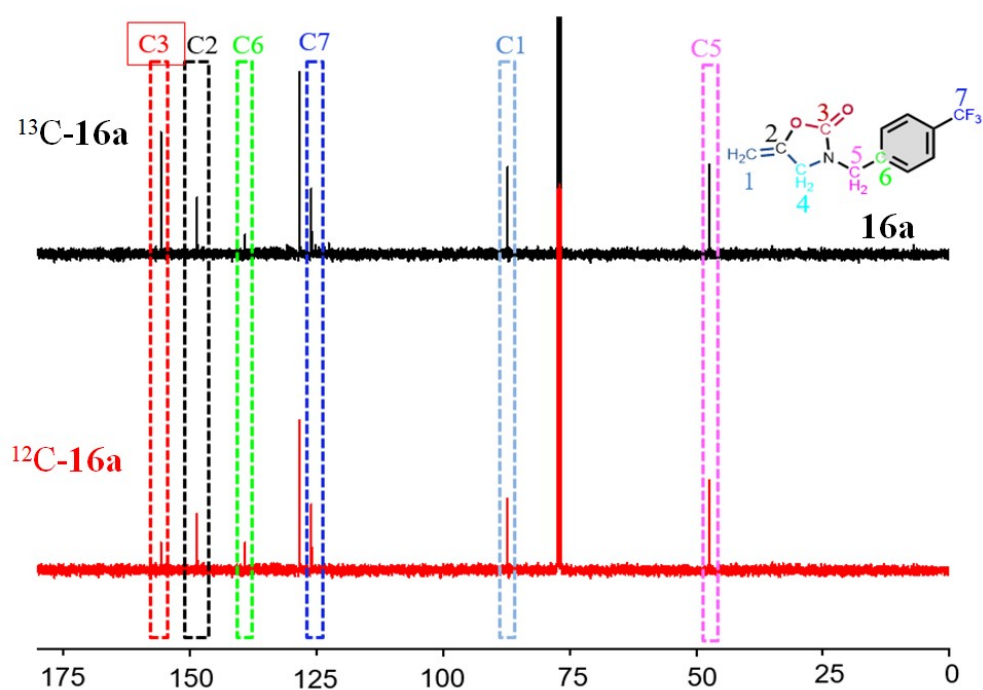

Figure S37. The  $^{13}\text{C}$  NMR comparison spectra of  $^{13}\text{C}$ -isotope-labeling experiments for **16a**.

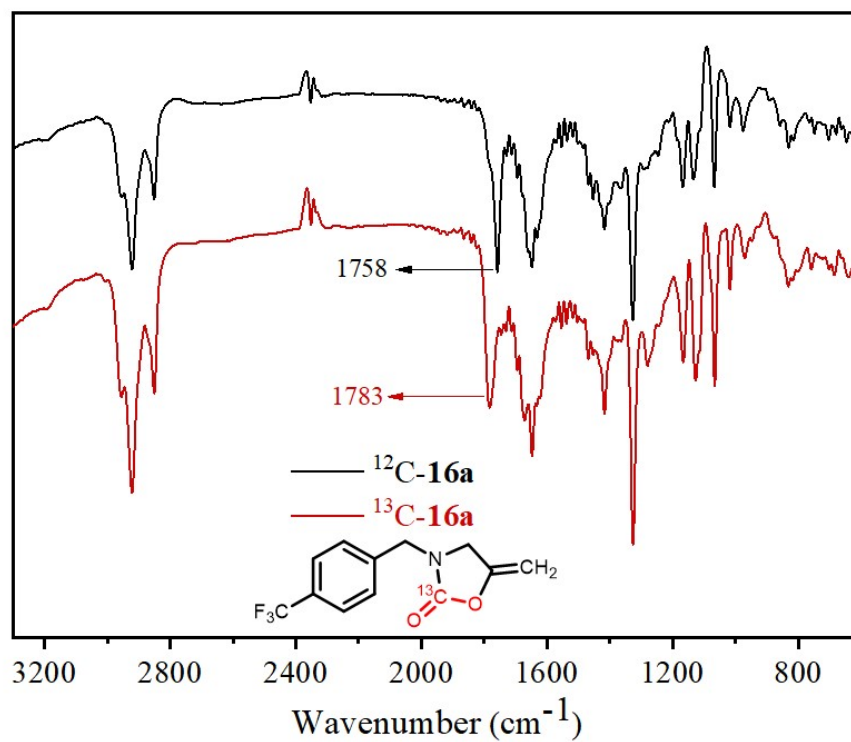

**Figure S38.** The FT-IR spectra of  $^{13}\text{C}$ -isotope-labeling experiments for **16a**.



## 2.7 NMR Spectra of Propargyl Amines and 2-Oxazolidinones

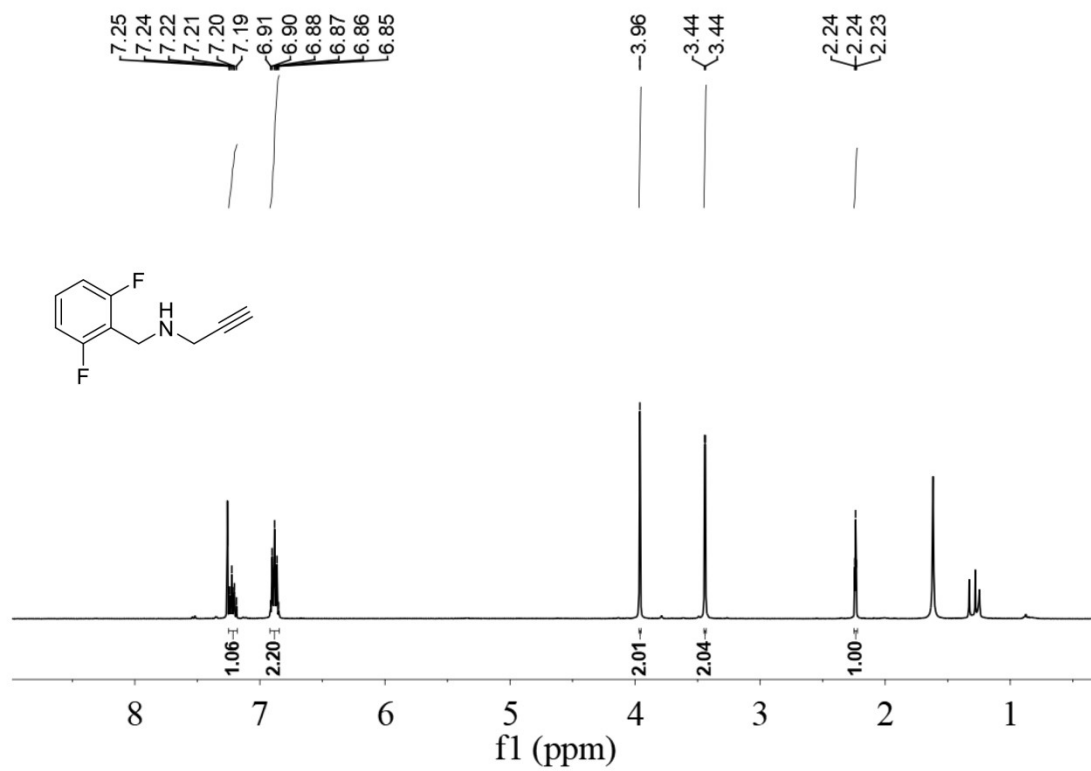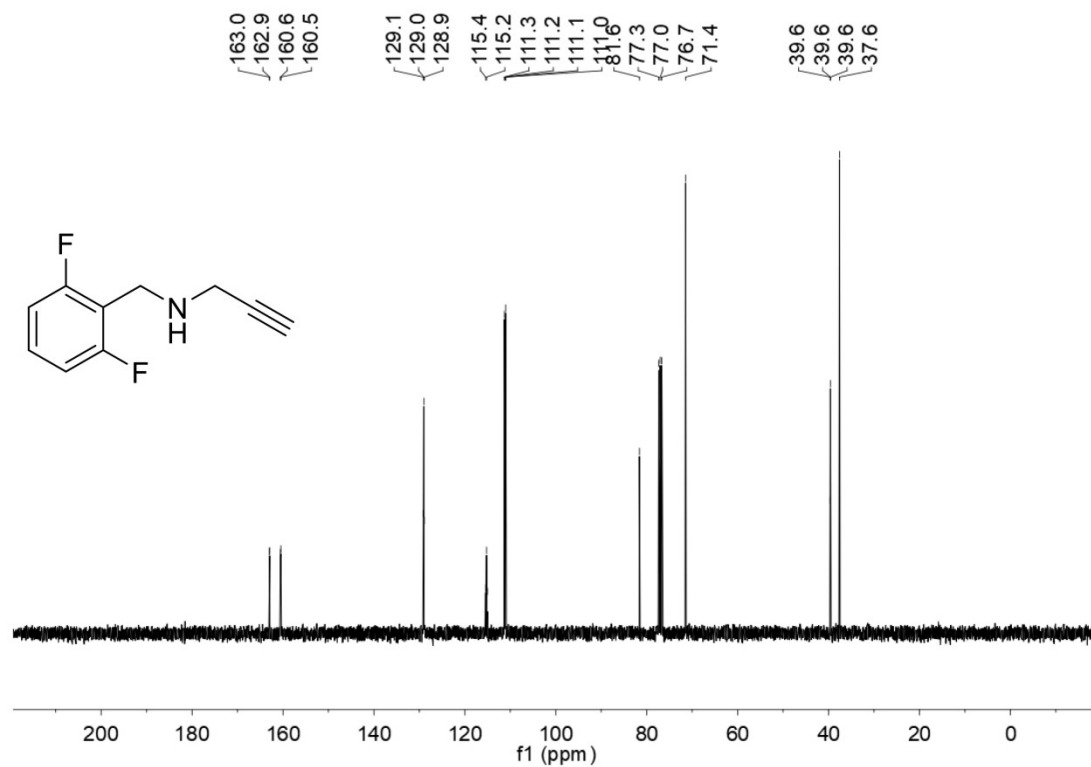

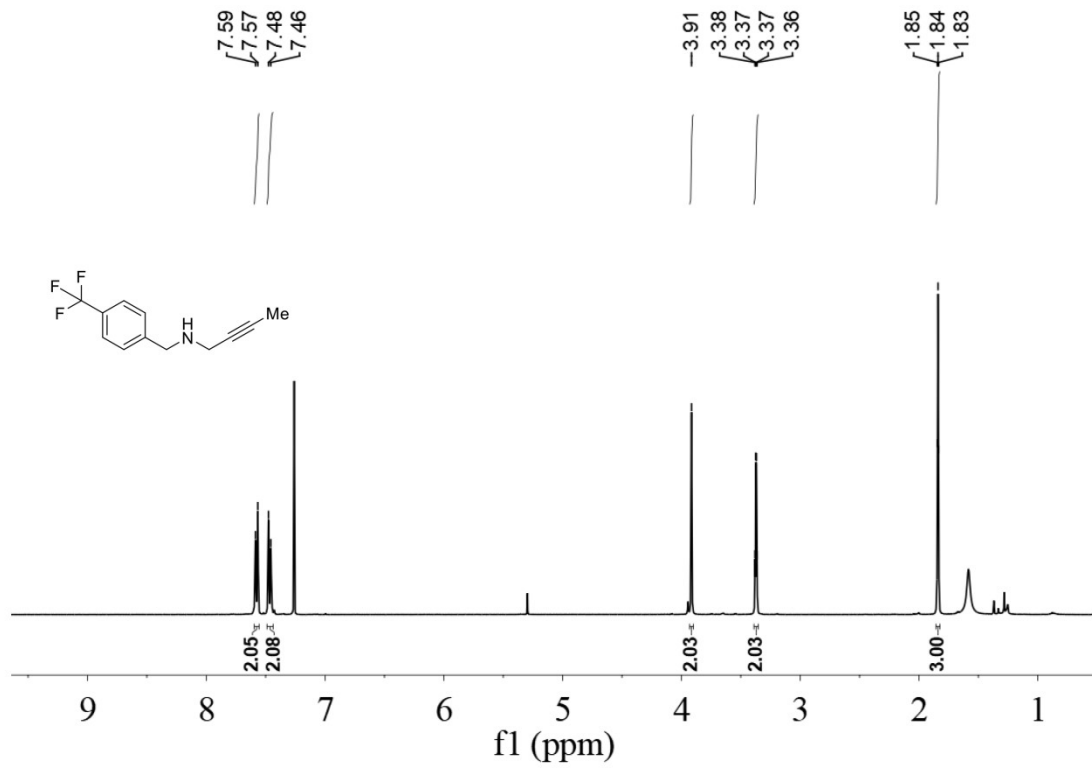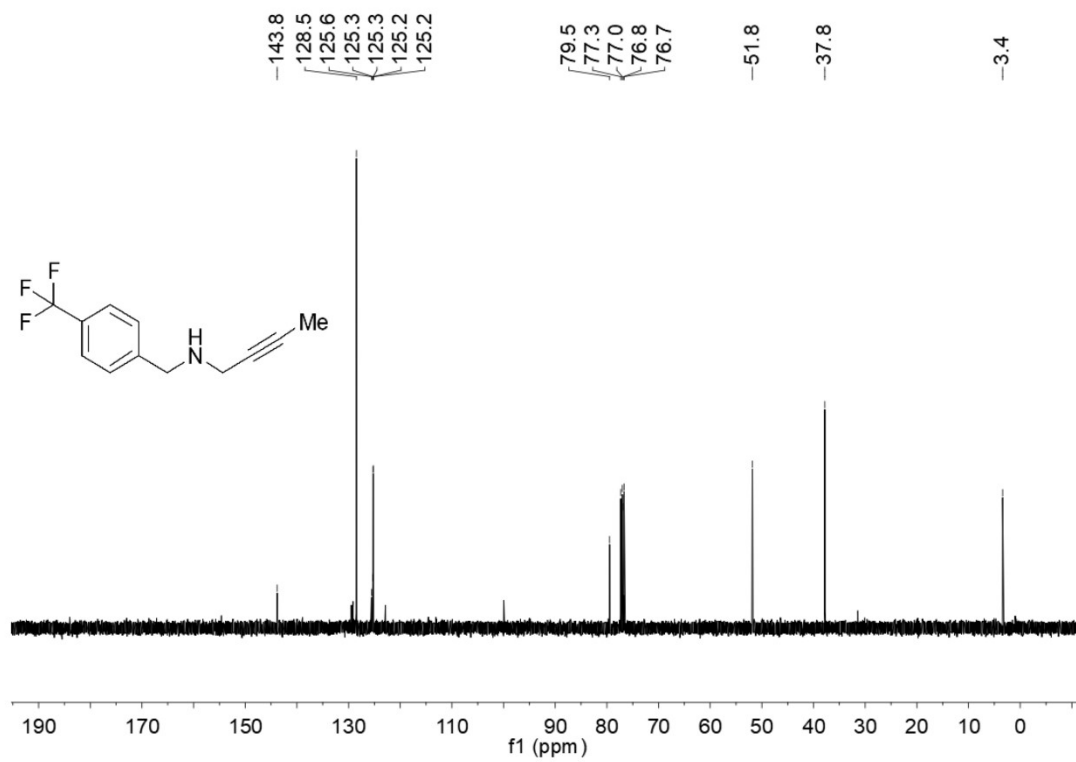

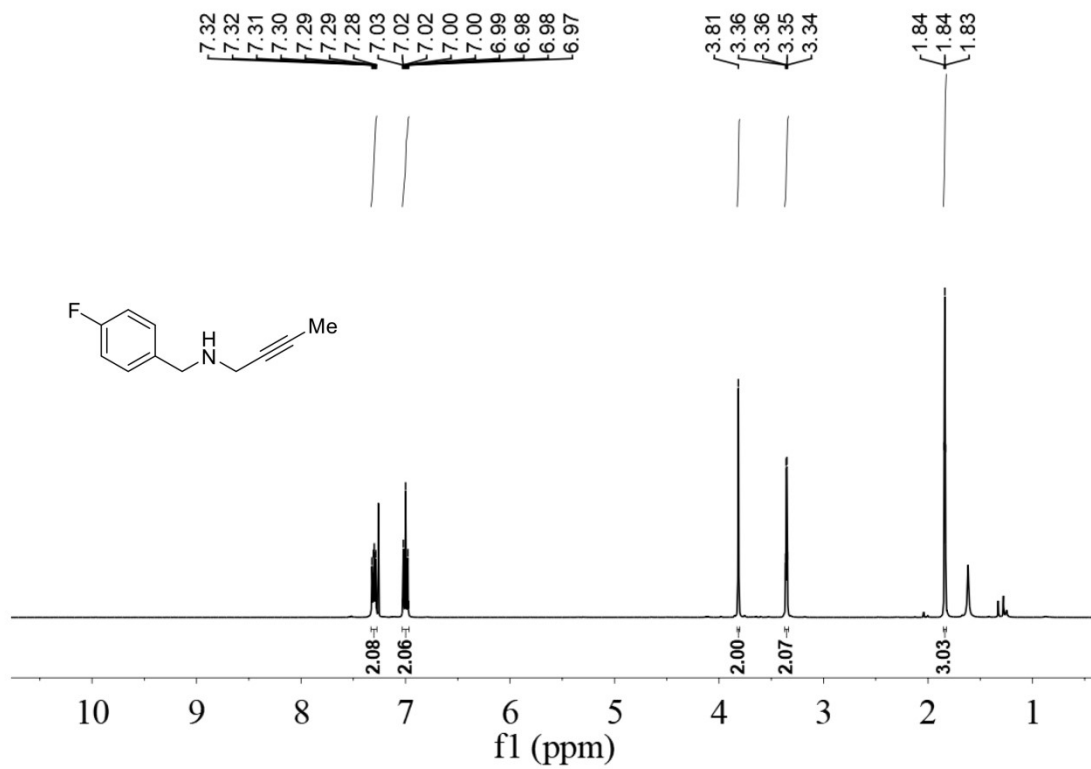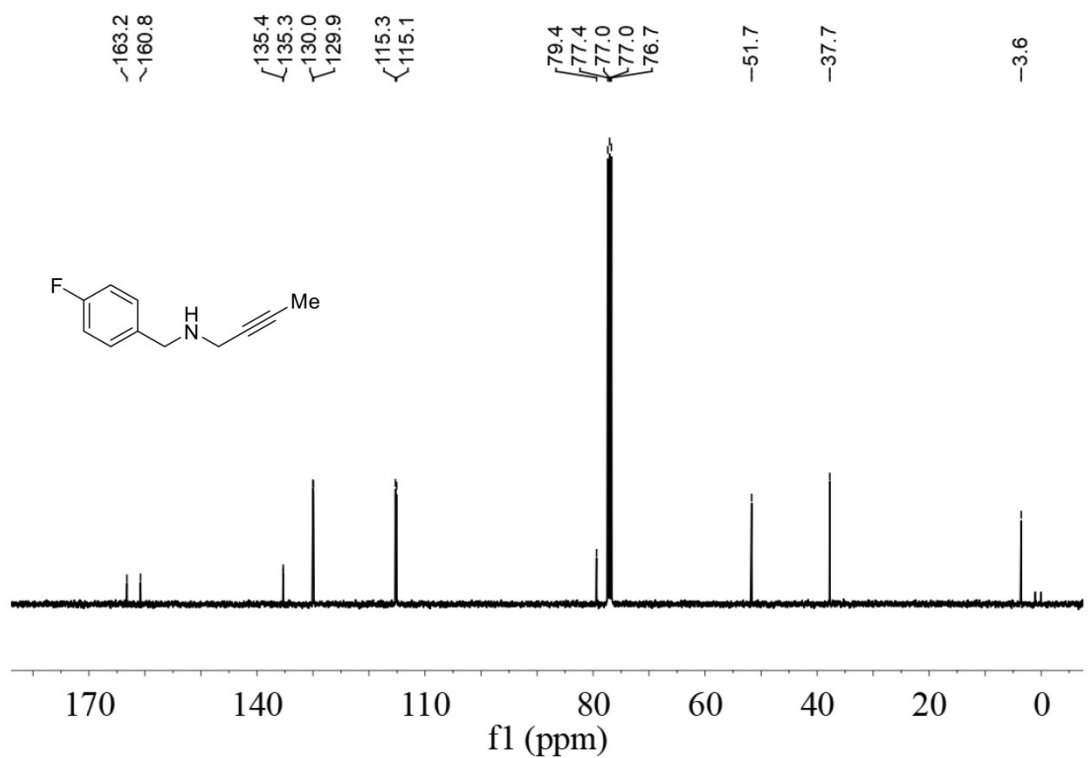

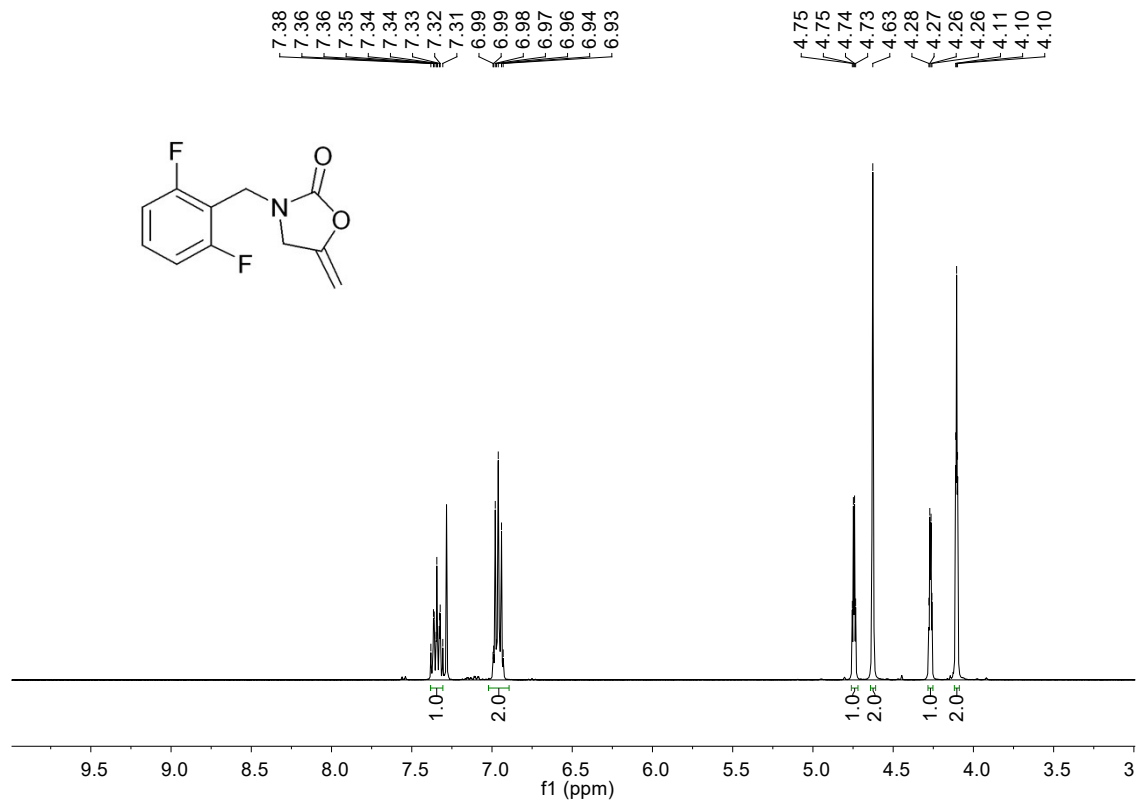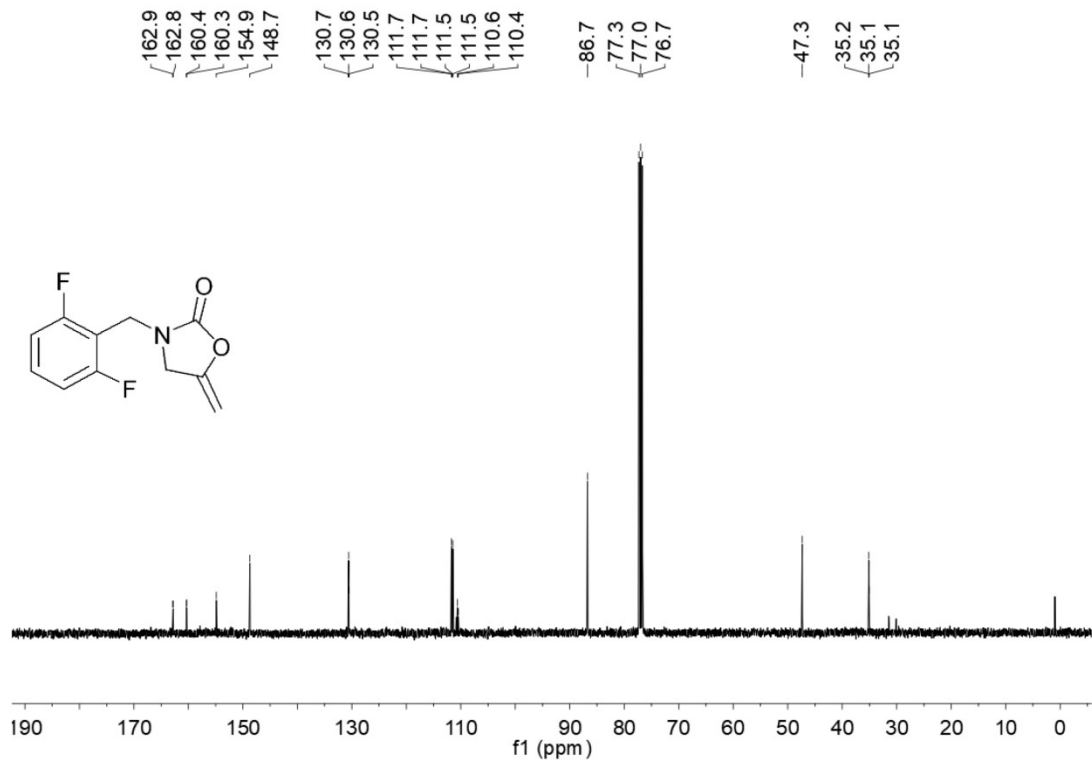

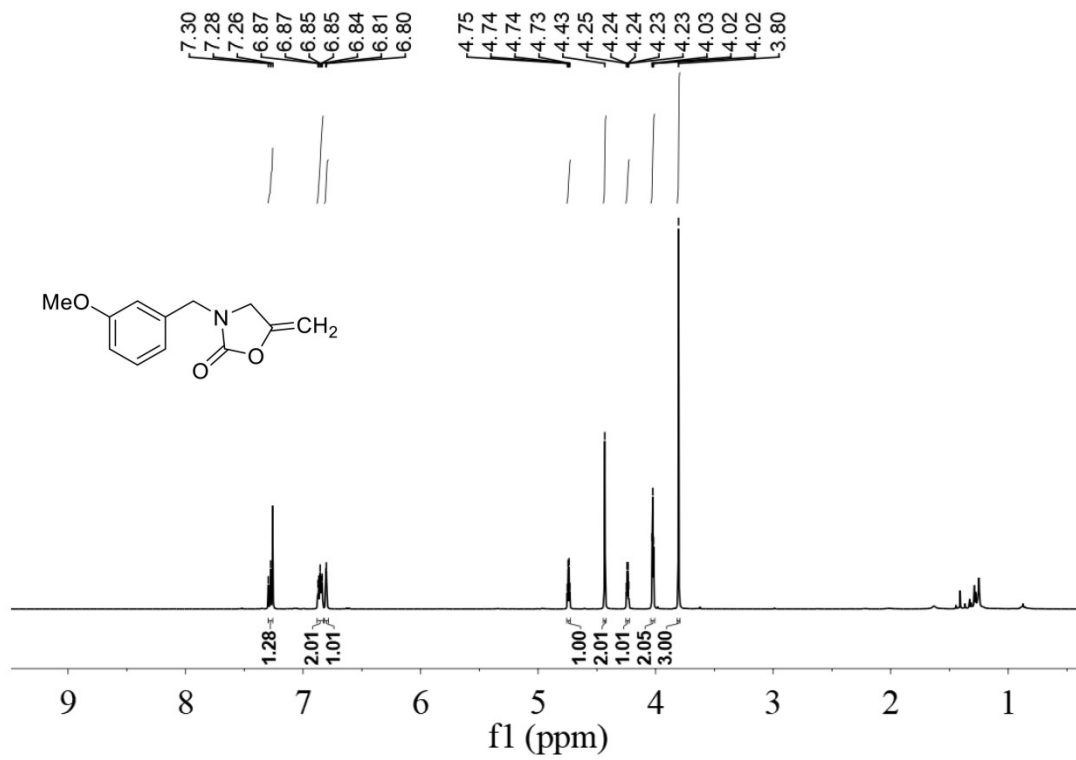

160.0, 155.6, 148.9, 136.4, 130.0, 120.3, 113.6, 113.6, 86.7, 77.3, 77.0, 76.7, 55.2, 47.7, 47.2

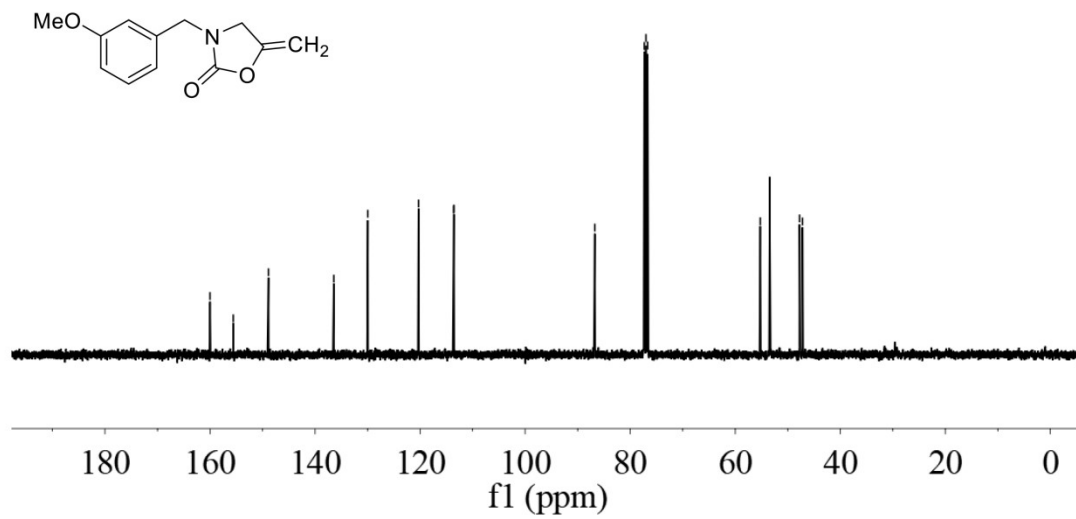

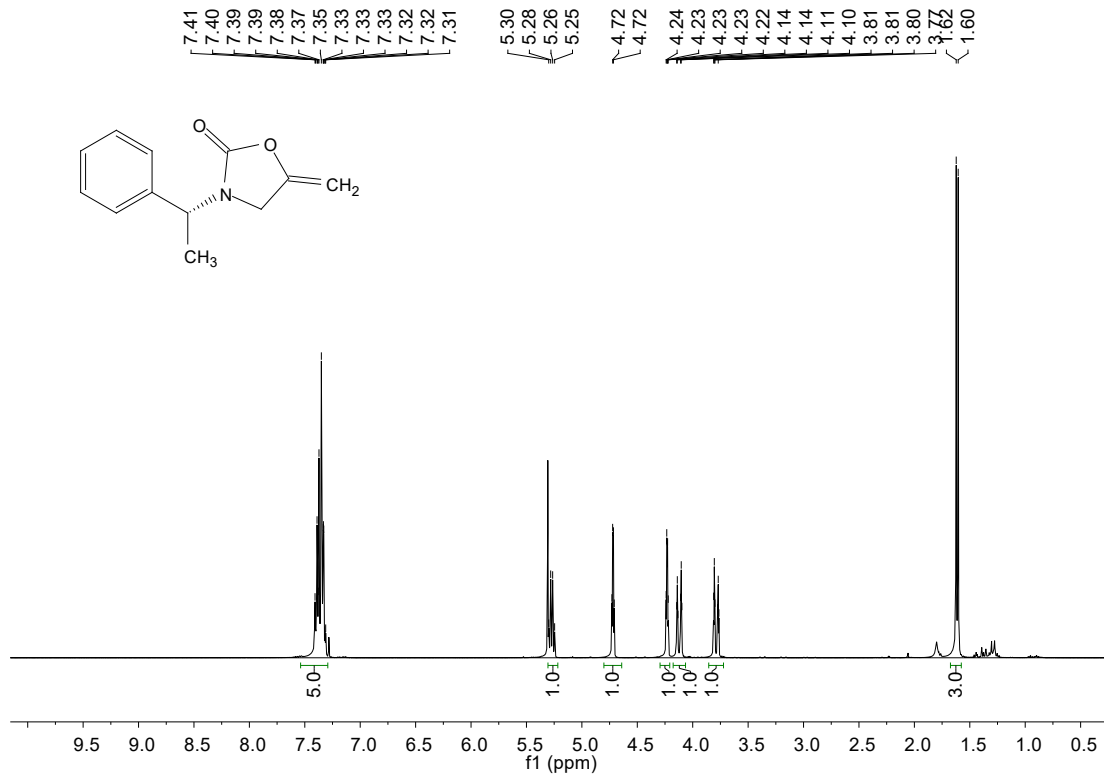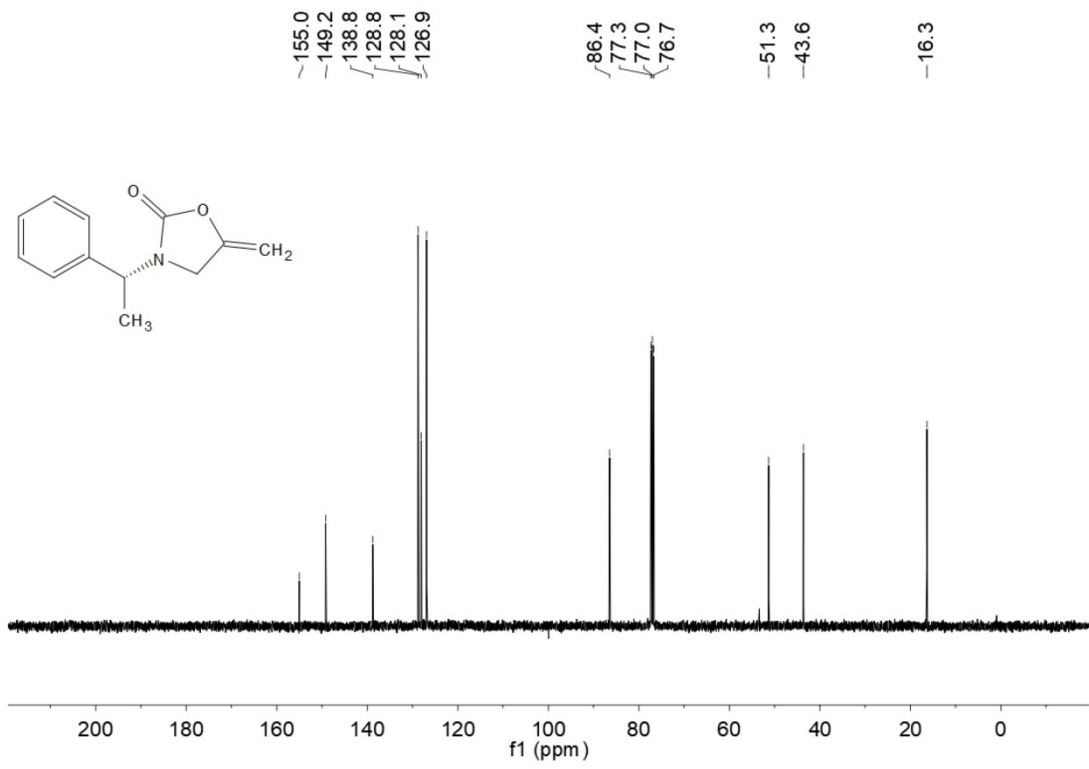

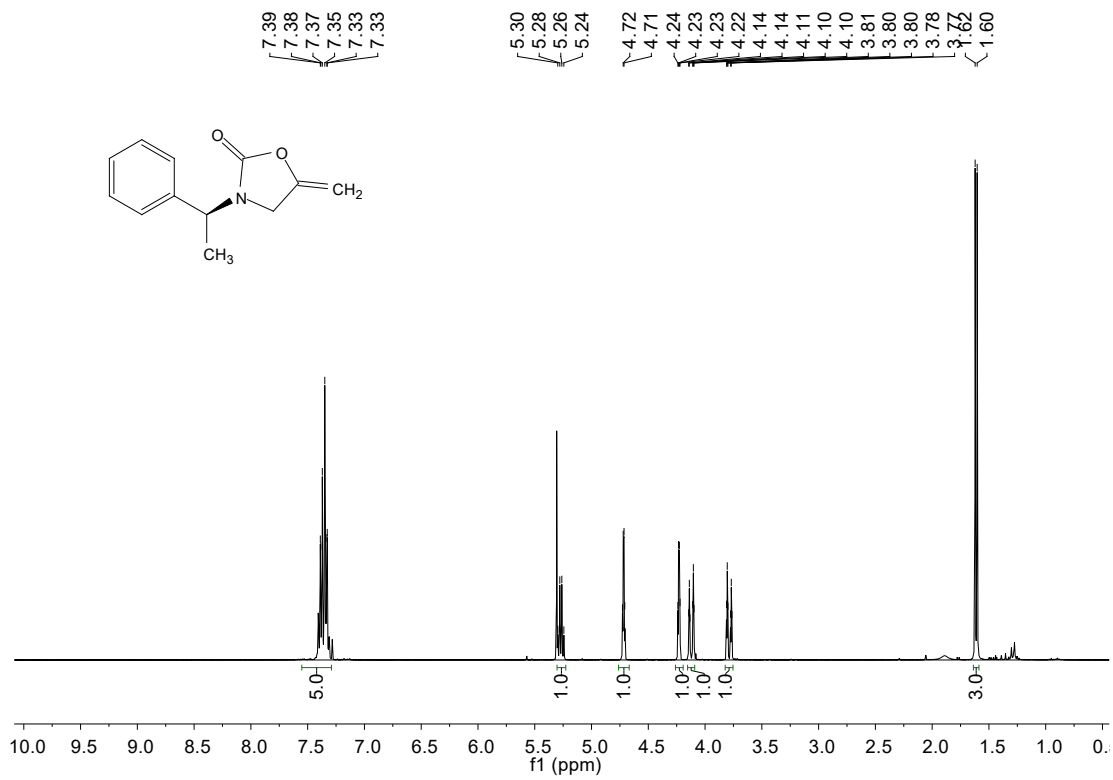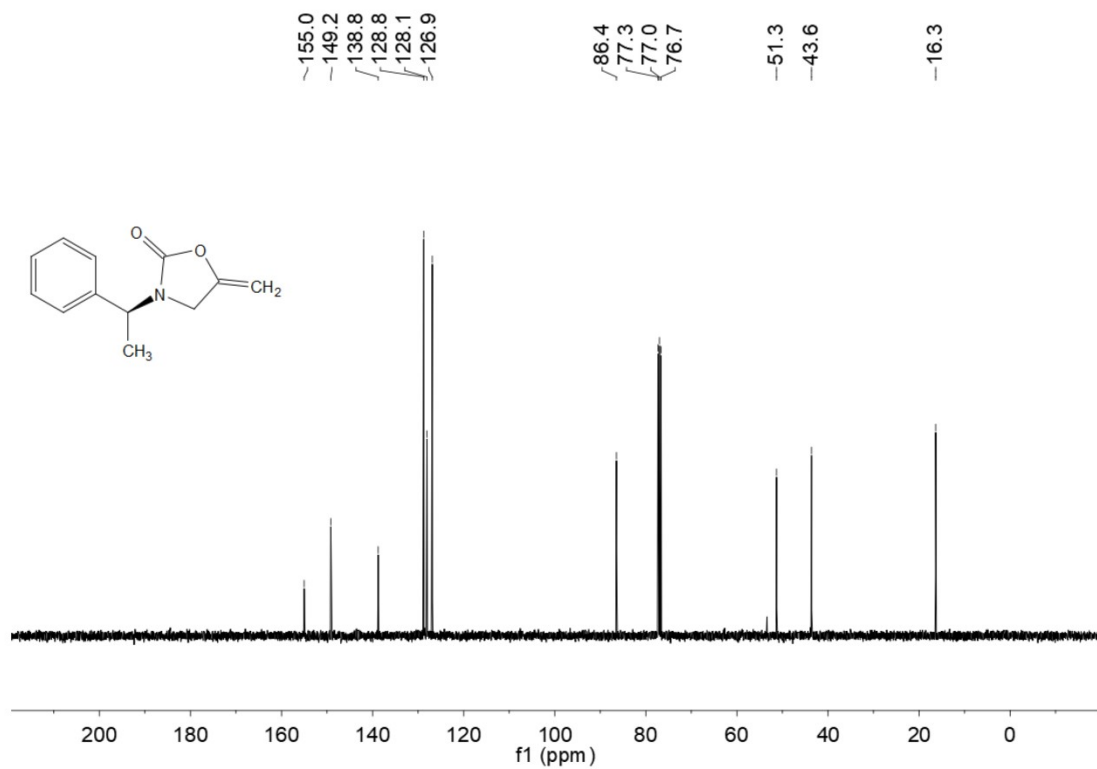

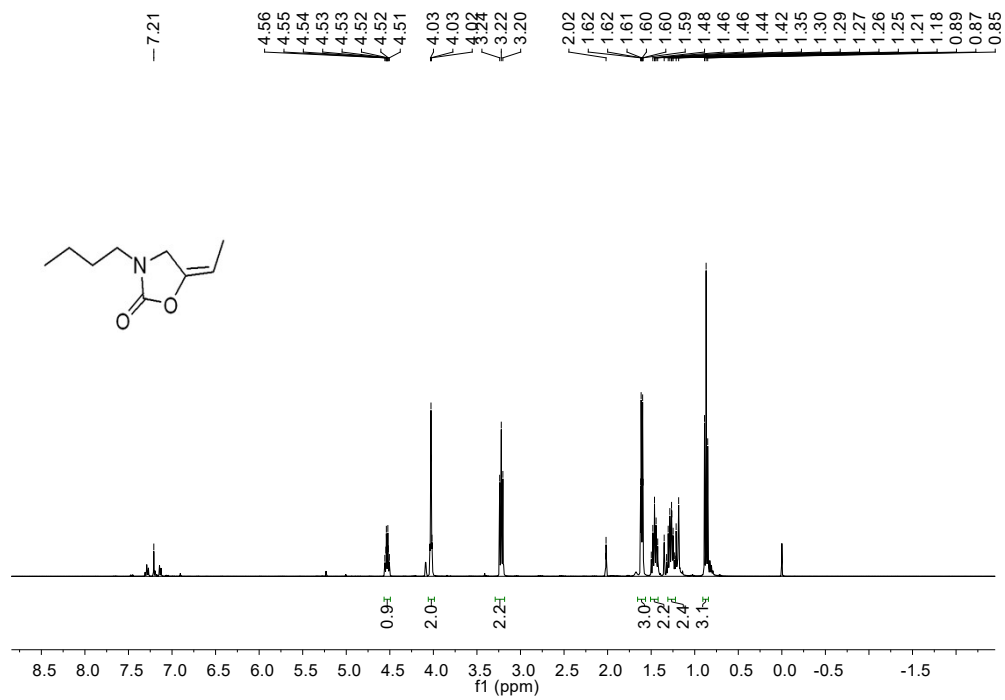



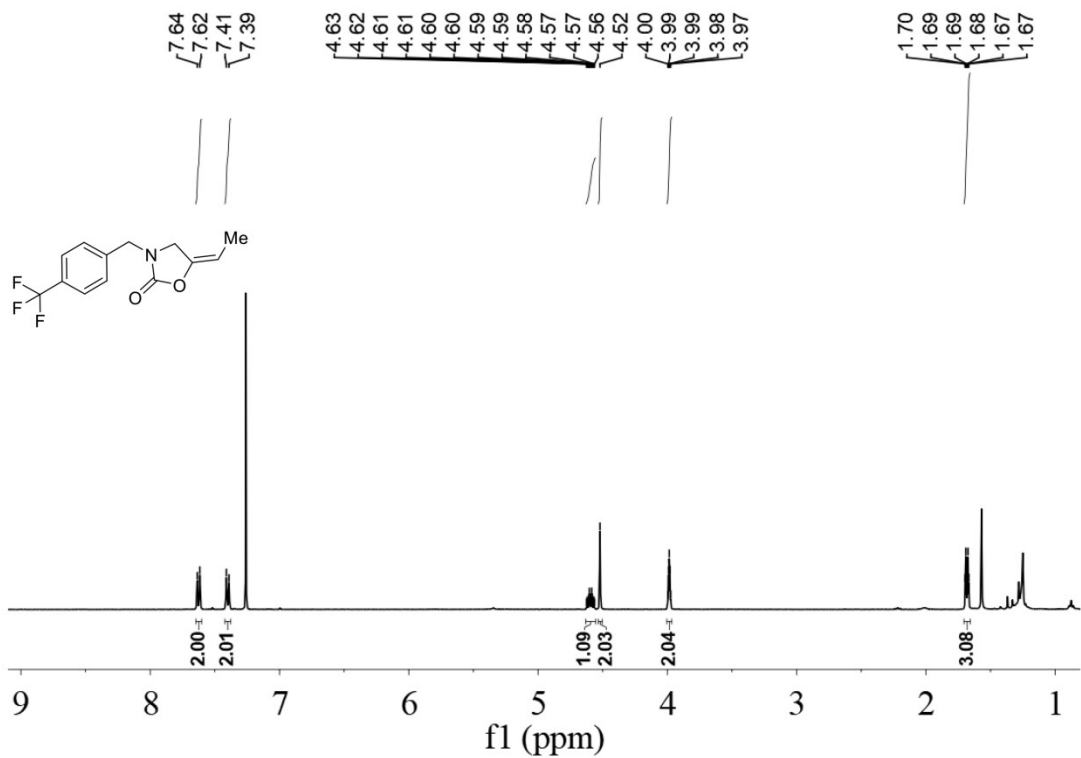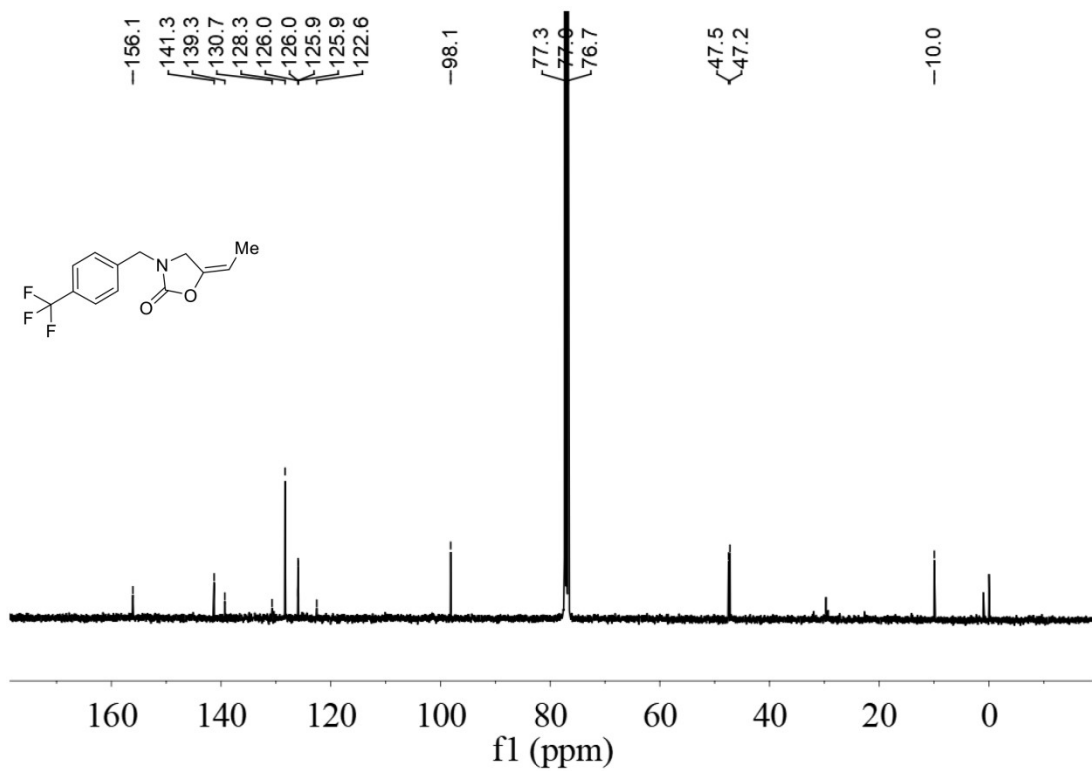

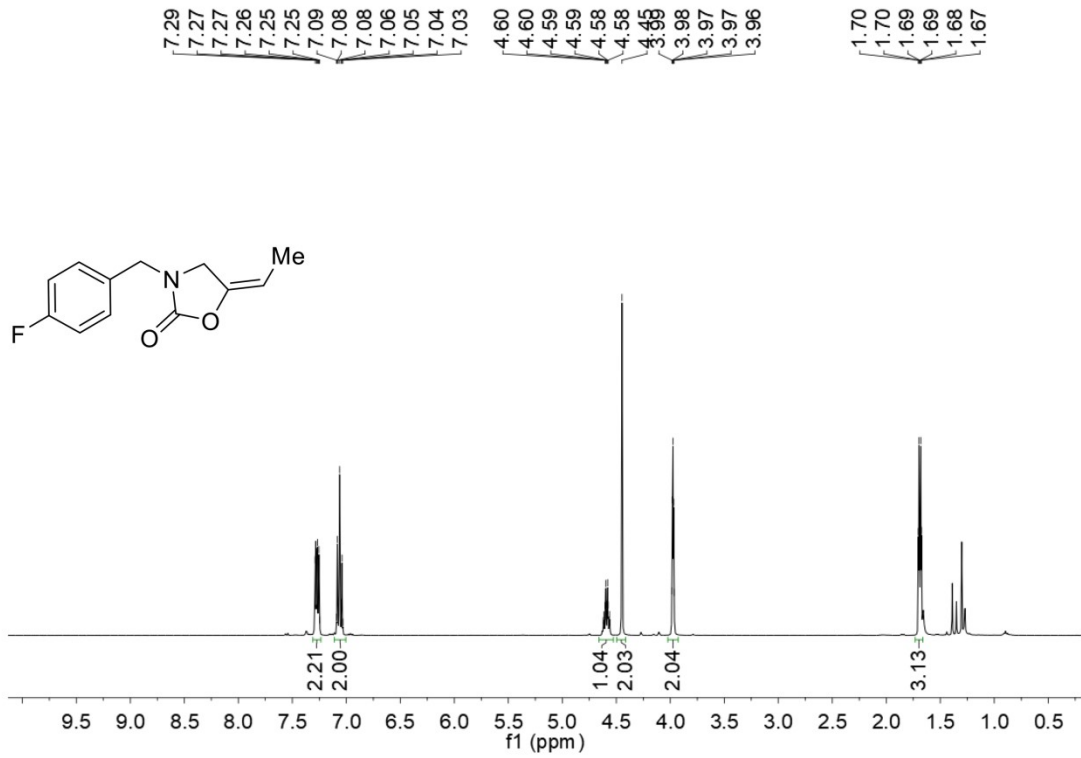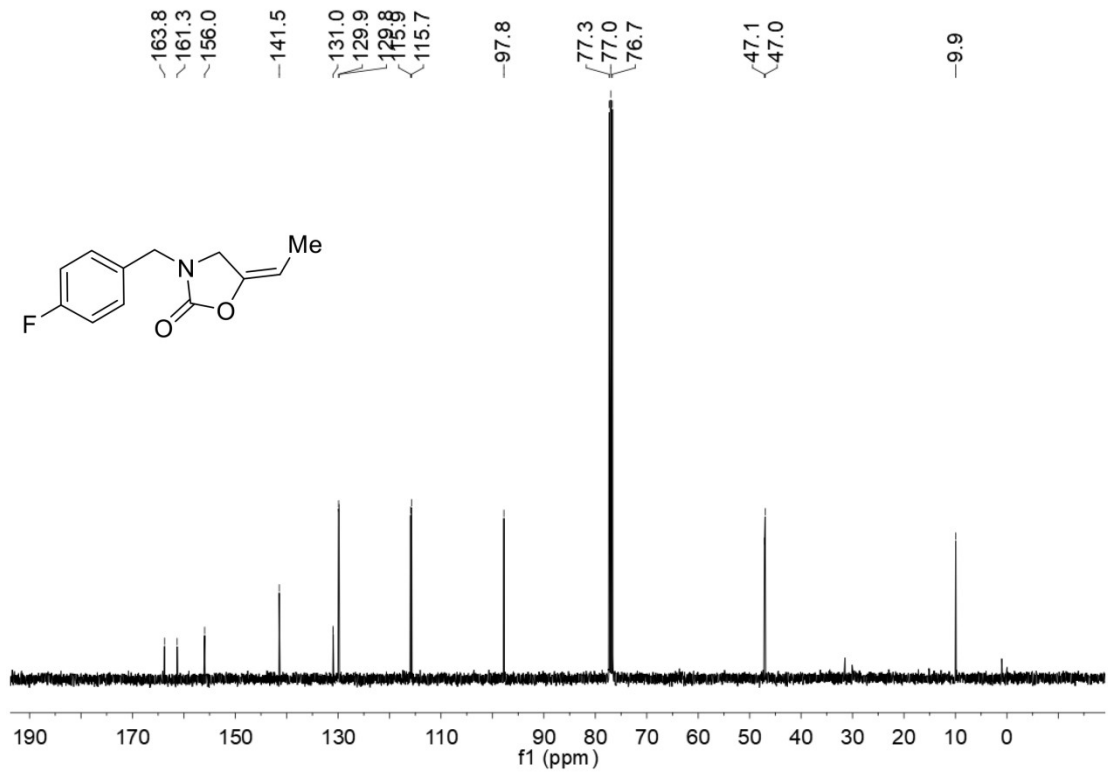

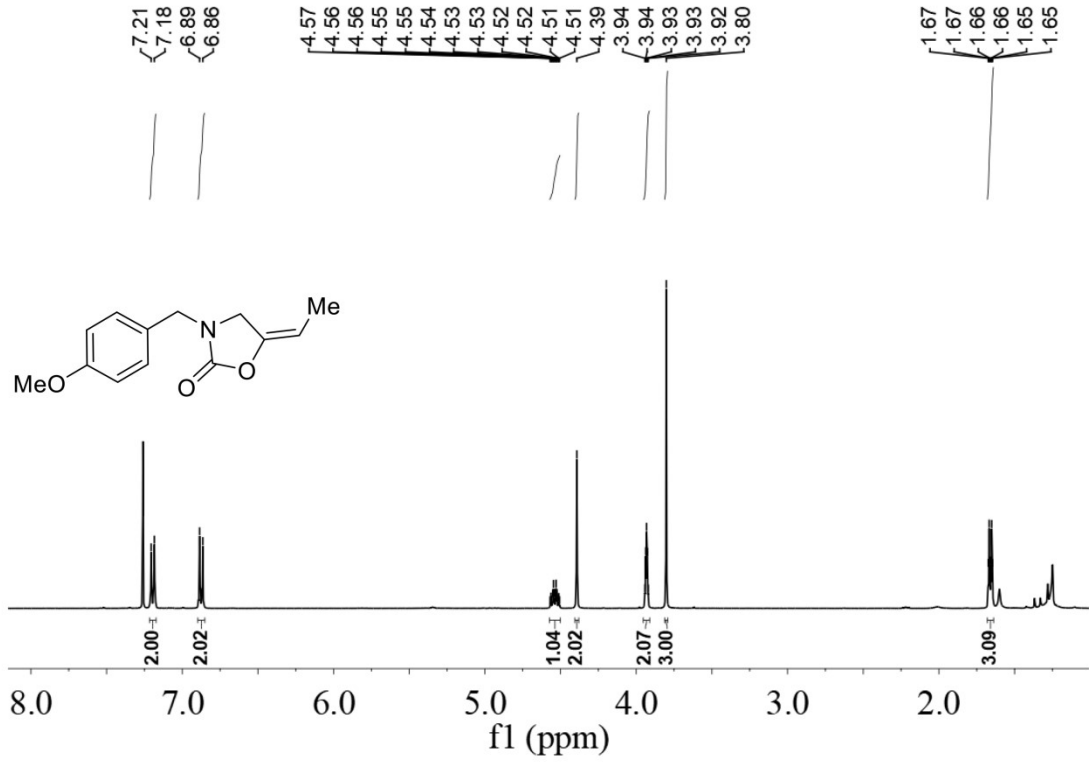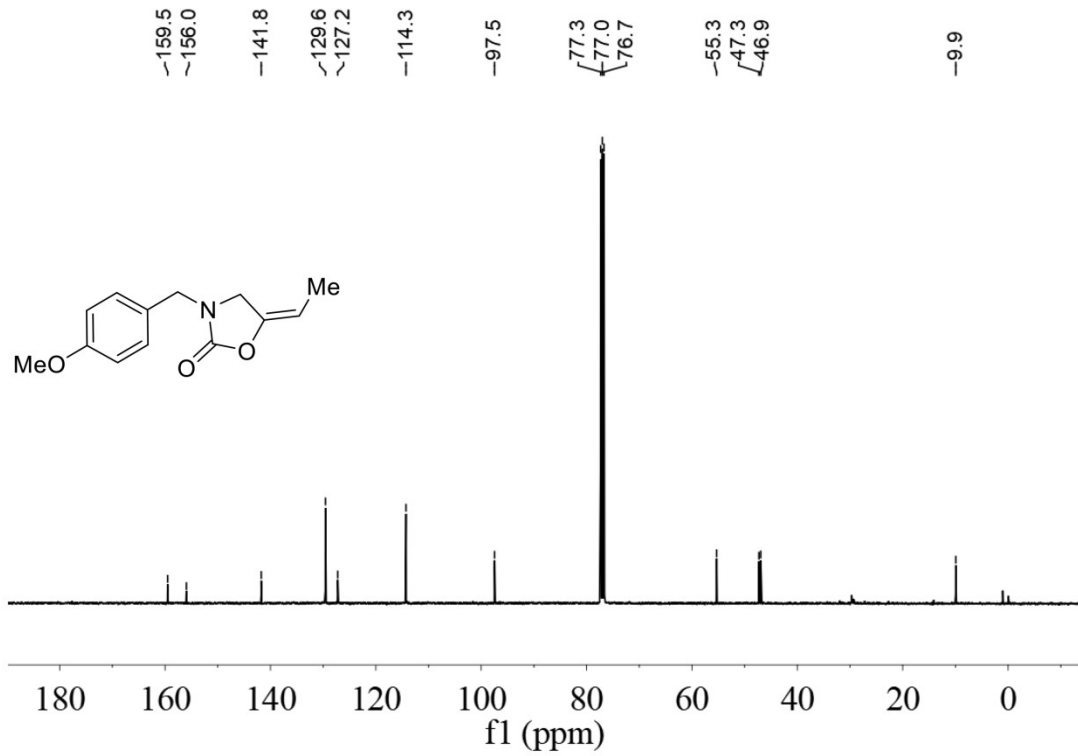

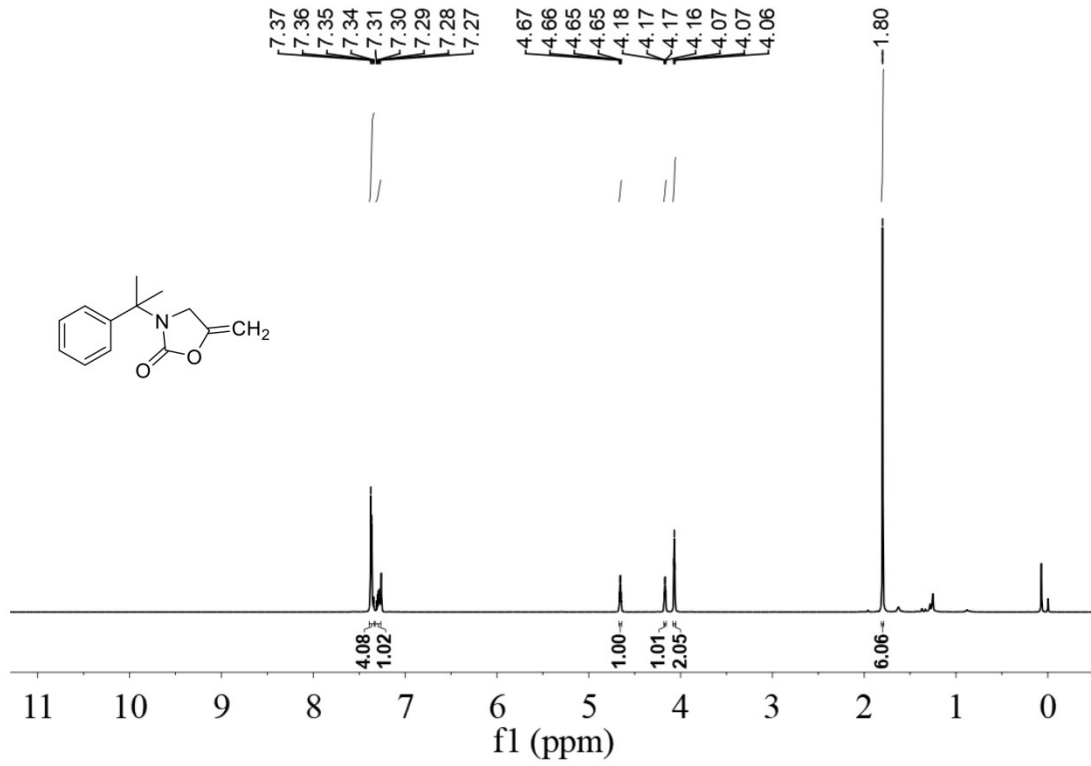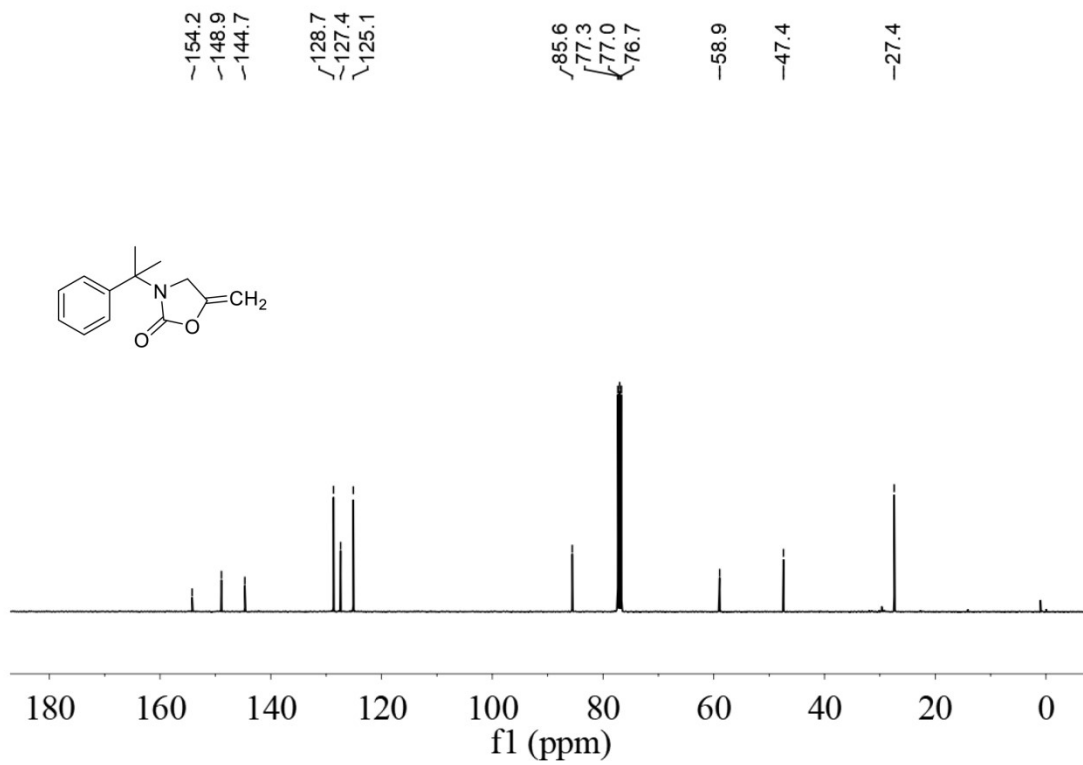

### 3. Notes and references

1. Z.-G. Zhou, J.-B. Qiu, L.-F. Xie, F. Du, G.-H. Xu, Y.-R. Xie and Q.-D. Ling, *Catal. Lett.*, 2014, **144**, 1911-1918.
2. P. García-Domínguez, L. Fehr, G. Rusconi and C. Nevado, *Chem. Sci.*, 2016, **7**, 3914-3918.
3. S. S. Islam, S. Biswas, R. Ali Molla, N. Yasmin and S. M. Islam, *ChemNanoMat*, 2020, **6**, 1386-1397.
4. C. Zhang, J. Huang, L. Qiu and X. Xu, *Org. Lett.*, 2016, **18**, 6208-6211.
5. Y. C. Martin, W. B. Martin and J. D. Taylor, *J. Med. Chem.*, 1975, **18**, 883-888.
6. F. Chen, S. Tao, Q.-Q. Deng, D. Wei, N. Liu and B. Dai, *J. Org. Chem.*, 2020, **85**, 15197-15212.
7. R. Katoono, H. Kawai, K. Fujiwara and T. Suzuki, *Tetrahedron Lett.*, 2004, **45**, 8455-8459.
8. E. Tayama and Y. Toma, *Tetrahedron*, 2015, **71**, 554-559.
9. P. D. G. Greenwood and J. Waser, *Eur. J. Org. Chem.*, 2019, **2019**, 5183-5186.
10. Y. Zhao, J. Qiu, L. Tian, Z. Li, M. Fan and J. Wang, *ACS Sustainable Chem. Eng.*, 2016, **4**, 5553-5560.
11. Y. Shunsuke, F. Kosuke, K. Satoshi and Y. Tohru, *Chem. Lett.*, 2009, **38**, 786-787.
12. M. Yoshida, T. Mizuguchi and K. Shishido, *Chem. Eur. J.*, 2012, **18**, 15578-15581.
13. Z.-H. Zhou, S.-M. Xia, S.-Y. Huang, Y.-Z. Huang, K.-H. Chen and L.-N. He, *J. CO<sub>2</sub> Util.*, 2019, **34**, 404-410.
14. X. Liu, M.-Y. Wang, S.-Y. Wang, Q. Wang and L.-N. He, *ChemSusChem*, 2017, **10**, 1210-1216.
15. M. Zhao, S. Huang, Q. Fu, W. Li, R. Guo, Q. Yao, F. Wang, P. Cui, C.-H. Tung and D. Sun, *Angew. Chem. Int. Ed.*, 2020, **59**, 20031-20036.
16. Z. Chang, X. Jing, C. He, X. Liu and C. Duan, *ACS Catal.*, 2018, **8**, 1384-1391.
17. C.-S. Cao, S.-M. Xia, Z.-J. Song, H. Xu, Y. Shi, L.-N. He, P. Cheng and B. Zhao, *Angew. Chem. Int. Ed.*, 2020, **59**, 8586-8593.
18. P. Brunel, J. Monot, C. E. Kefalidis, L. Maron, B. Martin-Vaca and D. Bourissou, *ACS Catal.*, 2017, **7**, 2652-2660.
19. S. Ghosh, R. A. Molla, U. Kayal, A. Bhaumik and S. M. Islam, *Dalton Trans.*, 2019, **48**, 4657-4666.
20. Y. Zhang, X. Lan, F. Yan, X. He, J. Wang, L. Ricardez-Sandoval, L. Chen and G. Bai, *Green Chem.*, 2022, **24**, 930-940.
21. A.-L. Gu, Y.-X. Zhang, Z.-L. Wu, H.-Y. Cui, T.-D. Hu and B. Zhao, *Angew. Chem. Int. Ed.*, 2022, **61**, e202114817.
22. X. L. Jiang, Y. E. Jiao, S. L. Hou, L. C. Geng, H. Z. Wang and B. Zhao, *Angew. Chem. Int. Ed.*, 2021, **60**, 20417-20423.

23. S. Ghosh, S. Riyajuddin, S. Sarkar, K. Ghosh and S. M. Islam, *ChemNanoMat*, 2020, **6**, 160-172.
24. S. Hase, Y. Kayaki and T. Ikariya, *ACS Catal.*, 2015, **5**, 5135-5140.
25. S. Hase, Y. Kayaki and T. Ikariya, *Organometallics*, 2012, **32**, 5285-5288.
26. F. Inagaki, K. Maeda, K. Nakazawa and C. Mukai, *Eur. J. Org. Chem.*, 2018, **2018**, 2972-2976.
27. F. Inagaki, K. Maeda, K. Nakazawa and C. Mukai, 2018, **2018**, 2972-2976.
28. X. Wang, Z. Chang, X. Jing, C. He and C. Duan, *ACS Omega*, 2019, **4**, 10828-10833.
29. K.-i. Fujita, K. Inoue, J. Sato, T. Tsuchimoto and H. Yasuda, *Tetrahedron*, 2016, **72**, 1205-1212.
30. A. Cervantes-Reyes, T. Saxl, P. M. Stein, M. Rudolph, F. Rominger, A. M. Asiri and A. S. K. Hashmi, *ChemSusChem*, 2021, **14**, 2367-2374.
31. Z. H. Zhou, K. H. Chen and L. N. He, *Chin. J. Chem.* . 2019, **37**, 1223-1228.
32. H. C. Fu, F. You, H. R. Li and L. N. He, *Front. Chem.*, 2019, **7**, 525.
33. D. Wen, Q. Zheng, S. Yang, H. Zhu and T. Tu, *J. Catal.*, 2023, **418**, 64-69.
